# Supplementary material for: Magnitude of Cardiovascular Risk Factors in Rural and Urban Areas in Benin: Findings from a Nationwide Steps Survey
Source: PubMed Central journal article supplement (PMC4422555; doi:10.1371/journal.pone.0126441), 2015-05-06
Supplement: pone.0126441.s002.pdf [file pone.0126441.s002.pdf]

REPUBLIQUE DU BENIN

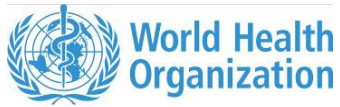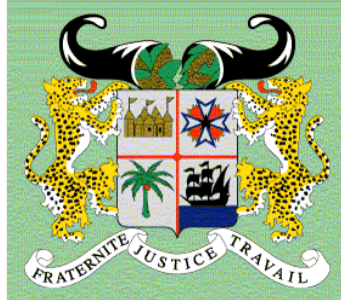

**MINISTERE  
DE LA SANTE**

Direction Nationale de la Protection Sanitaire  
Programme National de Lutte contre les Maladies Non Transmissibles

**RAPPORT FINAL DE L'ENQUETE STEPS AU  
BENIN**

Juin 2008

## **EQUIPE DE REDACTION**

|                           |                                 |
|---------------------------|---------------------------------|
| Pr. HOUINATO Dismand      | Coordonnateur National / PNLMT  |
| Dr SEGNON AGUEH Judith A. | Médecin Epidémiologiste / PNLMT |
| Pr. DJROLO François       | Point focal diabète /PNLMT      |
| Dr DJIGBENNOUDE Oscar     | Médecin Santé Publique/ PNLMT   |

## Sommaire

|                                                 |    |
|-------------------------------------------------|----|
| RESUME .....                                    | 1  |
| 1 INTRODUCTION.....                             | 2  |
| 2 OBJECTIFS .....                               | 5  |
| 3 CADRE DE L'ETUDE: (étendue géographique)..... | 7  |
| 4 METHODE .....                                 | 16 |
| 5 RESULTATS .....                               | 23 |
| 6 Références bibliographiques.....              | 83 |
| 7 Annexes                                       |    |

## Liste des tableaux

|                                                                                                                                                                                                           |    |
|-----------------------------------------------------------------------------------------------------------------------------------------------------------------------------------------------------------|----|
| <b>Tableau I:</b> Caractéristiques sociodémographiques des sujets enquêtés au Bénin en 2008.....                                                                                                          | 23 |
| <b>Tableau II:</b> Répartition des sujets enquêtés en fonction de leur niveau d’instruction, activité professionnelle et département au Bénin en 2008. ....                                               | 24 |
| <b>Tableau III :</b> Répartition des consommateurs de tabac par tranche d’âge au Bénin en 2008.                                                                                                           | 26 |
| <b>Tableau IV:</b> Répartition des consommateurs de tabac en fonction de leur fréquence de consommation et de leur sexe au Bénin en 2008.....                                                             | 27 |
| <b>Tableau V:</b> Répartition des consommateurs de tabac fumé par tranche d’âge au Bénin en 2008.....                                                                                                     | 27 |
| <b>Tableau VI :</b> Nombre moyen de cigarettes fumées par jour au Bénin en 2008. ....                                                                                                                     | 28 |
| <b>Tableau VII:</b> Répartition des consommateurs de tabac non fumé par tranche d’âge au Bénin en 2008. ....                                                                                              | 29 |
| <b>Tableau VIII:</b> Répartition des consommateurs de tabac en fonction du niveau d’instruction, de l’appartenance socioculturelle et du milieu de provenance au Bénin en 2008.....                       | 30 |
| <b>Tableau IX:</b> Répartition des consommateurs de tabac par département au Bénin en 2008. ..                                                                                                            | 31 |
| <b>Tableau X :</b> Répartition des sujets selon leur consommation d’alcool au cours des douze derniers mois en fonction de l’âge au Bénin en 2008.....                                                    | 32 |
| <b>Tableau XI:</b> Répartition des consommateurs quotidiens d’alcool par sexe au cours des douze derniers mois au Bénin.....                                                                              | 33 |
| <b>Tableau XII:</b> Répartition des consommateurs d’alcool par sexe et par fréquence de consommation au cours des douze derniers mois au Bénin. ....                                                      | 33 |
| <b>Tableau XIII :</b> Répartition des consommateurs actuels selon l’importance de la consommation au cours de la semaine écoulée en fonction de l’âge au Bénin en 2008.....                               | 35 |
| <b>Tableau XIV:</b> Répartition des consommateurs actuels par degré du risque (dangereux ou nocif) en fonction de l’âge au cours des sept derniers jours, Bénin, 2008.....                                | 36 |
| <b>Tableau XV:</b> Répartition des sujets ayant une consommation nocive d’alcool en fonction du niveau d’instruction, de l’appartenance socioculturelle et du milieu de provenance au Bénin en 2008. .... | 39 |
| <b>Tableau XVI:</b> Répartition des sujets ayant une consommation nocive d’alcool par département au Bénin en 2008. ....                                                                                  | 40 |
| <b>Tableau XVII:</b> Consommation nocive d’alcool chez les consommateurs de tabac et les non consommateurs de tabac. ....                                                                                 | 40 |
| <b>Tableau XVIII:</b> consommation de tabac chez les sujets ayant une consommation nocive d’alcool et chez les abstinents. ....                                                                           | 41 |
| <b>Tableau XIX :</b> Répartition des sujets selon le niveau d’activité et l’âge au Bénin en 2008...                                                                                                       | 42 |
| <b>Tableau XX:</b> Répartition des sujets ayant un niveau d’activité physique limite selon le département au Bénin en 2008 .....                                                                          | 43 |
| <b>Tableau XXI :</b> Répartition des sujets selon la pratique de l’activité physique au travail, le sexe et l’âge au Bénin en 2008 .....                                                                  | 44 |
| <b>Tableau XXII :</b> Répartition des sujets qui pratiquent une activité physique au travail en fonction du lieu de provenance au Bénin en 2008.....                                                      | 44 |

|                                                                                                                                                                           |    |
|---------------------------------------------------------------------------------------------------------------------------------------------------------------------------|----|
| <b>Tableau XXIII:</b> Répartition des sujets selon la pratique de l'activité physique pour les déplacements, le sexe et l'âge au Bénin en 2008.....                       | 45 |
| <b>Tableau XXIV:</b> Répartition des sujets inactifs aux déplacements selon le lieu de provenance au Bénin en 2008.....                                                   | 45 |
| <b>Tableau XXV:</b> Répartition des sujets selon la pratique ou non de l'activité physique pour les loisirs, le sexe et l'âge au Bénin en 2008.....                       | 46 |
| <b>Tableau XXVI:</b> Répartition des sujets qui pratiquent une activité physique au loisir en fonction du lieu de provenance au Bénin en 2008.....                        | 46 |
| <b>Tableau XXVII :</b> Temps moyen en minutes consacre a chaque type d'activité physique selon l'âge au Bénin en 2008.....                                                | 47 |
| <b>Tableau XXVIII :</b> Temps moyen consacré chaque jour à des comportements sédentaires selon le sexe et l'âge au Bénin en 2008.....                                     | 49 |
| <b>Tableau XXIX :</b> Répartition des sujets selon la consommation insuffisante de fruits et de légumes et l'âge au Bénin en 2008.....                                    | 50 |
| <b>Tableau XXX :</b> Répartition des sujets selon la consommation de fruits et légumes et le département au Bénin en 2008.....                                            | 51 |
| <b>Tableau XXXI:</b> Répartition des sujets selon la consommation de fruits et légumes et le lieu de provenance au Bénin en 2008.....                                     | 51 |
| <b>Tableau XXXII :</b> Répartition des sujets selon la consommation insuffisante de fruits et légumes et le niveau d'instruction au Bénin en 2008.....                    | 52 |
| <b>Tableau XXXIII :</b> Répartition des sujets selon la consommation insuffisante de fruits et légumes et l'ethnie au Bénin en 2008.....                                  | 52 |
| <b>Tableau XXXIV :</b> Répartition des sujets selon la consommation insuffisante de fruits et de légumes et la catégorie professionnelle au Bénin en 2008.....            | 53 |
| <b>Tableau XXXV:</b> Nombre moyen de portion de fruits et/ ou de légumes consommés par jour selon l'âge au Bénin en 2008.....                                             | 54 |
| <b>Tableau XXXVI :</b> Nombre moyen de jours de consommation de fruits ou de légumes par semaine selon l'âge au Bénin en 2008.....                                        | 54 |
| <b>Tableau XXXVII :</b> Prévalence de la TA élevée en fonction du sexe, du milieu de résidence et de l'âge au Bénin en 2008.....                                          | 55 |
| <b>Tableau XXXVIII :</b> Prévalence de la tension artérielle élevée en tenant compte de la prise d'antihypertenseur en fonction de l'âge au Bénin en 2008.....            | 56 |
| <b>Tableau XXXIX :</b> prévalence de la tension artérielle élevée en fonction du niveau d'instruction, de l'activité professionnelle et de l'ethnie au Bénin en 2008..... | 57 |
| <b>Tableau XL :</b> prévalence de la tension artérielle élevée en fonction des différents départements du Bénin en 2008.....                                              | 58 |
| <b>Tableau XLI :</b> Répartition des sujets enquêtés selon les différents stades de la TA élevée de l'OMS au Bénin en 2008.....                                           | 58 |
| <b>Tableau XLII:</b> Répartition des sujets ayant une TA élevée en fonction de la consommation de fruits et légumes (FL) au Bénin en 2008.....                            | 59 |
| <b>Tableau XLIII :</b> Répartition des sujets ayant une TA élevée en fonction de la consommation nocive d'alcool au Bénin en 2008.....                                    | 59 |
| <b>Tableau XLIV:</b> Répartition des sujets ayant une TA élevée en fonction de l'obésité au Bénin en 2008.....                                                            | 60 |

|                                                                                                                                                               |    |
|---------------------------------------------------------------------------------------------------------------------------------------------------------------|----|
| <b>Tableau XLV:</b> Répartition des sujets enquêtés ayant une TA élevée en fonction de leurs antécédents au Bénin en 2008 .....                               | 61 |
| <b>Tableau XLVI:</b> Prévalence de l'obésité en fonction de l'âge au Bénin en 2008.....                                                                       | 62 |
| <b>Tableau XLVII:</b> prévalence de l'obésité en fonction du niveau d'instruction, de l'activité professionnelle et de l'ethnie au Bénin en 2008.....         | 63 |
| <b>Tableau XLVIII:</b> prévalence de l'obésité en fonction des départements au Bénin en 2008..                                                                | 64 |
| <b>Tableau XLIX:</b> prévalence de la surcharge pondérale en fonction de l'âge au Bénin en 2008 .....                                                         | 65 |
| <b>Tableau L:</b> Prévalence de la surcharge pondérale en fonction de l'activité professionnelle et de l'ethnie au Bénin en 2008.....                         | 66 |
| <b>Tableau LI:</b> Prévalence de l'hyperglycémie et de la glycémie anormale a jeun en fonction de l'âge au Bénin en 2008.....                                 | 69 |
| <b>Tableau LII :</b> Prévalence de la glycémie à jeun anormale et de l'hyperglycémie de type diabétique en fonction du département au Bénin en 2008. ....     | 70 |
| <b>Tableau LIII:</b> Prévalence de la glycémie anormale à jeun et de l'hyperglycémie de type diabétique au Bénin en 2008 .....                                | 71 |
| <b>Tableau LIV:</b> Prévalence de la glycémie à jeun anormale et de l'hyperglycémie de type diabétique selon le niveau d'instruction au bénin en 2008. ....   | 72 |
| <b>Tableau LV:</b> Prévalence de la glycémie à jeun anormale et de l'hyperglycémie de type diabétique selon l'activité professionnelle au Bénin en 2008. .... | 73 |
| <b>Tableau LVI:</b> Prévalence de l'hypercholestérolémie et de cholestérolémie totale élevée en fonction de l'âge au Bénin en 2008 .....                      | 74 |
| <b>Tableau LVII:</b> Prévalence l'hypercholestérolémie par département au Bénin en 2008 .....                                                                 | 75 |
| <b>Tableau LVIII:</b> Prévalence de l'hypercholestérolémie au Bénin selon l'ethnie .....                                                                      | 76 |
| <b>Tableau LIX:</b> Prévalence de l'hypercholestérolémie selon le niveau d'instruction au Bénin en 2008.....                                                  | 76 |
| <b>Tableau LX:</b> Prévalence de l'hypercholestérolémie selon l'activité professionnelle .....                                                                | 77 |

## **Liste des figures**

|                                                                                                                                                                            |    |
|----------------------------------------------------------------------------------------------------------------------------------------------------------------------------|----|
| <b>Figure 1:</b> Prévalence de la consommation d'alcool par niveau de risque au cours des sept derniers jours. ....                                                        | 36 |
| <b>Figure 2 :</b> Répartition des sujets enquêtés selon qu'ils aient reçu des conseils relatifs au mode de vie par un médecin ou un agent de santé pour une TA élevée..... | 60 |
| <b>Figure 3:</b> Répartition des sujets enquêtés en fonction de l'indice de masse corporelle au Bénin en 2008.....                                                         | 67 |

## **RESUME**

Les pays en développement sont confrontés à l'émergence des Maladies Non Transmissibles (MNT) dont les conséquences sont très importantes en termes de morbidité et de mortalité. Le rôle prépondérant de l'accroissement de certains facteurs de risque communs à ces affections n'est plus à démontrer. Face à cette situation, l'absence de données récentes et de système de surveillance concernant les facteurs de risque communs aux MNT, le Bénin se propose de réaliser l'enquête nationale STEPS recommandée par l'OMS. L'objectif général est d'étudier les facteurs de risque communs aux MNT.

L'étude explorera le STEPS 1, le STEPS 2 et le STEPS 3. Il s'agit d'une étude transversale, descriptive et analytique couvrant une période de 2 mois. Elle s'est déroulée dans les douze départements du Bénin et a porté sur une population d'étude composée d'adultes de 25 à 64 ans. Le sondage en grappes à plusieurs degrés proposé par l'OMS a été adopté en supposant que la population d'étude est homogène. La base de sondage est constituée par les listes des 12 départements et des 546 arrondissements du Bénin. La sélection des participants dans les ménages a été faite selon la méthode Kish recommandée par l'OMS. L'outil de collecte est constitué de l'instrument STEPS proposé par l'OMS. La saisie et l'analyse des données ont été faite de façon standardisée selon les recommandations du STEPS.

Au terme de l'étude, une prévalence des facteurs de risque comportementaux et biologiques des MNT est connue.



## 1 INTRODUCTION

L'Afrique, qui continue de supporter le poids impressionnant des maladies infectieuses, se trouve confrontée, à une explosion des maladies non transmissibles (MNT) depuis quelques décennies. Le rôle prépondérant des facteurs de risque n'est plus à démontrer dans la survenue des MNT. De nos jours, l'urbanisation des pays en développement et la mondialisation du marché alimentaire contribuent aux changements de comportement et du mode de vie des populations. Ce changement du mode de vie entraîne l'émergence et l'aggravation de ces facteurs de risque. Le seul moyen pour y remédier est la lutte contre ces facteurs de risque communs aux MNT. Les conséquences de ces MNT sont très importantes en termes de morbidité et de mortalité. Selon l'Organisation Mondiale de la Santé (OMS), les MNT sont responsables de 60% de décès et de 47% de la charge mondiale de morbidité [1].

En 2001, plus de 16,5 millions de décès dus aux maladies cardiovasculaires (MCV) ont été répertoriés dans le monde et 80% de ces décès se retrouvent dans les pays en développement (PED) [2]. Il est évident que la charge de morbidité due aux MNT aura des conséquences considérables au niveau social et économique. Selon les projections de l'OMS dans son rapport 2003, les MCV constitueront la première cause de mortalité d'ici l'an 2010 [1]. Aussi, une projection de la Banque Mondiale montre t-elle qu'en Afrique, le pourcentage de décès dû aux seuls désordres cardio-circulatoires passera de 19% en 1995 à 35% en 2015 [3].

Par ailleurs selon les estimations de l'OMS, le nombre d'adultes affectés par le diabète sucré augmentera de 170% dans les pays en développement versus 41% dans les pays développés entre 1995 à 2025 [4].

Au Bénin, diverses enquêtes ont été réalisées sur les facteurs de risque des MNT. Ainsi en 2001, la prévalence des facteurs de risque [5] était de :

- 13,6 à 20,2 % pour l'HTA
- 2,9 % pour le diabète.
- 7,5 à 19 % pour la consommation de tabac
- 10 à 20 % pour l'obésité.
- environ 20% des adultes présentent une cholestérolémie totale supérieure à 2,50 g/l.

En 2007, dans le département du Littoral, elle était de :

- 27,3 % pour l'HTA ;
- 4,6 % pour le diabète ;
- 30 % pour l'obésité chez les femmes ;
- 2,6 % pour le tabagisme ;

Au vu de ces données, le Bénin n'est guère épargné de cet accroissement des MNT. Or, la prise en charge onéreuse de ces maladies grève les dépenses de santé individuelles et collectives, dégradant davantage les conditions de vie déjà précaires de la population béninoise.

En l'absence de données récentes et de système de surveillance concernant les facteurs de risque communs aux MNT, le Bénin se propose de réaliser l'enquête nationale STEPS recommandée par l'OMS suite à l'Assemblée Mondiale de la Santé de Mai 2000. En effet, au cours de cette Assemblée, la résolution WHA/53.17 sur la stratégie mondiale de prévention intégrée des maladies non transmissibles a été adoptée ; elle s'appuie essentiellement sur l'identification et la réduction du niveau d'exposition des populations aux facteurs de risque de ces maladies chroniques.

Au Bénin, il existe déjà une structure à partir de laquelle l'enquête STEPS pourrait être développée. En effet, depuis Janvier 2007, il a été créé un Programme National de Lutte contre les Maladies Non Transmissibles (PNLMNT) animé par du personnel qualifié, compétent et disponible. De plus, un groupe de professionnels de santé a été formé sur la planification du

protocole STEPS de l’OMS, ces derniers n’attendent que l’étape de la mise en œuvre pour mettre les compétences acquises au service du PNLMT. Des ressources matérielles pourront être obtenues grâce à l’appui de l’OMS (Tensiomètre, pèse-personne, ruban métrique, Accutrend, toise, etc.)

L’importance de la mise en place d’un système de surveillance des facteurs de risque des MNT n’est plus à démontrer, elle permettra de:

- constituer une base de données sur les facteurs de risque des MNT au Bénin ;
- disposer d’arguments irréfutables pour un plaidoyer en direction des décideurs pour une meilleure allocation de ressources pour la prévention et la lutte contre ces maladies ;
- déterminer les groupes à risque, cibles des campagnes d’IEC/CC (Information, Education et Communication pour un changement de comportement) ;
- suivre dans le temps l’évolution des facteurs de risque des MNT au Bénin ;
- prévenir les épidémies de ces maladies ;
- élaborer un plan stratégique de lutte contre les MNT ;
- évaluer à long terme, les interventions sanitaires mises en œuvre à l’issue des premières enquêtes sur les facteurs de risque des MNT ;
- aider les services de santé à déterminer et planifier les priorités de santé en matière de MNT.

## **2 OBJECTIFS**

### **2.1 Objectif général**

Etudier les facteurs de risque communs aux MNT.

### **2.2 Objectifs spécifiques**

- Déterminer la prévalence des facteurs de risque comportementaux.
- Déterminer la prévalence des facteurs de risque biologiques.
- Identifier les facteurs associés à la survenue des maladies non transmissibles.



# CADRE DE L'ETUDE

### **3 CADRE DE L'ETUDE: (étendue géographique)**

Notre enquête s'est déroulée sur toute l'étendue du territoire du Bénin.

#### **3.1 Description et caractéristique du département de l'Atacora**

##### **3.1.1 Présentation du département**

Situé dans la partie septentrionale à l'extrême Ouest du Bénin, le département de l'Atacora compte neuf communes que sont : Natitingou (Chef-lieu du Département), Kérou, Kouandé, Péhunco, Cobly, Boukoumbé, Matéri, Toucountouna, Tanguiéta et regroupe 384 villages. Avec une superficie totale de 20499 km<sup>2</sup>, l'Atacora est le troisième département par son étendue, après l'Alibori (26 242 km<sup>2</sup>) et le Borgou (25 856 km<sup>2</sup>).

##### **3.1.2 Les infrastructures sociocommunitaires**

La couverture sanitaire des villages en termes de présence d'infrastructures sanitaires est mal assurée. En effet, pour 384 villages que compte le département, on a dénombré : 21 dispensaires, 27 maternités, 40 complexes de santé.

L'accès à l'eau potable semble poser encore d'énormes difficultés aux populations.

Sur le plan des infrastructures scolaires, on note 369 écoles primaires, 10 collèges à 1er cycle et 2 à 2ème cycle.

#### **3.2 Description et caractéristique du département de la Donga**

##### **3.2.1 Présentation du département de la Donga**

Le département de la Donga occupe la zone sud de l'ancien département de l'Atacora. Il s'étend sur une superficie de 11 126 km<sup>2</sup>. Il compte 177 villages ou quartiers de ville répartis dans quatre communes à savoir les communes de Djougou, de Bassila, de Copargo et de Ouaké. Le département de la Donga est composé de 26 arrondissements.

### 3.2.2 Infrastructures sociocommunautaires

Que se soit sur le plan sanitaire, de l'accès à l'eau potable ou de l'éducation, le département de la Donga a encore beaucoup de défis à relever.

On y dénombre pour 177 villages: 14 maternités, 21 Centres de Santé, 15 dispensaires.

Pour ces 177 villages, on compte 246 écoles primaires, 13 collèges à 1er cycle et 2 à 2ème cycle.

## **3.3 Description et caractéristique du département de l'Atlantique**

### 3.3.1 Présentation du département

Le département de l'Atlantique est l'un des plus petits des douze (12) départements du Bénin et s'étend sur près de 100 km de la côte vers l'intérieur du pays. Il a une superficie de 3 233 km<sup>2</sup> et regroupe 500 villages et huit communes que sont Abomey-Calavi, Allada, Kpomassè, Ouidah, So-Ava, Toffo, Torri-Bossito et Zè.

### 3.3.2 Infrastructures socio- communautaires

L'accès à l'eau potable constitue encore un véritable problème. En effet, sur 500 villages que compte le département, moins d'un tiers (150) seulement dispose d'adduction d'eau et de forages publics.

Au plan sanitaire, pour cinq cents (500) villages regroupés au sein de huit communes on dénombre : 61 Centres de Santé, 15 maternités, et 12 dispensaires ;

Sur le plan de l'éducation, on dénombre 487 écoles primaires, 51 collèges à 1er cycle et 11 à 2ème cycle. Rapportées à l'effectif de la population du département, ces infrastructures laissent encore des disparités à combler. Il faut noter que le département abrite l'Université d'Abomey- Calavi.

### **3.4 Description et caractéristique du département du Littoral**

#### **3.4.1 Présentation du département**

Le département du Littoral est la ville de Cotonou érigée en département par le dernier découpage administratif. Il le plus petit des douze (12) départements du Bénin en termes de superficie.

Contrairement à tous les autres départements, celui du Littoral est constitué d'une seule commune, Cotonou, d'une superficie de 79 Km<sup>2</sup>. Il est composé de 13 arrondissements et de 140 quartiers de ville. C'est la capitale économique du Bénin.

#### **3.4.2 Infrastructures sociocommunautaires**

Le Littoral demeure le département qui bénéficie de plus d'infrastructures à cause de son statut de capitale économique du Bénin.

La couverture sanitaire est la meilleure du pays. On dénombre plusieurs centres de formation de référence.

L'accès à l'eau potable semble être assuré, mais des quartiers entiers demeurent encore sans adduction d'eau.

Sur le plan de l'éducation, même si la couverture ne semble pas être réglée par l'Etat, les nombreux centres de formation privés comblent le vide. On dénombre 235 écoles primaires publiques, 18 collèges à 1er cycle et 24 collèges à 2ème cycle.

### **3.5 Description et caractéristique du département du Mono**

#### **3.5.1 Présentation du département**

Situé au sud-ouest de la République du Bénin, le département du Mono couvre une superficie de 1605 km<sup>2</sup>. Six communes composent ce département. Il s'agit de: Athiémé, Bopa, Comè, Grand-Popo, Houéyogbé et Lokossa. On y dénombre 276 villages regroupés en 35 Arrondissements..



### 3.5.2 Infrastructures sociocommunautaires

Les infrastructures sociocommunautaires sont insuffisantes et n'arrivent pas à satisfaire le besoin de la population dont l'effectif est en pleine croissance. Sur le plan sanitaire, on dénombre pour une population de 360 037 personnes 74 formations sanitaires se décomposant comme suit : 37 maternités, 21 Centres de Santé, 31 dispensaires

La plupart des populations de ce département ont accès à l'eau potable mais des efforts importants restent à faire.

Sur le plan scolaire, l'ensemble du département du Mono dispose de 237 écoles primaires, 23 collèges à 1er cycle et 10 collèges à 2ème cycle.

## **3.6 Description et caractéristique du département du Couffo**

### 3.6.1 Présentation du département

Situé au sud-ouest de la République du Bénin, le département du Couffo couvre une superficie de 2404 km<sup>2</sup> et regroupe les six communes d'Aplahoué, de Djakotomey, de Dogbo de Klouékanmè, de Lalo, et de Toviklin, qui totalisent 367 villages.

### 3.6.2 Infrastructures sociocommunautaires

Pour une population totale de 524 586 personnes réparties dans 367 villages.

Dans le domaine sanitaire, on dénombre : 14 dispensaires, 42 Centres de Santé, 12 maternités.

Sur le plan de l'éducation on dénombre 269 écoles primaires, 18 collèges à 1er cycle et 5 à 2ème cycle.

## **3.7 Description et caractéristique du département du Zou**

### 3.7.1 Présentation du département

Le département du Zou partage avec le département des Collines la partie centrale de la République du Bénin. Il comprend les neuf (9) communes

d'Abomey, d'Agbangnizoun, de Bohicon, de Covè, de Djidja, de Ouinhi, de Zangnanado, de Za-kpota et de Zogbodomey.

S'étendant sur une superficie de 5 243 km<sup>2</sup>, le nouveau département du Zou occupe la zone Sud de l'ancien département du Zou, compte 423 villages regroupés en soixante seize (76) Arrondissements.

### 3.7.2 Infrastructures sociocommunautaires

D'énormes difficultés existent en matière d'approvisionnement en eau potable. En effet, sur un effectif de 423 villages, moins d'un tiers (126 villages) disposent d'eau et forages.

Dans le domaine de l'éducation on dénombre 333 écoles primaires, 16 collèges à 1er cycle et 8 collèges à 2ème cycle. Dans le domaine de la santé, on dénombre : 10 maternités, 56 Centres de Santé, 28 dispensaires, 01 hôpital départemental.

## **3.8 Description et caractéristique du département des collines**

### 3.8.1 Présentation du département

Le département des Collines est limité au sud par le département du Zou, au nord-ouest par la Donga et au nord-est par le Borgou. Il couvre une superficie de 13 931 km<sup>2</sup> et est constitué de six communes que sont Bantè, Dassa-Zoumè, Glazoué, Ouèssè, Savalou et Savè, toutes traversées par des collines, d'où son nom symbolique de département des Collines. On y dénombre un total de 297 villages et quartiers de ville répartis dans 60 arrondissements.

### 3.8.2 Infrastructures sociocommunautaires

Le département des Collines dispose du point de vue des infrastructures sanitaires, de 38 maternités, 4 Centres de Santé de la Commune, 33 Centres de Santé d'Arrondissement et 82 dispensaires pour les 297 villages.

L'approvisionnement en eau de boisson pose encore beaucoup de problèmes.

On dénombre sur le plan de l'éducation, 145 écoles primaires publiques, 21 collèges à 1er cycle et 5 à 2ème cycle.

### **3.9 Description et caractéristique du département de l'Alibori**

#### **3.9.1 Présentation du département**

Le département de l'Alibori couvre les communes de Malanville, Karimama, Sègbana, Gogounou, Banikoara et Kandi, soit six communes regroupant au total 229 villages Il a une superficie de 26 242 km<sup>2</sup> (23% du territoire national).

#### **3.9.2 Infrastructures sociocommunautaires**

La couverture sanitaire des villages en termes de présence d'infrastructures sanitaires est mal assurée. En effet, on dénombre : 26 dispensaires, 23 maternités, 27 centres de Santé.

L'accès à l'eau potable constitue un véritable problème dans ce département où c'est à peine que chaque arrondissement du département dispose d'adduction d'eau et forages publics.

Sur le plan de l'éducation, le département dispose de 215 écoles primaires et 15 collèges à 1er cycle c'est-à-dire de la 6ème en 3ème et 3 collèges à 2 cycles (de la 6ème en Terminale).

### **3.10 Description et caractéristique du département du Borgou**

#### **3.10.1Présentation du département**

Le département du Borgou s'étend sur huit (8) communes. Il s'agit des communes de Kalalè, N'dali, Pèrèrè, Nikki, Sinendé, Bembèrèkè, Tchaourou et de Parakou. Le Borgou couvre une superficie de 25 856 km<sup>2</sup> (23% du territoire national) dont 13 962 km<sup>2</sup> de terres cultivables (54% de la superficie totale du département). On dénombre 310 villages.

### 3.10.2 Infrastructures sociocommunautaires.

Au plan sanitaire, on dénombre pour une population de 724 171 personnes répartie dans 310 villages, 46 Centres de Santé, 45 dispensaires.

Sur le plan scolaire, dans ce département, on dénombre 401 écoles primaires publiques pour 310 villages, 28 collèges à 1er cycle et 10 à 2ème cycle. Le département abrite l'Université de Parakou.

## **3.11 Description et caractéristique du département du Plateau**

### 3.11.1 Présentation du département

Le département du Plateau est situé dans la partie méridionale du Bénin. Il comprend cinq (5) communes (Kétou, Pobè, Adja-Ouèrè, Sakété et Ifangni), deux cent dix huit (218) villages regroupés en vingt (29) Arrondissements. Ce département couvre une superficie de 3 264km<sup>2</sup>, soit environ 3% de la superficie nationale.

### 3.11.2 Infrastructures sociocommunautaires

Le département du Plateau est faiblement couvert en adduction d'eau. Au total 217 écoles existent pour couvrir les besoins en infrastructures scolaires pour les 218 villages. On note pour l'ensemble du département 15 collèges à 1 cycle et un seul à 2 cycles, ce qui est loin de satisfaire aujourd'hui ses besoins réels. Sur le plan sanitaire, on dénombre : 05 maternités, 30 Centres de Santé, 08 dispensaires.

## **3.12 Description et caractéristique du département de l'Ouémé**

### 3.12.1 Présentation du département

Le département de l'Ouémé est situé au Sud-Est du Bénin. Avec 405 villages et une superficie de 1 281 km<sup>2</sup>, le département de l'Ouémé est constitué des neuf (9) communes suivantes: d'Adjara, d'Akpro-Misséréte, d'Avrankou, d'Adjohoun, de Bonou, de Dangbo, de Sèmè- Kpodji, des Aguégues et de Porto-

novo la capitale administrative du Bénin. Le département compte 52 Arrondissements.

### 3.12.2 Infrastructures sociocommunautaires.

Les infrastructures sociocommunautaires dans le département sont encore loin de satisfaire la population de ce département dont l'effectif est en pleine croissance.

Sur le plan sanitaire, on dénombre pour une population de 730 772 personnes, 27 maternités, 08 Centres de Santé de Commune ,19 Centres de Santé, 22 dispensaires, 01 hôpital départemental.

L'accès à l'eau potable semble poser encore plus de problèmes. Aucun arrondissement du département n'a été entièrement couvert en matière d'adduction et de forages publics. Ainsi sur 405 villages, 162 seulement disposent d'adduction d'eau.

Sur le plan scolaire, en dehors du Littoral c'est le département qui dispose de plus d'infrastructures éducatives : 428 écoles primaires pour 405 villages, 44 collèges à 1er cycle et 21 à 2ème cycle.



# METHODE DE L'ETUDE

## 4 METHODE

### 4.1 Type d'étude

Il s'est agi d'une étude transversale à visée descriptive et analytique.

### 4.2 Population d'étude

La population cible s'est composée des adultes des douze départements du Bénin.

Sont inclus dans l'enquête, les sujets âgés de 25 ans au moins et de 64 ans au plus, le jour de l'enquête et résidant au Bénin depuis 6 mois au moins.

Sont exclus de l'étude :

- Les sujets n'ayant pas donné leur consentement pour participer à l'enquête et/ ou ceux à qui on a rendu 02 visites infructueuses.
- Les personnes incapables de répondre aux questions
- Les femmes enceintes.

### 4.3 Echantillonnage

#### 4.3.1 Taille échantillon

Le calcul de la taille de l'échantillon est effectué selon la formule de Schwartz [6]:  $n = kZ\alpha^2 p.q. / i^2$

$n$  = taille de l'échantillon

$p = 27,8\%$  (prévalence de l'HTA dans le département du littoral du Bénin : [5])

$q = (1 - p) = (1 - 0,278) = 0,722$

$\alpha = 5\%$  d'où  $Z\alpha = 1,96$

$k = \text{effet grappe} = 2$

$i = 1,5\%$  (précision désirée)

$$n = \frac{2 \times 1,96^2 \times 0,278 \times 0,722}{(0,015)^2} = 6853$$

**La taille obtenue est de : 6853**

#### 4.3.2 Technique d'échantillonnage

L'étude a été menée selon une technique de sondage en grappes telle que proposée par l'OMS pour l'enquête STEPS de dépistage des facteurs de risque des MNT. La base de sondage a été constituée par la liste des 546 arrondissements du Bénin [Voir Annexe 4]. Une grappe correspondait à un arrondissement.

##### ➤ Choix des arrondissements

Pour choisir les arrondissements, nous avons inscrit sur une liste les douze départements dans un ordre tiré au hasard. Nous avons ensuite fait la liste de tous les arrondissements avec leur population respective de même que leurs populations cumulées [Voir Annexe 4]. Nous avons choisi de prendre 60 grappes, soit 60 arrondissements. La taille de chaque grappe était alors de 115 individus (6853/60). Le détail correspondant au choix des grappes figure en annexe I.

##### ➤ Choix des quartiers et villages

Dans chaque arrondissement (grappe) sélectionné, nous avons fait la liste des quartiers et villages avec leurs populations respectives. La moitié des quartiers ou villages de chaque arrondissement retenu a été tirée au hasard.

##### ➤ Choix des individus

L'enquêteur s'est placé au centre du quartier ou village et a tiré au hasard une direction. Dans cette direction, il a choisi de rentrer dans une concession sur deux. Dans chaque concession, les sujets à enquêter ont été identifiés selon la méthode de Kish. Pour ce faire, l'enquêteur a numéroté au sein de chaque concession tous les ménages et en a choisi au hasard la moitié. Par ménage sélectionné, il a recensé tous les individus par ordre décroissant d'âge, en commençant par les hommes. Il s'est ensuite référé à la table KISH des ménages (Voir annexe 1) pour identifier le Tableau Kish correspondant au numéro du ménage. La synthèse Kish des huit tableaux lui a alors permis d'identifier l'individu à enquêter à partir de son numéro.



L'étude a été menée selon une technique de sondage en grappes. La base de sondage est constituée des 546 arrondissements du Bénin.

Une liste des 12 départements du Bénin a été établie après un choix aléatoire des départements.

Une liste des arrondissements de ces départements ainsi que leurs populations cumulées a aussi été établie.

Nous avons choisi de prendre 60 grappes. Une grappe correspond à un arrondissement.

Un pas de grappe a été défini. (Population cumulée des adultes sur le nombre de grappes = 139 416).

Nous avons choisi un nombre au hasard entre 1 et le pas de grappe. C'est 312. Celui – ci nous a permis de choisir la 1ère grappe sur la liste de la population cumulée. A celle-ci nous ajouterons le pas de grappe pour déterminer la 2ème grappe, et il en sera ainsi jusqu'à choisir les 60 grappes ou arrondissements.

La taille de chaque grappe est de : 115 individus (6853/60).

Nous avons choisi d'enquêter la moitié des quartiers et villages des arrondissements sélectionnés, faute de moyens matériels et financiers.

Les 115 individus à enquêter ont été choisis dans ces quartiers et villages selon la méthode de Kish recommandée par l'OMS pour l'enquête STEPS.

Ces informations (population) ont été obtenues à partir des données du troisième recensement général de la population et de l'habitat au Bénin en 2002 [7].

(Méthode Kish : voir en annexe1)

#### **4.4 Collecte des données**

##### **4.4.1 L'outil de collecte**

Il est constitué par la partie de l'instrument STEPS de l'OMS relative aux informations démographiques et à la consommation de tabac et d'alcool. Cet

outil est un guide d'entretien qui couvre trois niveaux ou *Steps* différents dans l'évaluation des facteurs de risque (voir Annexe 2).

**Le *step 1*** se rapporte aux mesures comportementales dont la consommation de tabac et d'alcool.

**Le *step 2*** se rapporte aux mesures physiques.

**Le *step 3*** aux mesures biochimiques.

#### 4.4.2 Le matériel

- Des tables de conversion permettant de convertir des volumes de boissons alcoolisées en nombre de verre standard [Annexe 3].
- Des bols gradués
- Tensiomètre électronique OMRON
- Toise métallique
- Mètre ruban
- Pèse-personne HANA

#### 4.4.3 Equipe de collecte

Elle était composée de 40 enquêteurs repartis en 2 groupes de 10 binômes. Chaque groupe a été encadré par 2 superviseurs.

Aux binômes était affecté au besoin un traducteur (un relais communautaire du quartier).

#### 4.4.4 Durée de la collecte

La collecte des données a duré 6 semaines.

#### 4.4.5 Déroulement de l'enquête

Les enquêteurs ont été formés pendant 48 heures sur la technique d'échantillonnage et l'outil de collecte. Un pré-test des outils a ensuite été fait dans un des quartiers non retenus (Xwlacodji) pendant 24 heures le jour suivant.

L'enquête s'est déroulée simultanément dans quatre départements pendant 15 jours. Elle a commencé par les départements du Sud et s'est achevée par ceux

du Nord: Ouémé –Plateau et Atlantique-Littoral (01-13 juillet 2008) ; Mono-Couffo et Zou- Collines (21juill- 03aout) puis Borgou- Alibori et Atacora-Donga (11-24août).

En fin de journée, les superviseurs de la collecte des données faisaient le point avec le chef d'équipe. Ils ont veillé à l'exhaustivité des données, au bon remplissage du questionnaire et la complétude des données manquantes.

#### 4.4.6 Technique de collecte

La technique utilisée a été celle d'une entrevue individuelle structurée avec la personne à enquêter.

#### 4.4.7 Difficultés rencontrées

- Certains villages étaient difficiles d'accès de par leur situation géographique et la disposition des maisons dans d'autres avait rendu difficile l'application de notre technique d'échantillonnage.
- La réticence de certaines personnes et l'indisponibilité d'autres nous a obligé à nous conformer à leur emploi du temps.
- La barrière linguistique lors de l'entretien nous a contraints à utiliser des traducteurs.

#### 4.4.8 Considérations éthiques et consentement éclairé

Conformément au principe du secret professionnel la confidentialité a été rigoureusement respectée lors de l'enquête. Le consentement verbal ou écrit du patient a été obtenu avant l'administration du guide.

### **4.5 Analyse des données et test statistiques**

Une double saisie des données a été faite dans le logiciel Epi data. L'analyse des données a été faite selon les recommandations du STEP en utilisant le logiciel Epi info version 3.3.2.

Des tableaux et figures ont été réalisés pour voir la distribution du phénomène dans la population de référence. Le test de Khi-2 a été utilisé pour

comparer les fréquences et le test de Student pour comparer les moyennes. La différence était statistiquement significative pour un  $p$  égale à 0,05.

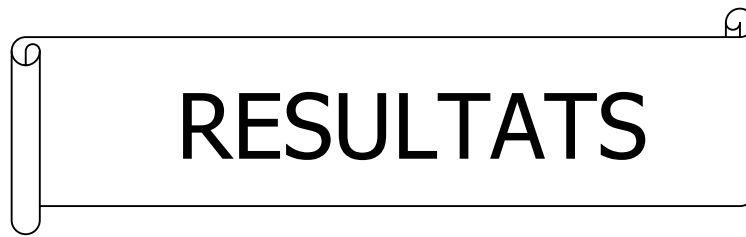

**RESULTATS**

## 5 RESULTATS

### 5.1 Description de la population d'étude

Les 6904 sujets inclus dans l'étude étaient répartis en 3485 sujets de sexe masculin et 3419 de sexe féminin, soit un sex-ratio de 1,02. La moyenne d'âge était de 42,7 ans  $\pm$  12,4 ans. Plus d'un sujet sur deux n'avait aucune instruction officielle et ils étaient majoritairement d'ethnie Fon (40,1%). Près de deux sujets sur trois appartenaient au milieu rural.

Le tableau I résume la répartition des sujets de l'étude en fonction de l'âge, du sexe, du milieu socioculturel et du milieu d'appartenance et le tableau II les informations relatives à leur niveau d'instruction, à leur activité professionnelle et à leur département.

**Tableau I:** Caractéristiques sociodémographiques des sujets enquêtés au Bénin en 2008.

| <b>Variables</b>            | <b>Fréquence (n)</b> | <b>Pourcentage (%)</b> |
|-----------------------------|----------------------|------------------------|
| <b>Age</b>                  |                      |                        |
| 25-34                       | 2167                 | 31,4                   |
| 35-44                       | 1677                 | 24,3                   |
| 45-54                       | 1179                 | 17,1                   |
| 55-64                       | <b>1881</b>          | <b>27,2</b>            |
| <b>Sexe</b>                 |                      |                        |
| Masculin                    | <b>3485</b>          | <b>50,5</b>            |
| Féminin                     | 3419                 | 49,5                   |
| <b>Milieu socioculturel</b> |                      |                        |
| Adja                        | 1050                 | 15,2                   |
| Fon                         | <b>2769</b>          | <b>40,1</b>            |
| Bariba                      | 904                  | 13,1                   |
| Dendi                       | 335                  | 4,8                    |
| Yom                         | 250                  | 3,6                    |
| Peuhl                       | 275                  | 4                      |
| Otamari                     | 243                  | 3,5                    |
| yoruba                      | 978                  | 14,3                   |
| Autres                      | 100                  | 1,4                    |
| <b>Milieu</b>               |                      |                        |
| Urbain                      | 2359                 | 34,2                   |
| Rural                       | <b>4545</b>          | <b>65,8</b>            |

**Tableau II:** Répartition des sujets enquêtés en fonction de leur niveau d'instruction, activité professionnelle et département au Bénin en 2008.

| <b>Variables</b>                | <b>Fréquence (n)</b> | <b>Pourcentage (%)</b> |
|---------------------------------|----------------------|------------------------|
| <b>Niveau d'instruction</b>     |                      |                        |
| Aucune                          | <b>4290</b>          | <b>62,1</b>            |
| Primaire                        | 1761                 | 25,5                   |
| Secondaire                      | 679                  | 9,9                    |
| Université                      | 174                  | 2,5                    |
| <b>Activité professionnelle</b> |                      |                        |
| Indépendant                     | <b>5410</b>          | <b>78,4</b>            |
| Maître (esse) de maison         | 646                  | 9,3                    |
| Employé dans le privé           | 269                  | 3,9                    |
| Employé de l'état               | 225                  | 3,3                    |
| Chômeur                         | 137                  | 2                      |
| Retraité (e)                    | 115                  | 1,6                    |
| Etudiant (e)                    | 102                  | 1,5                    |
| <b>Départements</b>             |                      |                        |
| Plateau                         | 467                  | 6,8                    |
| Atlantique                      | <b>914</b>           | <b>13,2</b>            |
| Alibori                         | 464                  | 6,7                    |
| Zou                             | 687                  | 9,9                    |
| Littoral                        | 584                  | 8,5                    |
| Mono                            | 345                  | 5                      |
| Ouémé                           | 693                  | 10,0                   |
| Couffo                          | 573                  | 8,3                    |
| Collines                        | 571                  | 8,3                    |
| Borgou                          | 687                  | 10,0                   |
| Atacora                         | 574                  | 8,3                    |
| Donga                           | 345                  | 5                      |

**STEP 1**



## 5.2 Prévalence du tabagisme

Parmi les 6904 sujets de l'étude, 1108 consommaient du tabac, soit une prévalence de 16,0% [IC95%: 15,2% – 16,9%].

Parmi les 3485 sujets de sexe masculin, 877 en consommaient, soit une prévalence de 25,2%. Dans le groupe des 3419 sujets de sexe féminin, 231 en consommaient, soit une prévalence de 6,7%. La prévalence du tabagisme était significativement plus élevée chez les hommes ( $p < 10^{-7}$ ).

Le tableau III montre la prévalence du tabagisme en fonction de l'âge. Cette prévalence augmentait significativement avec l'âge ( $p < 10^{-8}$ ).

**Tableau III :** Répartition des consommateurs de tabac par tranche d'âge au Bénin en 2008.

| Tranches d'âge<br>(ans) | Consommateurs |             | Non consommateurs |      | Total |
|-------------------------|---------------|-------------|-------------------|------|-------|
|                         | n             | %           | n                 | %    |       |
| 25-34                   | 252           | 11,6        | 1915              | 88,4 | 2167  |
| 35-44                   | 254           | 15,1        | 1423              | 84,9 | 1677  |
| 45-54                   | 201           | 17,0        | 978               | 83   | 1179  |
| 55-64                   | 401           | <b>21,3</b> | 1480              | 78,7 | 1881  |
| <b>25-64</b>            | 1108          | 16,0        | 5796              | 84   | 6904  |

### 5.2.1 Prévalence de la consommation quotidienne de tabac

Parmi les 6904 sujets, 989 consommaient quotidiennement du tabac, soit une prévalence de 14,3% [IC95%: 13,5% - 15,2%].

Parmi les 3485 sujets de sexe masculin, 785 en consommaient quotidiennement, soit une prévalence de 22,5%. Dans le groupe des 3419 sujets de sexe féminin, 204 en consommaient quotidiennement, soit une prévalence de 5,9%. La prévalence de la consommation quotidienne de tabac était significativement plus importante chez les hommes ( $p < 10^{-7}$ ).

Le tableau IV montre la répartition des consommateurs de tabac en fonction de leur fréquence de consommation.

**Tableau IV:** Répartition des consommateurs de tabac en fonction de leur fréquence de consommation et de leur sexe au Bénin en 2008.

| Sexe         | Quotidienne |             | Non quotidienne |      | Total |
|--------------|-------------|-------------|-----------------|------|-------|
|              | n           | %           | n               | %    |       |
| M            | 785         | <b>89,5</b> | 92              | 10,5 | 877   |
| F            | 204         | 88,3        | 27              | 11,7 | 231   |
| <b>Total</b> | 989         | 89,2        | 119             | 10,8 | 1108  |

M=Masculin                      F= Féminin

### 5.2.2 Prévalence de la consommation de tabac fumé

Parmi les 6904 sujets, 599 consommaient du tabac fumé, soit une prévalence de 8,7% [IC95%: 8,0% - 9,4%].

Parmi les 3485 sujets de sexe masculin, 542 fumaient, soit une prévalence de 15,5%. Dans le groupe des 3419 femmes, 57 fumaient soit une prévalence de 1,7%. La prévalence de la consommation de tabac fumé était significativement plus élevée chez les hommes ( $p < 10^{-7}$ ).

Le tableau V montre la prévalence de la consommation de tabac fumé en fonction de l'âge. Cette prévalence paraissait plus élevée chez les sujets de 45 à 54 ans, mais la différence n'était pas significative ( $p = 0,09$ ).

**Tableau V:** Répartition des consommateurs de tabac fumé par tranche d'âge au Bénin en 2008.

| Tranches d'âge<br>(ans) | Fumeurs |             | Non fumeurs |      | Total |
|-------------------------|---------|-------------|-------------|------|-------|
|                         | n       | %           | n           | %    |       |
| 25-34                   | 168     | 7,8         | 1999        | 92,2 | 2167  |
| 35-44                   | 151     | 9,0         | 1526        | 91   | 1677  |
| 45-54                   | 121     | <b>10,3</b> | 1058        | 89,7 | 1179  |
| 55-64                   | 159     | 8,4         | 1722        | 91,6 | 1881  |
| <b>25-64</b>            | 599     | 8,7         | 6305        | 91,3 | 6904  |

Parmi les 6904 sujets, 522 fumaient quotidiennement, soit une prévalence de 7,6% [IC95%: 6,9% - 8,2%].

Parmi les 3485 sujets de sexe masculin, 480 fumaient quotidiennement, soit une prévalence de 13,8%. Dans le groupe des 3419 femmes, 42 fumaient

quotidiennement, soit une prévalence de 1,2%. La prévalence de la consommation quotidienne de tabac fumé était significativement plus importante chez les hommes que chez les femmes ( $p < 10^{-7}$ ).

La plupart de ces sujets ont commencé par fumer quotidiennement à l'âge de 20 ans (20 ans chez les hommes et 18 ans chez les femmes). L'âge minimal de début était de 10ans.

Presque tous les fumeurs quotidiens utilisaient la cigarette industrielle. En effet, parmi les 522 fumeurs quotidiens, 421 utilisaient la cigarette industrielle, soit une proportion de 80,6%.

Le tableau VI montre le nombre moyen de cigarettes fumé chaque jour. Ce nombre était significativement plus élevé chez les hommes ( $p < 10^{-4}$ ).

**Tableau VI** : Nombre moyen de cigarettes fumées par jour au Bénin en 2008.

| <b>Sexe</b>  | <b>Nombre moyen</b> |
|--------------|---------------------|
| Masculin     | <b>5,4</b>          |
| Féminin      | 1,5                 |
| <b>Total</b> | <b>5,2</b>          |

### 5.2.3 Prévalence de la consommation de tabac non fumé

Parmi les 6904 sujets, 636 consommaient du tabac non fumé, soit une prévalence de 9,2% [IC95%: 8,5% -9,9%].

Parmi les 3485 sujets de sexe masculin, 442 en consommaient, soit une prévalence de 12,7%. Dans le groupe des 3419 femmes, 194 en consommaient, soit une prévalence de 5,7%. La prévalence de la consommation de tabac non fumé était significativement plus élevée chez les hommes ( $p < 10^{-7}$ ).

Le tableau VII montre la prévalence de la consommation de tabac non fumé en fonction de l'âge. Cette prévalence augmentait significativement avec l'âge ( $p < 10^{-8}$ ).

**Tableau VII:** Répartition des consommateurs de tabac non fumé par tranche d'âge au Bénin en 2008.

| Tranches d'âge<br>(ans) | Consommateurs |             | Non consommateurs |      | Total |
|-------------------------|---------------|-------------|-------------------|------|-------|
|                         | n             | %           | n                 | %    |       |
| 25-34                   | 107           | 4,9         | 2060              | 95,1 | 2167  |
| 35-44                   | 126           | 7,5         | 1551              | 92,5 | 1677  |
| 45-54                   | 113           | 9,6         | 1066              | 90,4 | 1179  |
| 55-64                   | 290           | <b>15,4</b> | 1591              | 84,6 | 1881  |
| <b>25-64</b>            | 636           | 9,2         | 6268              | 90,8 | 6904  |

Parmi les 6904 sujets, 577 consommaient quotidiennement du tabac non fumé, soit une prévalence de 8,3% [IC95%: 7,7% -9,0%].

Parmi les 3485 sujets de sexe masculin, 396 en consommaient quotidiennement, soit une prévalence de 11,4%. Dans le groupe des 3419 femmes, 181 en consommaient quotidiennement, soit une prévalence de 5,3%.

La consommation quotidienne de tabac non fumé était significativement plus élevée chez les hommes ( $p < 10^{-8}$ ).

La prévalence de la consommation du tabac diminuait significativement avec le niveau d'instruction ( $p < 10^{-8}$ ). Elle était significativement plus faible en milieu urbain qu'en milieu rural ( $p < 10^{-7}$ ). La plus grande prévalence a été enregistrée dans l'Atacora. Le groupe socioculturel le plus touché était les Otamari (42%) et le moins touché les fon (7%). Les tableaux VIII et IX montrent la prévalence de la consommation de tabac en fonction des caractéristiques sociodémographiques des sujets.

#### 5.2.4 Prévalence du tabagisme et facteurs socioculturels

**Tableau VIII:** Répartition des consommateurs de tabac en fonction du niveau d’instruction, de l’appartenance socioculturelle et du milieu de provenance au Bénin en 2008.

| Variables                   | Consommateurs de tabac |             | p      |
|-----------------------------|------------------------|-------------|--------|
|                             | n                      | %           |        |
| <b>Niveau d’instruction</b> |                        |             |        |
| Aucun                       | 813                    | <b>18,9</b> | < 10-8 |
| Primaire                    | 239                    | 13,6        |        |
| Secondaire                  | 49                     | 7,2         |        |
| Universitaire               | 7                      | 4,0         |        |
| <b>Milieu socioculturel</b> |                        |             |        |
| Adja                        | 148                    | 14,1        | < 10-8 |
| Fon                         | 193                    | 7           |        |
| Bariba                      | 277                    | 30,6        |        |
| Dendi                       | 53                     | 15,8        |        |
| Yom                         | 102                    | 40,8        |        |
| Peulh                       | 66                     | 24          |        |
| Otamari                     | 102                    | <b>42</b>   |        |
| Yoruba                      | 145                    | 14,8        |        |
| Autres                      | 22                     | 22          |        |
| <b>Milieu de provenance</b> |                        |             |        |
| Rural                       | 886                    | <b>19,5</b> | < 10-7 |
| Urbain                      | 222                    | 9,4         |        |

**Tableau IX:** Répartition des consommateurs de tabac par département au Benin en 2008.

| Départements | Tabac fumé |             | Tabac non fumé |             |
|--------------|------------|-------------|----------------|-------------|
|              | n          | %           | n              | %           |
| Plateau      | 45         | 9,6         | 32             | 6,8         |
| Atlantique   | 60         | 6,5         | 6              | 0,6         |
| Alibori      | 38         | 8,2         | 70             | 15,1        |
| Zou          | 59         | 8,6         | 24             | 3,5         |
| Littoral     | 17         | 2,9         | 6              | 1,0         |
| Mono         | 35         | 10,1        | 25             | 7,2         |
| Ouémé        | 25         | 3,6         | 6              | 0,9         |
| Couffo       | 59         | 10,3        | 55             | 9,6         |
| Collines     | 52         | 9,1         | 27             | 4,7         |
| Borgou       | 74         | 10,8        | 147            | 21,4        |
| Atacora      | 87         | <b>15,1</b> | 156            | <b>27,1</b> |
| Donga        | 48         | 13,9        | 82             | 23,8        |

### 5.3 Prévalence de la consommation d'alcool

#### 5.3.1 Consommation d'alcool au cours des douze derniers mois

Parmi les 6904 sujets de l'étude, 4097 avaient consommé au moins une fois une boisson alcoolisée au cours des douze derniers mois qui ont précédé l'étude, soit une prévalence de 59,3% [IC95%: 58,2% -60,5%].

Parmi les 3485 sujets de sexe masculin, 2394 en avaient consommé, soit une prévalence de 68,7%. Dans le groupe des 3419 sujets de sexe féminin, 1703 en avaient consommé, soit une prévalence de 49,8%. La prévalence de la consommation d'alcool était significativement plus élevée chez les hommes ( $p < 10^{-7}$ ).

Par ailleurs, Le nombre moyen de verres consommé par jour était de 3,9 verres  $\pm$  3,2 verres chez les hommes versus 2,6 verres  $\pm$  1,8 verre chez les femmes ( $p < 10^{-6}$ ). Le plus grand nombre de verre consommé par jour était de 40 chez les hommes versus 20 chez les femmes.

Le tableau X montre la prévalence de la consommation d'alcool par tranches d'âge. Cette prévalence était significativement plus élevée chez les sujets de 45 à 54 ans ( $p < 10^{-5}$ ).

**Tableau X :** Répartition des sujets selon leur consommation d'alcool au cours des douze derniers mois en fonction de l'âge au Bénin en 2008.

| Tranches d'âge<br>(ans) | Consommateurs |             | Non consommateurs |      | Total |
|-------------------------|---------------|-------------|-------------------|------|-------|
|                         | n             | %           | n                 | %    |       |
| 25-34                   | 1283          | 59,2        | 884               | 40,8 | 2167  |
| 35-44                   | 1047          | 62,4        | 630               | 37,6 | 1677  |
| 45-54                   | 744           | <b>63,1</b> | 435               | 36,9 | 1179  |
| 55-64                   | 1023          | 54,4        | 858               | 45,6 | 1881  |
| <b>25-64</b>            | 4097          | 59,3        | 2807              | 40,7 | 6904  |

Parmi les 6904 sujets, 4045 avaient eu une consommation ponctuelle excessive (28 jours en moyenne au cours des douze derniers mois), soit une prévalence de 58,6% [IC95%: 57,4% – 59,7%].

Parmi les 3485 sujets de sexe masculin 2364 avaient eu une consommation ponctuelle excessive soit 67,8%. Parmi les 3419 sujets de sexe féminin, 1681 avaient eu un tel comportement soit une prévalence de 49,2%. La prévalence de la consommation ponctuelle excessive d'alcool était significativement plus élevée chez les hommes que chez les femmes ( $p < 10^{-7}$ ).

Le tableau XI donne la prévalence de la consommation quotidienne d'alcool au cours des douze derniers mois par sexe. Cette prévalence était significativement plus élevée chez les hommes. ( $p < 10^{-7}$ ).

**Tableau XI:** Répartition des consommateurs quotidiens d'alcool par sexe au cours des douze derniers mois au Bénin.

| Sexe         | Consommateurs quotidiens |             | Non consommateurs quotidiens |      | Total |
|--------------|--------------------------|-------------|------------------------------|------|-------|
|              | n                        | %           | n                            | %    |       |
| M            | 576                      | <b>16,5</b> | 2909                         | 83,5 | 3485  |
| F            | 186                      | 5,4         | 3233                         | 94,6 | 3419  |
| <b>Total</b> | 762                      | 11,0        | 6142                         | 89   | 6904  |

Le tableau XII montre la répartition des consommateurs d'alcool en fonction de leur fréquence de consommation. Plus d'un homme sur trois consommaient de l'alcool 1 à 4 jours dans la semaine, alors que plus d'une femme sur quatre en consommaient 1 à 3 jours par mois.

**Tableau XII:** Répartition des consommateurs d'alcool par sexe et par fréquence de consommation au cours des douze derniers mois au Bénin.

| Fréquences        | Hommes |             | Femmes |             | Hommes et femmes |       |
|-------------------|--------|-------------|--------|-------------|------------------|-------|
|                   | n      | %           | n      | %           | n                | %     |
| Quotidienne       | 576    | 24,1        | 186    | 10,9        | 762              | 18,6  |
| 5-6 jours/semaine | 241    | 10,0        | 115    | 6,8         | 356              | 8,7   |
| 1-4 jours/semaine | 822    | <b>34,3</b> | 460    | 27,0        | 1282             | 31,3  |
| 1-3 jours/mois    | 502    | 21          | 499    | <b>29,3</b> | 1001             | 24,4  |
| < 1jour/mois      | 253    | 10,6        | 443    | 26,0        | 696              | 17    |
| <b>Total</b>      | 2394   | 100,0       | 1703   | 100,0       | 4097             | 100,0 |



### 5.3.2 Consommation d'alcool au cours des trente derniers jours

Au cours des 30 derniers jours qui ont précédé l'étude, 3308 sujets parmi les 6904 avaient consommé de l'alcool au moins une fois, soit une prévalence de 47,9% pour la consommation actuelle [IC95%: 46,7% – 49,1%].

Parmi les 3485 sujets de sexe masculin, 2064 en avaient consommé au cours de cette période, soit une prévalence de 59,2%. Parmi les 3419 sujets de sexe féminin, 1244 en avaient consommé au cours de la même période, soit une prévalence de 36,4%. La prévalence de la consommation actuelle d'alcool était significativement plus élevée chez les hommes ( $p < 10^{-7}$ ).

Parmi ces consommateurs actuels, 1197 avaient bu au moins 4 jours au cours de la semaine écoulée avant l'enquête, soit une proportion de 36,2% pour la consommation importante.

Parmi les 2064 consommateurs actuels de sexe masculin, 885 avaient eu une consommation importante d'alcool, soit une proportion de 42,9%. Chez les sujets de sexe féminin, cette proportion était de 25,1% (312 sujets sur 1244). La proportion des consommateurs actuels ayant eu une consommation importante au cours des sept derniers jours qui ont précédés l'enquête était significativement plus élevée chez les hommes ( $p < 10^{-7}$ ).

Le tableau XIII montre la proportion des consommateurs actuels ayant eu une consommation importante au cours de la semaine écoulée avant l'enquête en fonction de l'âge. Cette prévalence augmentait significativement avec l'âge ( $p < 10^{-6}$ ).

Le tableau XIII montre la répartition des consommateurs actuels par degré de risque en fonction de l'âge au cours des sept derniers jours qui ont précédé l'étude. La consommation nocive d'alcool augmentait significativement avec l'âge ( $p = 0,002$ ).

**Tableau XIV:** Répartition des consommateurs actuels par degré du risque (dangereux ou nocif) en fonction de l'âge au cours des sept derniers jours, Bénin, 2008.

| Tranches d'âge (ans) | Consommation dangereuse |             | Consommation nocive |            | Total |
|----------------------|-------------------------|-------------|---------------------|------------|-------|
|                      | n                       | %           | n                   | %          |       |
| 25-34                | 76                      | 7,6         | 40                  | 4          | 1003  |
| 34-44                | 91                      | 10,6        | 48                  | 5,6        | 855   |
| 45-54                | 47                      | 7,7         | 41                  | 6,7        | 607   |
| 55-64                | 98                      | <b>11,6</b> | 74                  | <b>8,8</b> | 843   |
| <b>Total</b>         | 312                     | 9,4         | 203                 | 6,1        | 3308  |

Sur les 6904 sujets de l'étude, 203 avaient eu une consommation nocive d'alcool au cours des sept derniers jours qui ont précédé l'étude, soit une prévalence de 2,9% [IC95%: 2,6% – 3,4%].

La figure 1 montre les prévalences de la consommation d'alcool au cours des sept derniers jours par niveau de risque

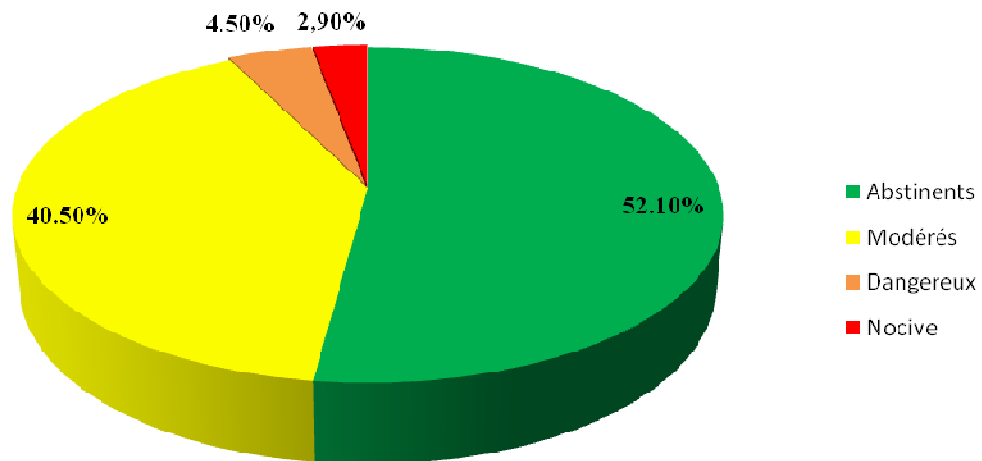

**Figure 1:** Prévalence de la consommation d'alcool par niveau de risque au cours des sept derniers jours.



La prévalence de la consommation à risque était de 9,3% chez les hommes (326 sur les 3485 de l'étude) et 5,5% chez les femmes (189 femmes sur les 3419 de l'étude). La prévalence de la consommation à risque chez les hommes était significativement plus élevée que chez les femmes ( $p < 10^{-7}$ ). La prévalence de la consommation nocive était de 4,6% chez les hommes (162 hommes sur les 3485). Chez les femmes, elle était de 1,2% (41 femmes sur les 3419). La prévalence de la consommation nocive était également significativement plus élevée chez les hommes ( $p < 10^{-7}$ ).

La prévalence de la consommation nocive était significativement plus élevée chez les sujets ayant peu ou pas d'instruction. Elle paraissait plus élevée en milieu rural qu'en milieu urbain; mais la différence n'était pas significative.

La plus forte prévalence de consommation nocive était rencontrée en milieu Otamari (6,2%) alors que la plus faible était rencontrée en milieu peulh (0,4%). Elle était de 5,2% dans le Mono (département le plus touché) et de 1,2% dans le Littoral (département le moins touché).

Les tableaux **XV** et **XV** résument ces informations.

**Tableau XVI:** Répartition des sujets ayant une consommation nocive d'alcool en fonction du niveau d'instruction, de l'appartenance socioculturelle et du milieu de provenance au Bénin en 2008.

| Variables                   | Consommation nocive (+) |            | p                 |
|-----------------------------|-------------------------|------------|-------------------|
|                             | n                       | %          |                   |
| <b>Niveau d'instruction</b> |                         |            |                   |
| Aucun                       | 131                     | 3,1        | <b>&lt; 0,001</b> |
| Primaire                    | 65                      | <b>3,7</b> |                   |
| Secondaire                  | 7                       | 1,0        |                   |
| Universitaire               | 0                       | 0          |                   |
| <b>Milieu socioculturel</b> |                         |            |                   |
| Adja                        | 41                      | 3,9        | <b>0,002</b>      |
| Fon                         | 65                      | 2,3        |                   |
| Bariba                      | 33                      | 3,6        |                   |
| Dendi                       | 7                       | 2,1        |                   |
| Yom                         | 8                       | 3,2        |                   |
| Peulh                       | 1                       | 0,4        |                   |
| Otamari                     | 15                      | <b>6,2</b> |                   |
| Yoruba                      | 32                      | 3,3        |                   |
| Autres                      | 1                       | 1          |                   |
| <b>Milieu de provenance</b> |                         |            |                   |
| Rural                       | 146                     | 3,2        | NS                |
| Urbain                      | 57                      | 2,4        |                   |

**Tableau XV:** Répartition des sujets ayant une consommation nocive d'alcool par département au Bénin en 2008.

| Départements | Consommation nocive (+) |            |
|--------------|-------------------------|------------|
|              | n                       | %          |
| Plateau      | 23                      | 4,9        |
| Atlantique   | 23                      | 2,5        |
| Alibori      | 11                      | 2,4        |
| Zou          | 16                      | 2,3        |
| Littoral     | 7                       | 1,2        |
| <b>Mono</b>  | <b>18</b>               | <b>5,2</b> |
| Ouémé        | 13                      | 1,9        |
| Couffo       | 18                      | 3,1        |
| Collines     | 17                      | 3          |
| Borgou       | 19                      | 2,8        |
| Atacora      | 28                      | 4,9        |
| Donga        | 10                      | 2,9        |

Par ailleurs, la consommation nocive d'alcool était plus fréquente chez les consommateurs de tabac que chez les non consommateurs de tabac.

En effet, parmi les 1108 consommateurs de tabac de notre étude, 105 avaient eu une consommation nocive d'alcool les sept derniers jours qui ont précédé l'enquête, soit une prévalence de 9,5%, alors que parmi les 5796 sujets non consommateurs de tabac, 100 avaient eu une consommation nocive au cours de la même période, soit une prévalence de 1,7%. Le tableau XVI montre cette différence entre les consommateurs de tabac et les non consommateurs face à l'alcool.

**TableauXVI:** Consommation nocive d'alcool chez les consommateurs de tabac et les non consommateurs de tabac.

|                            | Nocive (+) |            | Nocive (-) |      | Total |
|----------------------------|------------|------------|------------|------|-------|
|                            | n          | %          | n          | %    |       |
| Consommateurs de tabac     | 105        | <b>9,5</b> | 1003       | 90,5 | 1108  |
| Non consommateurs de tabac | 100        | 1,7        | 5696       | 98,3 | 5796  |

Réciproquement, la consommation de tabac était plus fréquente chez les sujets ayant eu une consommation nocive d'alcool au cours des sept derniers jours qui ont précédé l'enquête que chez les abstinents.

En effet, parmi les 205 sujets ayant eu une consommation nocive au cours de la semaine écoulée avant l'enquête, 105 consommaient du tabac, soit une prévalence de 51,2%, alors que sur les 2807 abstinents, 246 consommaient du tabac, soit une prévalence de 8,8%.

Le tableau XVII montre cette différence entre les abstinents et les sujets ayant une consommation nocive face au tabac.

**TableauXVII:** consommation de tabac chez les sujets ayant une consommation nocive d'alcool et chez les abstinents.

|            | <b>Fumeurs (+)</b> |             | <b>Fumeurs (-)</b> |          |
|------------|--------------------|-------------|--------------------|----------|
|            | <b>n</b>           | <b>%</b>    | <b>n</b>           | <b>%</b> |
| Nocive (+) | 105                | <b>51,2</b> | 100                | 48,8     |
| Abstinents | 246                | 8,8         | 2561               | 91,2     |



## 5.4 Prévalence de l'inactivité physique

### 5.4.1 Prévalence de l'activité physique selon le niveau d'activité

Sur les 6904 sujets, 5485 avaient un niveau élevé d'activité physique (79,45%); 794 avaient un niveau modéré d'activité physique (11,50%) et 625 avaient un niveau bas (9,05%).

Parmi les 3485 sujets de sexe masculin, 243 ont un niveau limité d'activité physique (6,97%) et 382 sujets de sexe féminin parmi les 3419 (11,17%).

Le tableau XVIII montre la prévalence de l'activité physique selon le niveau d'activité et l'âge.

**Tableau XVII** : Répartition des sujets selon le niveau d'activité et l'âge au Bénin en 2008

| Tranche d'âge | niveau d'activité limité |              | niveau d'activité moyen |       | niveau d'activité élevé |       |
|---------------|--------------------------|--------------|-------------------------|-------|-------------------------|-------|
|               | n                        | %            | n                       | %     | n                       | %     |
| 25-34         | 158                      | 7,29         | 211                     | 9,73  | 1798                    | 82,98 |
| 35-44         | 96                       | 5,72         | 176                     | 10,49 | 1405                    | 83,79 |
| 45-54         | 104                      | 8,82         | 112                     | 9,50  | 963                     | 81,68 |
| 55-64         | 267                      | <b>14,19</b> | 295                     | 15,68 | 1319                    | 70,13 |
| <b>Total</b>  | 625                      | 9,05         | 794                     | 11,50 | 5485                    | 79,45 |

La plus grande prévalence de l'inactivité physique était obtenue dans le département du Littoral (19,52%) et la plus faible prévalence dans le département de l'Atacora (2,09%).

Le tableau XIX montre la prévalence de l'inactivité physique selon le département.

**Tableau XVIII:** Répartition des sujets ayant un niveau d'activité physique limite selon le département au Bénin en 2008

| <b>Départements</b> | <b>n</b>   | <b>%</b>     | <b>Total</b> |
|---------------------|------------|--------------|--------------|
| Plateau             | 46         | 9,85         | 467          |
| Atlantique          | 92         | 10,06        | 914          |
| Alibori             | 17         | 3,66         | 464          |
| Zou                 | 46         | 6,69         | 687          |
| <b>Littoral</b>     | <b>114</b> | <b>19,52</b> | <b>584</b>   |
| Mono                | 34         | 9,85         | 345          |
| Ouémé               | 133        | 19,19        | 693          |
| Couffo              | 46         | 8,02         | 573          |
| Collines            | 40         | 7,00         | 571          |
| Borgou              | 33         | 4,80         | 687          |
| Atacora             | 12         | 2,09         | 574          |
| Donga               | 12         | 3,47         | 345          |
| <b>Total</b>        | <b>625</b> | <b>9,05</b>  | <b>6904</b>  |

#### 5.4.2 Prévalence de l'inactivité physique selon le type d'activité

##### 5.4.2.1 Prévalence de l'inactivité physique au travail

Parmi les 6904 sujets, 1223 ne pratiquaient aucune activité physique dans le cadre de leur travail, soit une prévalence de 17,71% [IC95% :16,82%-18,64%].

Cinq cent vingt sujets sur les 3480 sujets de sexe masculin ne pratiquaient pas une activité physique dans le cadre de leur travail soit une prévalence de 14,94%. Elle était de 20,53% chez les sujets de sexe féminin (703/ 3424). La prévalence de l'inactivité physique au travail était significativement plus élevée chez les femmes ( $p < 10^{-6}$ ).

Le tableau XX montre la prévalence de l'inactivité physique au travail selon le sexe et l'âge.

**Tableau XX** : Répartition des sujets selon la pratique de l'activité physique au travail, le sexe et l'âge au Bénin en 2008

| Tranche d'âge | Hommes              |             | Femmes              |             |
|---------------|---------------------|-------------|---------------------|-------------|
|               | AP-                 | AP +        | AP-                 | AP +        |
|               | n (%)               | n (%)       | n (%)               | n (%)       |
| 25-34         | 167(14,64)          | 973(85,36)  | 167(16,63)          | 837(83,37)  |
| 35-44         | 116(10,17)          | 787(69,83)  | 111(14,19)          | 671(85,81)  |
| 45-54         | 64(10,68)           | 535(89,32)  | 116(19,52)          | 478(80,48)  |
| 55-64         | 173( <b>20,64</b> ) | 665(79,36)  | 309( <b>29,59</b> ) | 735(70,41)  |
| <b>25-64</b>  | 520(14,94)          | 2960(85,06) | 703(20,53)          | 2721(79,47) |

AP + = pratique de l'activité physique      AP - = pas d'activité physique

Sur les 2359 sujets provenant du milieu urbain, 1291 ne pratiquaient pas une activité physique au travail, soit une prévalence de 54,72% versus 49,35% chez les sujets du milieu rural. Elle était significativement plus élevée en milieu urbain ( $p < 10^{-6}$ ).

Le tableau XXI montre la prévalence de l'inactivité physique au travail en fonction du lieu de provenance.

**Tableau XIX** : Répartition des sujets qui pratiquent une activité physique au travail en fonction du lieu de provenance au Bénin en 2008

| Milieu | Travail |              | Total |
|--------|---------|--------------|-------|
|        | n       | %            |       |
| urbain | 1291    | 54,72        | 2359  |
| rural  | 2243    | <b>49,35</b> | 4545  |

#### 5.4.2.2 Prévalence de l'inactivité physique pour les déplacements

Pour les déplacements, 308 sujets ne pratiquaient pas d'activité physique, soit une prévalence de 4,46% [IC95% :3,99%-4,98%].

Parmi les 3480 sujets de sexe masculin, 248 ne pratiquaient pas une activité physique dans le cadre de déplacements soit une prévalence de 7,12% versus 7,41 % (254/3424) chez les sujets de sexe féminin. Elle était significativement plus élevée chez les sujets de sexe féminin ( $p < 10^{-6}$ ). Le

tableau XXII montre prévalence de l'inactivité physique pour les déplacements selon le sexe et l'âge.

**Tableau XX:** Répartition des sujets selon la pratique de l'activité physique pour les déplacements, le sexe et l'âge au Bénin en 2008.

| Tranche d'âge | Hommes            |             | Femmes              |             |
|---------------|-------------------|-------------|---------------------|-------------|
|               | AP-               | AP +        | AP-                 | AP+         |
|               | n (%)             | n (%)       | n (%)               | n (%)       |
| 25-34         | 81(7,11)          | 1058(92,89) | 58(5,77)            | 946(94,23)  |
| 35-44         | 68( <b>7,53</b> ) | 835(92,47)  | 47(6,00)            | 736(94,00)  |
| 45-54         | 37(7,18)          | 561(93,82)  | 35(5,90)            | 558(94,10)  |
| 55-64         | 62(7,38)          | 777(92,62)  | 114( <b>10,93</b> ) | 929(89,07)  |
| <b>Total</b>  | 248(7,12)         | 3231(92,88) | 254(7,41)           | 3170(92,59) |

Sur les 2359 sujets provenant du milieu urbain, 188 ne pratiquaient pas une activité physique pour leurs déplacements soit une prévalence de 07,96% versus 04,79% chez les sujets du milieu rural. Cette prévalence était significativement plus élevée en milieu urbain qu'en milieu rural ( $p < 10^{-6}$ ).

Le tableau XXIII montre la prévalence de l'inactivité physique pour les déplacements en fonction du lieu de provenance.

**Tableau: XXIII** Répartition des sujets inactifs aux déplacements selon le lieu de provenance au Bénin en 2008

| Milieu | Travail |             | Total |
|--------|---------|-------------|-------|
|        | n       | %           |       |
| urbain | 188     | <b>7,96</b> | 2359  |
| rural  | 218     | 4,79        | 4545  |

#### 5.4.2.3 Prévalence de l'inactivité physique au loisir

Au loisir, 5612 sujets ne pratiquaient aucune activité physique, soit 81,28% [IC95% :80,34%-82,19%].

Chez les 3480 sujets de sexe masculin, 2652 ne pratiquaient pas une activité physique au loisir soit 76,20% et 2960 sujets de sexe féminin ne pratiquaient aucune activité physique soit 86,44%. La prévalence de

l'inactivité physique aux loisirs est significativement plus élevée chez les femmes que chez les hommes ( $p < 10^{-7}$ ).

Le tableau XXV montre la prévalence de l'inactivité physique aux loisirs selon le sexe et l'âge.

**Tableau XXI:** Répartition des sujets selon la pratique ou non de l'activité physique pour les loisirs, le sexe et l'âge au Bénin en 2008

| Tranche d'âge | Hommes              |              | Femmes              |              |
|---------------|---------------------|--------------|---------------------|--------------|
|               | AP-<br>n (%)        | AP+<br>n (%) | AP-<br>n (%)        | AP+<br>n (%) |
| 25-34         | 749(65,70)          | 391(34,29)   | 828(82,47)          | 176(17,52)   |
| 35-44         | 691(76,52)          | 212(23,47)   | 660(84,39)          | 122(15,60)   |
| 45-54         | 476(79,59)          | 122(20,40)   | 513(86,50)          | 80(13,49)    |
| 55-64         | 736( <b>87,72</b> ) | 103(12,27)   | 959( <b>91,77</b> ) | 86(8,22)     |
| <b>25-64</b>  | 2652(76,20)         | 828(23,79)   | 2960(86,44)         | 464(13,55)   |

Sur les 2359 sujets provenant du milieu urbain, 389 ne pratiquaient pas une activité physique dans le cadre de leur loisir, soit une prévalence de 16,49% versus 14,30% chez les sujets du milieu rural ( $p < 10^{-6}$ ). La différence de prévalence était significative.

Le tableau XXV montre la prévalence de l'inactivité physique au loisir en fonction de la provenance des sujets.

**Tableau XXV:** Répartition des sujets qui pratiquent une activité physique au travail en fonction du lieu de provenance au Bénin en 2008

| Milieu | Travail |              | Total |
|--------|---------|--------------|-------|
|        | n       | %            |       |
| urbain | 389     | 16,49        | 2359  |
| rural  | 650     | <b>14,30</b> | 4545  |

#### 5.4.3 Nombre moyen de minutes consacrées chaque jour à une activité physique

Globalement les sujets de l'étude consacraient en moyenne 208,26 minutes à une activité physique dans le cadre de leur travail. Les sujets de

sexe masculin y consacraient en moyenne 296,78 minutes versus 219,62 minutes chez les sujets de sexe féminin ( $p < 10^{-6}$ ). Cette différence était significative.

Pour leur déplacement, les sujets de l'étude consacraient en moyenne 112,61 minutes à une activité physique. Les sujets de sexe masculin y consacraient en moyenne 133,11 minutes versus 129,35 minutes chez les sujets de sexe féminin ( $p < 10^{-6}$ ). Cette différence était significative.

Dans le cadre des loisirs, les sujets de l'étude consacraient en moyenne 5,90 minutes à une activité physique. Les sujets de sexe masculin y consacraient en moyenne 13,27 minutes versus 7,35 minutes chez les sujets de sexe féminin ( $p < 10^{-6}$ ). Cette différence était significative.

Le temps moyen consacré à une activité physique au travail, pour les déplacements, au loisir diminue globalement et significativement avec l'âge ( $p < 10^{-6}$ ).

Le tableau XXVI montre le temps moyen en minutes consacré à chaque type d'activité physique selon l'âge.

**Tableau XXII :** Temps moyen en minutes consacre a chaque type d'activité physique selon l'âge au bénin en 2008

| Tranche d'âge | n           | Travail       | Déplacement   | Loisir       |
|---------------|-------------|---------------|---------------|--------------|
| 25-34         | 2096        | 282,67        | 147,78        | <b>14,93</b> |
| 35-44         | 1637        | 276,41        | 134,97        | 11,38        |
| 45-54         | <b>1143</b> | 268,63        | 125,47        | 7,52         |
| 55-64         | 1833        | <b>208,26</b> | <b>112,61</b> | 5,90         |
| <b>25-64</b>  | 6709        | 258,57        | 131,24        | 10,33        |

#### 5.4.4 Nombre moyen de minutes consacrées chaque jour à des comportements sédentaires

Les 6904 sujets de l'étude consacraient en moyenne 413 minutes par jour à des comportements sédentaires. Les femmes y consacraient en moyenne 420,71 minutes versus 405,93 minutes chez les hommes. Ce temps variait significativement selon le sexe ( $p < 10^{-4}$ ). Le temps moyen consacré

aux comportements sédentaires augmentait significativement avec l'âge jusqu'à 55 à 64 ans ( $p < 0,05$ ).

Le tableau XXVII montre le temps moyen en minutes consacré par les sujets à des comportements sédentaires selon le sexe et l'âge.

**Tableau XXIII** : Temps moyen consacré chaque jour à des comportements sédentaires selon le sexe et l'âge au Bénin en 2008

| Tranche<br>d'âge | hommes |               | femmes |               | Total |               |
|------------------|--------|---------------|--------|---------------|-------|---------------|
|                  | n      | T             | n      | T             | n     | T             |
| 25-34            | 1126   | 381,56        | 1006   | 379,94        | 2142  | 380,80        |
| 35-44            | 894    | 394,90        | 763    | 403,00        | 1657  | 398,63        |
| 45-54            | 586    | 399,09        | 576    | 421,60        | 1162  | 410,25        |
| 55-64            | 821    | <b>456,53</b> | 1037   | <b>472,79</b> | 1858  | <b>465,60</b> |
| <b>25-64</b>     | 3427   | 405,93        | 3382   | 420,71        | 6819  | 413,26        |



## 5.5 Prévalence de la consommation insuffisante de fruits et légumes

Parmi les 6904 sujets de l'étude, 5389 consommaient moins de 5 portions de fruits et légumes par jour, soit une prévalence de 78,05% [IC95% :77,05%-79,02%]. Parmi les 3485 sujets de sexe masculin, 2646 consommaient moins de 5 portions de fruits et légumes, soit une prévalence de 75,92% versus 80,22% chez les 3419 sujets de sexe féminin ( $p < 10^{-5}$ ). Cette différence était significative. Le tableau XXVIII montre la prévalence de la consommation insuffisante de fruits et de légumes en fonction de l'âge.

**Tableau XXVIII** : Répartition des sujets selon la consommation insuffisante de fruits et de légumes et l'âge au Bénin en 2008

| Tranche d'âge | < 5 portions |              | ≥5 portions |       | Total |
|---------------|--------------|--------------|-------------|-------|-------|
|               | n            | %            | n           | %     |       |
| 25-34         | 1689         | 77,95        | 478         | 22,05 | 2167  |
| 35-44         | 1266         | 75,49        | 410         | 24,51 | 1677  |
| 45-54         | 923          | 78,28        | 266         | 21,72 | 1179  |
| 55-64         | 1511         | <b>80,32</b> | 361         | 19,68 | 1881  |
| <b>Total</b>  | 5389         | 78,05        | 1515        | 21,95 | 6904  |

### Prévalence de la consommation insuffisante de fruits et de légumes selon le département

Sur le plan national, la plus grande prévalence de consommation journalière insuffisante de fruits et légumes était observée dans le département du Mono (87,24%) et la plus faible prévalence était observée dans le département du Plateau.

Le tableau XXIX montre la prévalence de la consommation insuffisante de fruits et de légumes selon le département.

**Tableau XXIV : Répartition des sujets selon la consommation de fruits et légumes et le département au Bénin en 2008**

| Départements | < 5 portions |              | ≥ 5 portions |              | Total      |
|--------------|--------------|--------------|--------------|--------------|------------|
|              | n            | %            | n            | %            |            |
| Plateau      | 319          | 68,30        | 157          | 33,41        | 467        |
| Atlantique   | 640          | 70,02        | 253          | 27,68        | 914        |
| Alibori      | 401          | 86,42        | 67           | 14,43        | 464        |
| Zou          | 497          | 72,34        | 174          | 25,32        | 687        |
| Littoral     | 476          | 81,50        | 99           | 16,95        | 584        |
| <b>Mono</b>  | <b>301</b>   | <b>87,24</b> | <b>53</b>    | <b>15,36</b> | <b>345</b> |
| Ouémé        | 577          | 83,26        | 121          | 17,46        | 693        |
| Couffo       | 457          | 79,75        | 118          | 20,59        | 573        |
| Collines     | 457          | 80,03        | 109          | 19,08        | 571        |
| Borgou       | 514          | 74,81        | 178          | 25,90        | 687        |
| Atacora      | 453          | 78,91        | 128          | 22,29        | 574        |
| Donga        | 297          | 86,08        | 58           | 16,81        | 345        |

**Prévalence de la consommation insuffisante de fruits et de légumes selon le lieu de provenance**

Sur les 2359 sujets du milieu urbain, 2008 consommaient moins de 5 portions de fruits et de légumes, soit 85,12% versus 3381(74,38%) chez les sujets du milieu rural. La prévalence était significativement plus élevée chez les sujets du milieu urbain ( $p < 10^{-7}$ ).

Le tableau XXX montre la prévalence de la consommation insuffisante de fruits et de légumes selon le lieu de provenance.

**Tableau XXX: Répartition des sujets selon la consommation de fruits et légumes et le lieu de provenance au Bénin en 2008**

| Milieu        | < 5 portions |              | ≥5 portions |       | Total |
|---------------|--------------|--------------|-------------|-------|-------|
|               | N            | %            | N           | %     |       |
| <b>urbain</b> | 2008         | <b>85,13</b> | 351         | 14,87 | 2359  |
| rural         | 3381         | 74,39        | 1164        | 25,61 | 4545  |
| <b>Total</b>  | 5389         | 78,05        | 1515        | 21,95 | 6904  |

### Prévalence de la consommation insuffisante de fruits et légumes selon le niveau d'instruction

La plus grande prévalence (87,35%) était retrouvée chez les sujets ayant un niveau d'étude universitaire. La plus faible prévalence (77,52%) était retrouvée chez les sujets n'ayant aucune instruction officielle. Cette prévalence variait significativement avec le niveau d'instruction ( $p < 0,05$ ).

Le tableau XXXI montre la prévalence de la consommation insuffisante de fruits et de légumes selon le niveau d'instruction.

**Tableau XXV** : Répartition des sujets selon la consommation insuffisante de fruits et légumes et le niveau d'instruction au Bénin en 2008

| <b>Instruction</b>   | <b>n</b> | <b>%</b>     | <b>Total</b> |
|----------------------|----------|--------------|--------------|
| Aucune               | 3326     | 77,52        | 4290         |
| Primaire             | 1380     | 78,36        | 1761         |
| Secondaire           | 531      | 78,20        | 679          |
| <b>Universitaire</b> | 152      | <b>87,35</b> | 174          |

### Prévalence de la consommation insuffisante de fruits et de légumes selon l'ethnie

La plus grande prévalence de consommation journalière insuffisante de fruits et de légumes était retrouvée chez les sujets d'ethnie Dendi.

Le tableau XXXII montre la prévalence de la consommation insuffisante de fruits et de légumes selon l'ethnie.

**Tableau XXVI** : Répartition des sujets selon la consommation insuffisante de fruits et légumes et l'ethnie au Bénin en 2008

| <b>Ethnie</b> | <b>&lt; 5 portions</b> |              | <b>≥ 5 portions</b> |          | <b>total</b> |
|---------------|------------------------|--------------|---------------------|----------|--------------|
|               | <b>n</b>               | <b>%</b>     | <b>n</b>            | <b>%</b> |              |
| Adja          | 856                    | 81,52        | 194                 | 18,48%   | 1050         |
| Fon           | 2093                   | 75,58        | 676                 | 24,42    | 2769         |
| Bariba        | 728                    | 80,53        | 176                 | 19,47    | 904          |
| <b>Dendi</b>  | 317                    | <b>94,62</b> | 18                  | 05,38    | 335          |
| Yom           | 203                    | 81,2         | 47                  | 18,80    | 250          |
| Peuhl         | 212                    | 77,09        | 63                  | 22,91    | 275          |
| Otamari       | 174                    | 71,60        | 69                  | 28,40    | 243          |

|        |     |       |     |       |     |
|--------|-----|-------|-----|-------|-----|
| Yoruba | 743 | 75,97 | 235 | 24,03 | 978 |
| Autres | 63  | 63,0  | 37  | 37,00 | 100 |

### **Prévalence de la consommation insuffisante de fruits et de légumes selon la catégorie professionnelle**

La plus grande prévalence de consommation journalière insuffisante de fruits et légumes était retrouvée chez les sujets retraités (96,52%).

Le tableau XXXIII montre la prévalence de la consommation insuffisante de fruits et de légumes selon la catégorie professionnelle.

**Tableau XXXIII** : Répartition des sujets selon la consommation insuffisante de fruits et de légumes et la catégorie professionnelle au Bénin en 2008

| Profession  | < 5 portions |              | ≥ 5 portions |       | Total |
|-------------|--------------|--------------|--------------|-------|-------|
|             | n            | %            | n            | %     |       |
| E. Etat     | 200          | 88,88        | 25           | 11,12 | 225   |
| E. Privé    | 230          | 85,50        | 39           | 14,5  | 269   |
| Indépendant | 4159         | 76,87        | 1251         | 23,12 | 5410  |
| Etudiant    | 92           | 90,19        | 10           | 09,80 | 102   |
| Maître. M   | 540          | 83,59        | 106          | 16,40 | 646   |
| Retraité    | 111          | <b>96,52</b> | 4            | 03,47 | 115   |
| Chômeur     | 57           | 41,60        | 80           | 41,60 | 137   |

#### 5.5.1 Nombre moyen de portions de fruits ou de légumes consommées par jour

Chez les 6575 sujets qui consommaient des fruits, la moyenne de portions consommées par jour était de 2,10 portions. Chez les 6749 sujets qui consommaient des légumes, la moyenne de portions consommées par jour était de 1,58 portion. Chez les 6787 sujets qui consommaient les fruits et/ou les légumes, la moyenne de portions consommées par jour était de 3,10.

Le tableau XXXIV montre le nombre moyen de portions de fruits et/ou de légumes consommés par jour selon l'âge.

**Tableau XXVII:** Nombre moyen de portion de fruits et/ ou de légumes consommés par jour selon l'âge au Bénin en 2008

| Tranche d'âge | Fruits |             | Légumes |             | Fruits et légumes |             |
|---------------|--------|-------------|---------|-------------|-------------------|-------------|
|               | n      | M           | n       | M           | n                 | M           |
| 25-34         | 2088   | 2,20        | 2125    | <b>1,52</b> | 2137              | 3,67        |
| 35-44         | 1605   | 2,24        | 1644    | 1,68        | 1647              | 3,86        |
| 45-54         | 1121   | 2,11        | 1148    | 1,55        | 1160              | 3,58        |
| 55-64         | 1761   | <b>1,85</b> | 1832    | 1,56        | 1843              | <b>3,32</b> |
| <b>25-64</b>  | 6575   | 2,10        | 6749    | 1,58        | 6787              | 3,60        |

M = nombre moyen de portion

n = effectif

### 5.5.2 Nombre moyen de jours de consommation de fruits ou de légumes

Chez les 6575 sujets qui consommaient des fruits, la moyenne de jours de consommation hebdomadaire était de 2,90 jours. Chez les 6749 sujets qui consommaient des légumes, la moyenne de jours de consommation hebdomadaire était de 4,24 jours.

Le tableau XXXV montre le nombre moyen de jours de consommation hebdomadaire de fruits ou de légumes.

**TableauXXXV :** Nombre moyen de jours de consommation de fruits ou de légumes par semaine selon l'âge au Bénin en 2008

| Tranche d'âge | Fruits |             |        | Légumes |             |        |
|---------------|--------|-------------|--------|---------|-------------|--------|
|               | n      | N           | ect    | n       | N           | ect    |
| 25-34         | 2088   | 2,98        | 2,1058 | 2125    | <b>4,15</b> | 2,0823 |
| 35-44         | 1605   | 2,95        | 2,0684 | 1644    | 4,25        | 2,0428 |
| 45-54         | 1121   | 2,81        | 2,0786 | 1148    | 4,32        | 1,9982 |
| 55-64         | 1761   | <b>2,78</b> | 2,0148 | 1832    | 4,27        | 1,9679 |
| <b>Total</b>  | 6575   | 2,89        | 2,0693 | 6749    | 4,24        | 2,0284 |

N = nombre moyen de jours

ect. = écart-type

**STEP II**

## 5.6 Prévalence de la tension artérielle élevée au Bénin en 2008

Parmi les 6904 sujets enquêtés, 1899 avaient présenté une TA  $\geq$  140/90mmHg, soit une prévalence de 27,50 % [IC 95% :26,46% - 28 ,58%].

Le tableau XXXVI montre la prévalence de la TA élevée en fonction du sexe, du milieu de résidence et de l'âge.

Neuf cent quarante neuf (949) sujets avaient une tension artérielle élevée parmi les 3485 sujets de sexe masculin, soit une prévalence de 27,23 %. Dans le groupe des 3419 sujets de sexe féminin, 899 avaient une TA élevée, soit une prévalence de 26,29 %. La prévalence de la TA élevée paraît plus élevée chez les hommes, mais cette différence n'est pas statistiquement significative ( $p=0,3$ ).

Six cents quatre vingt dix sept (697) sujets avaient une TA élevée en milieu urbain (29,54%) versus 1202 en milieu rural (26,44%). La prévalence de la tension artérielle élevée était significativement plus élevée chez les sujets vivant en zone urbaine ( $p < 10^{-2}$ ).

La prévalence de la tension artérielle élevée augmentait significativement avec l'âge ( $p < 10^{-8}$ ).

**Tableau XXVIII :** Prévalence de la TA élevée en fonction du sexe, du milieu de résidence et de l'âge au Bénin en 2008

| Variables                  | TA élevée |              | TA normale | Total |
|----------------------------|-----------|--------------|------------|-------|
|                            | n         | %            | n          |       |
| <b>Sexe</b>                |           |              |            |       |
| Masculin                   | 949       | <b>27,23</b> | 2536       | 3485  |
| Féminin                    | 899       | 26,29        | 2520       | 3419  |
| <b>Milieu de résidence</b> |           |              |            |       |
| Rural                      | 1202      | 26,44        | 3343       | 4545  |
| Urbain                     | 697       | <b>29,54</b> | 1662       | 2359  |
| <b>Age</b>                 |           |              |            |       |
| 25-34                      | 285       | 13,2         | 1867       | 2167  |
| 35-44                      | 404       | 24,1         | 1258       | 1677  |
| 45-54                      | 406       | <b>34,4</b>  | 759        | 1179  |
| 55-64                      | 804       | 2,7          | 1063       | 1881  |
| <b>Total</b>               | 1899      | 27,51        | 5005       | 6904  |

Sur l'effectif des 6904 personnes enquêtées, 1899 sujets avaient une TA élevée et 62 prenaient des médicaments antihypertenseurs, soit une prévalence de 28,4% (1961 /6904). Cette prévalence était de 28,6 % chez les 3485 sujets de sexe masculin et de 28,3 p. cent chez les 3419 de sexe féminin. (p=0, 9).

Le tableau XXXVII montre la prévalence de la tension artérielle élevée en tenant compte du traitement antihypertenseur en fonction de l'âge. Cette prévalence augmentait significativement avec l'âge (p<10<sup>-8</sup>).

**Tableau XXIX** : Prévalence de la tension artérielle élevée en tenant compte de la prise d'antihypertenseur en fonction de l'âge au Bénin en 2008

| Age          | TA élevée et traitement antiHTA |             | TA normale sans traitement antiHTA | Total |
|--------------|---------------------------------|-------------|------------------------------------|-------|
|              | n                               | %           | n                                  |       |
| 25-34        | 291                             | 13,4        | 1876                               | 2167  |
| 35-44        | 461                             | 27,5        | 1216                               | 1677  |
| 45-54        | 418                             | 35,5        | 761                                | 1179  |
| 55-64        | 791                             | <b>42,1</b> | 1090                               | 1881  |
| <b>Total</b> | 1961                            | 28,4        | 4943                               | 6904  |

Le tableau XXXVIII résume l'ensemble des informations relatives à la prévalence de la tension artérielle élevée en fonction du niveau d'instruction, de l'activité professionnelle et de l'ethnie.

Il n'y a pas d'association significative entre la TA élevée et le niveau d'instruction (p=0,3). La TA élevée était significativement plus importante chez les sujets invalides (p<10<sup>-4</sup>) et chez les sujets d'ethnie yoruba (p=10<sup>-8</sup>).



**Tableau XXX :** prévalence de la tension artérielle élevée en fonction du niveau d'instruction, de l'activité professionnelle et de l'ethnie au Bénin en 2008

| Variables                       | TA élevée |             | TA normale | Total | p                  |                    |
|---------------------------------|-----------|-------------|------------|-------|--------------------|--------------------|
|                                 | n         | %           | n          |       |                    |                    |
| <b>Niveau d'instruction</b>     |           |             |            |       |                    |                    |
| Aucune instruction              | 1200      | 28,0        | 3090       | 4290  | 0,3                |                    |
| primaire                        | 498       | <b>28,3</b> | 1263       | 1761  |                    |                    |
| secondaire                      | 166       | 24,4        | 513        | 679   |                    |                    |
| universitaire                   | 35        | 20,1        | 139        | 174   |                    |                    |
| <b>Activité professionnelle</b> |           |             |            |       |                    |                    |
| Employé de l'Etat               | 61        | 26,7        | 169        | 230   | < 10 <sup>-4</sup> |                    |
| Employé du Privé                | 72        | 25,9        | 206        | 278   |                    |                    |
| Indépendant                     | 1466      | 27,1        | 3942       | 5408  |                    |                    |
| Bénévole                        | 4         | 15,4        | 22         | 26    |                    |                    |
| Etudiant                        | 17        | 16,8        | 84         | 645   |                    |                    |
| Maitre (esse)                   | 193       | 29,9        | 452        | 114   |                    |                    |
| Retraité                        | 47        | 41,2        | 67         | 101   |                    |                    |
| Chômeur                         | 13        | 26,5        | 36         | 49    |                    |                    |
| Invalide                        | 26        | <b>49,1</b> | 27         | 53    |                    |                    |
| <b>Ethnie</b>                   |           |             |            |       |                    |                    |
| Adja                            | 320       | 30,5        | 730        | 1050  |                    | < 10 <sup>-8</sup> |
| Fon                             | 773       | 27,9        | 1996       | 2769  |                    |                    |
| Bariba                          | 230       | 25,4        | 674        | 904   |                    |                    |
| Dendi                           | 99        | 29,6        | 236        | 335   |                    |                    |
| Yom                             | 53        | 21,2        | 197        | 250   |                    |                    |
| Peuhl                           | 53        | 19,3        | 222        | 275   |                    |                    |
| Otamari                         | 37        | 15,2        | 206        | 243   |                    |                    |
| Yoruba                          | 316       | <b>32,3</b> | 662        | 978   |                    |                    |
| Autres                          | 18        | 18,0        | 82         | 100   |                    |                    |
| <b>Total</b>                    | 1899      | 27,51       | 5005       | 6904  |                    |                    |

### Prévalence de la tension artérielle élevée en fonction des départements du Bénin en 2008

Le tableau XXXIX résume la prévalence de la TA élevée en fonction des différents départements du Bénin. Cette prévalence était significativement plus élevée dans le département de l'Ouémé ( $p=10^{-5}$ ).

**Tableau XXXI :** prévalence de la tension artérielle élevée en fonction des différents départements du Bénin en 2008

| Départements | Effectif   | TA élevée  | Prévalence (%) |
|--------------|------------|------------|----------------|
| <b>Ouémé</b> | <b>693</b> | <b>269</b> | <b>38,82</b>   |
| Plateau      | 467        | 150        | 32,12          |
| Atlantique   | 914        | 220        | 24,07          |
| Littoral     | 585        | 150        | 25,64          |
| Mono         | 344        | 123        | 35,76          |
| Couffo       | 574        | 170        | 29,62          |
| Zou          | 687        | 158        | 23,00          |
| Collines     | 572        | 164        | 28,67          |
| Borgou       | 687        | 161        | 23,44          |
| Alibori      | 462        | 112        | 24,24          |
| Atacora      | 574        | 133        | 23,17          |
| Donga        | 345        | 89         | 25,80          |

### Répartition des sujets en fonction des différents stades de la tension artérielle élevée de l'OMS au Bénin en 2008

Le tableau XL résume la répartition des sujets enquêtés en fonction des différents stades de l'hypertension artérielle de l'OMS. Plus de deux sujets sur trois avaient une TA élevée au stade 1.

**Tableau XXXII :** Répartition des sujets enquêtés selon les différents stades de la TA élevée de l'OMS au Bénin en 2008

| Stades de TA élevée | n           | %            |
|---------------------|-------------|--------------|
| Stade 1             | 1352        | <b>71,2</b>  |
| Stade 2             | 439         | 23,1         |
| Stade 3             | 108         | 5,7          |
| <b>Total</b>        | <b>1899</b> | <b>100,0</b> |

### **Répartition des sujets ayant une TA élevée en fonction de la consommation de fruits et légumes au Bénin en 2008**

Parmi les 1899 sujets ayant une TA élevée, 1507 consommaient moins de cinq portions de fruits et légumes, soit une proportion de 79,35%. Cette répartition est résumée dans le tableau XLII.

**Tableau XXXIII:** Répartition des sujets ayant une TA élevée en fonction de la consommation de fruits et légumes (FL) au Bénin en 2008

| <b>Variables</b> | <b>TA élevée</b> |          |
|------------------|------------------|----------|
|                  | <b>n</b>         | <b>%</b> |
| FL $\geq$ 5      | 392              | 20,65    |
| FL<5             | 1507             | 79,35    |
| Total            | 100,0            | 1899     |

### **Répartition des sujets ayant une TA élevée en fonction de la consommation nocive d'alcool au Bénin en 2008**

Parmi les 1899 sujets ayant une TA élevée, 27 consommaient une quantité nocive d'alcool, soit une proportion de 1,42%. Le tableau XLII résume les informations relatives à cette répartition.

**Tableau XXXIV :** Répartition des sujets ayant une TA élevée en fonction de la consommation nocive d'alcool au Bénin en 2008

| <b>Variables</b>    | <b>TA élevée</b> |              |
|---------------------|------------------|--------------|
|                     | <b>n</b>         | <b>%</b>     |
| Consommation nocive | 27               | 1,42         |
| Abstinentes         | 1872             | <b>98,58</b> |
| Total               | 1899             | 100,00       |

### **Répartition des sujets ayant une TA élevée en fonction de l'obésité au Bénin en 2008**

Trois cents (300) sujets parmi les 1899 ayant une TA élevée étaient obèses, soit une proportion de 15,8%. Voir tableau XLIII.

**Tableau XXXV:** Répartition des sujets ayant une TA élevée en fonction de l'obésité au Bénin en 2008

| Variables  | TA élevée |       |
|------------|-----------|-------|
|            | n         | %     |
| Obèses     | 300       | 15,8  |
| Non obèses | 1599      | 84,2  |
| total      | 1899      | 100,0 |

Répartition des sujets enquêtés au Bénin en 2008 selon qu'ils aient reçu des conseils relatifs au mode de vie par un médecin ou un agent de santé pour une TA élevée

Parmi les sujets enquêtés qui avaient une TA élevée, environ un sur deux (48,60%) avait reçu des conseils relatifs au régime alimentaire et chez environ 1 sujet sur 4 (23,70%) une perte de poids avait été conseillée. La figure2 résume l'ensemble de ces informations.

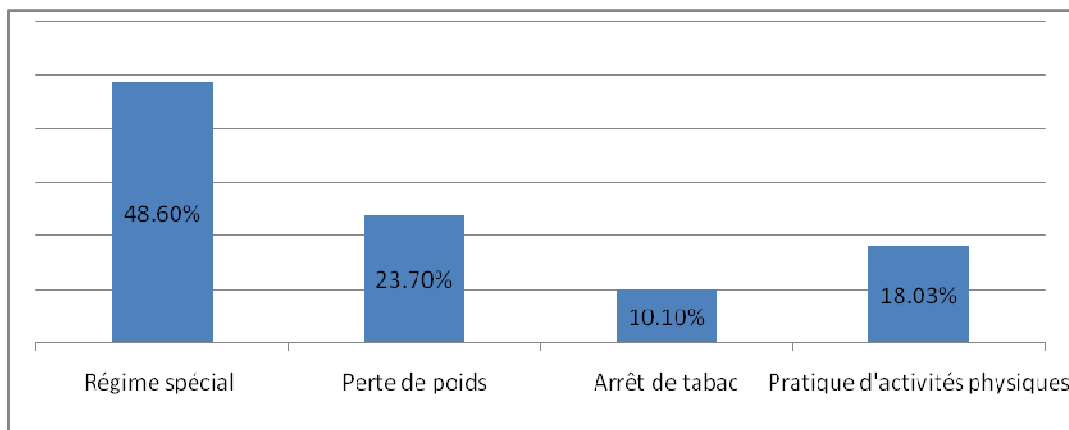

**Figure 2 :** Répartition des sujets enquêtés selon qu'ils aient reçu des conseils relatifs au mode de vie par un médecin ou un agent de santé pour une TA élevée.

Répartition des sujets enquêtés présentant une tension artérielle élevée en fonction de leurs antécédents au Bénin en 2008

Le tableau XLIV résume l'ensemble des informations relatives aux antécédents des sujets présentant une tension artérielle élevée. Plus de trois sujets sur quatre ne se savaient pas hypertendus (77,5%). Plus de quatre sur

cinq avaient rapporté que leur dernière prise de la TA a été effectuée depuis plus de 10 ans. 81,6% d'entre eux n'avaient pas pris leur médicament antihypertenseur durant les deux dernières semaines qui ont précédé l'enquête.

**Tableau XXXVI:** Répartition des sujets enquêtés ayant une TA élevée en fonction de leurs antécédents au Bénin en 2008

| <b>Antécédents</b>                                                       | <b>n</b> | <b>%</b>    |
|--------------------------------------------------------------------------|----------|-------------|
| <b>Connaissance antérieure de la TA</b>                                  |          |             |
| <b>Elevée ces 12 derniers mois</b>                                       |          |             |
| Oui                                                                      | 416      | 22,5        |
| Non                                                                      | 1483     | <b>77,5</b> |
| <b>Dernière prise de la TA</b>                                           |          |             |
| ≤ 12 mois                                                                | 580      | 30,6        |
| Entre 1et 5 ans                                                          | 540      | 28,4        |
| >10 ans                                                                  | 779      | <b>41,0</b> |
| <b>Prise de médicaments antiHTA au cours des deux dernières semaines</b> |          |             |
| Oui                                                                      | 349      | 18,4        |
| Non                                                                      | 1550     | <b>81,6</b> |
| <b>total</b>                                                             | 1899     | 100,0       |

## **5.7 Prévalence de la surcharge pondérale et de l'obésité au Bénin en 2008**

### 5.7.1 Prévalence de l'obésité

Sur l'effectif des 6904 sujets enquêtés, 649 étaient obèses soit une prévalence 9,40% [IC95% : 8,72%-10,12%]. Dans le groupe des 3485 sujets de sexe masculin, 151 étaient obèses, soit une prévalence de 4,33%. Parmi les 3419 sujets de sexe féminin, 479 avaient une obésité, soit une prévalence de 14,01%. Les femmes étaient significativement plus obèses que les hommes ( $p=10^{-7}$ ).

Au sein des 4545 sujets résidant en milieu urbain, 533 étaient obèses (11,7%) versus (4,9%) en milieu rural (116/2359). La prévalence de l'obésité était significativement plus élevée en milieu urbain ( $p < 10^{-8}$ ).

Parmi les 649 sujets obèses, 90 avaient une obésité morbide, soit une proportion de 13,8%, 253 avaient une obésité androïde, soit une proportion de 38,7%, 396 avaient une obésité gynoïde, soit une proportion de 61%

Dans l'étude, 2437 personnes sur les 6904 enquêtées avaient une obésité abdominale, soit une prévalence de 35,3%.

Le tableau XLV montre la prévalence de l'obésité en fonction de l'âge. Cette prévalence augmentait significativement avec l'âge jusqu'à 54 ans ( $p < 10^{-8}$ ).

**Tableau XXXVII:** Prévalence de l'obésité en fonction de l'âge au Bénin en 2008

| Age          | Obèses |              | Non obèses | Total |
|--------------|--------|--------------|------------|-------|
|              | n      | %            | n          |       |
| 25-34        | 131    | 6,04         | 2036       | 2167  |
| 35- 44       | 125    | 7,45         | 1552       | 1677  |
| 45- 54       | 172    | <b>14,58</b> | 1007       | 1179  |
| 55- 64       | 221    | 11,75        | 1660       | 1881  |
| <b>Total</b> | 649    | 9,40         | 6255       | 6904  |

**Prévalence de l'obésité en fonction du niveau d'instruction, de l'activité professionnelle et de l'ethnie au Bénin en 2008**

La prévalence de l'obésité était significativement plus élevée chez les sujets ayant un niveau secondaire d'instruction ( $10^{-8}$ ), les bénévoles ( $10^{-8}$ ) et chez les sujets d'ethnie Fon ( $10^{-8}$ ). Voir tableau XLVI.

**Tableau XXXVIII:** prévalence de l'obésité en fonction du niveau d'instruction, de l'activité professionnelle et de l'ethnie au Bénin en 2008

| Variables                   | Obèses |             | Non obèses | Total | p                |
|-----------------------------|--------|-------------|------------|-------|------------------|
|                             | n      | %           | n          |       |                  |
| <b>Niveau d'instruction</b> |        |             |            |       |                  |
| Aucun                       | 325    | 7,6         | 3965       | 4290  | 10 <sup>-8</sup> |
| Primaire                    | 208    | 11,8        | 1553       | 1761  |                  |
| <b>Secondaire</b>           | 101    | <b>14,8</b> | 578        | 679   |                  |
| Universitaire               | 15     | 8,6         | 159        | 174   |                  |
| <b>Profession</b>           |        |             |            |       |                  |
| Employé de l'Etat           | 21     | 9,1         | 209        | 230   | 10 <sup>-8</sup> |
| Employé du Privé            | 23     | 8,3         | 255        | 278   |                  |
| Indépendant                 | 501    | 9,3         | 4907       | 5408  |                  |
| <b>Bénévole</b>             | 6      | <b>23,1</b> | 20         | 26    |                  |
| Etudiant                    | 5      | 5,0         | 96         | 101   |                  |
| Maîtresse de maison         | 70     | 10,9        | 575        | 645   |                  |
| Retraité                    | 14     | 12,3        | 100        | 114   |                  |
| Chômeur                     | 3      | 6,1         | 46         | 49    |                  |
| Invalide                    | 6      | 11,3        | 47         | 53    |                  |
| <b>Ethnie</b>               |        |             |            |       |                  |
| Adja et apparentés          | 98     | 10,3        | 952        | 1050  | 10 <sup>-8</sup> |
| Fon et apparentés           | 305    | 11,0        | 2464       | 2769  |                  |
| Bariba et apparentés        | 60     | 6,6         | 842        | 904   |                  |
| Dendi et apparentés         | 26     | 7,8         | 309        | 335   |                  |
| Yom                         | 10     | 4,0         | 240        | 250   |                  |
| Peuhl                       | 11     | 4,0         | 264        | 275   |                  |
| <b>Otamari</b>              | 27     | <b>11,1</b> | 216        | 243   |                  |
| Yoruba                      | 108    | 11,0        | 870        | 978   |                  |
| Autres                      | 4      | 4,0         | 96         | 100   |                  |
| <b>Total</b>                | 649    | 9,4         | 6255       | 6904  |                  |

### Prévalence de l'obésité en fonction des départements au Bénin en 2008

Le tableau XLVII résume la prévalence de l'obésité dans les différents départements du Bénin. Cette prévalence était significativement élevée dans le département du Littoral (p=10<sup>-8</sup>).

**Tableau XXXIX:** prévalence de l'obésité en fonction des départements au Bénin en 2008

| Départements    | obésité |             | Total |
|-----------------|---------|-------------|-------|
|                 | n       | %           |       |
| Ouémé           | 90      | 13,0        | 693   |
| Plateau         | 51      | 10,9        | 467   |
| Atlantique      | 104     | 11,4        | 914   |
| <b>Littoral</b> | 115     | <b>19,7</b> | 585   |
| Mono            | 19      | 5,5         | 344   |
| Couffo          | 47      | 8,2         | 574   |
| Zou             | 45      | 6,6         | 687   |
| Collines        | 60      | 10,5        | 572   |
| Borgou          | 55      | 8,0         | 687   |
| Alibori         | 15      | 3,2         | 462   |
| Atacora         | 29      | 5,1         | 574   |
| Donga           | 19      | 5,5         | 345   |
| Total           | 649     | 9,4         | 6904  |

### 5.7.2 Prévalence de la surcharge pondérale

Parmi les 6904 sujets enquêtés, 1415 étaient en surpoids, soit une prévalence de 20,50% [IC95% :19,55%-21,47%]. Au sein des 3485 sujets de sexe masculin, 587 avaient une surcharge pondérale soit une prévalence de 16,8%. Les 788 sujets de sexe féminin en surcharge pondérale représentaient 23,04 %. La prévalence de la surcharge pondérale était significativement plus élevée chez les sujets de sexe féminin ( $p= 10^{-7}$ ).

Le tableau XLVIII montre la prévalence de la surcharge pondérale en fonction de l'âge. Cette prévalence augmentait significativement avec l'âge jusqu'à 54 ans ( $p<10^{-4}$ ).



**Tableau XL:** prévalence de la surcharge pondérale en fonction de l'âge au Bénin en 2008

| Age           | Surpoids + |             | Surpoids - | Total |
|---------------|------------|-------------|------------|-------|
|               | n          | %           | n          |       |
| 25-34         | 302        | 13,9        | 1865       | 2167  |
| 35- 44        | 401        | 23,9        | 1276       | 1677  |
| <b>45- 54</b> | 318        | <b>27,0</b> | 861        | 1179  |
| 55- 64        | 394        | 20,9        | 1487       | 1881  |
| <b>Total</b>  | 1415       |             |            | 6904  |

**Prévalence de la surcharge pondérale en fonction de l'activité professionnelle et de l'ethnie au Bénin en 2008**

Le tableau XLIL résume les informations relatives à la prévalence de la surcharge pondérale en fonction de l'activité professionnelle et de l'ethnie. Elle était significativement plus élevée chez les sujets bénévoles ( $p < 10^{-8}$ ) et chez les sujets, d'ethnie dendi ( $p < 10^{-4}$ ).

**Tableau XXLIIL:** Prévalence de la surcharge pondérale en fonction de l'activité professionnelle et de l'ethnie au Bénin en 2008

| Variables          | Surpoids+ (%) |             | Surpoids(-) | Total | p                |
|--------------------|---------------|-------------|-------------|-------|------------------|
|                    | n             | %           | n           |       |                  |
| <b>Profession</b>  |               |             |             |       | 10 <sup>-8</sup> |
| Employé de l'Etat  | 74            | 32,1        | 156         | 230   |                  |
| Employé du Privé   | 75            | 26,9        | 203         | 278   |                  |
| Indépendant        | 1050          | 19,4        | 4358        | 5408  |                  |
| <b>Bénévole</b>    | 17            | <b>65,4</b> | 9           | 26    |                  |
| Etudiant           | 11            | 10,9        | 90          | 101   |                  |
| Maitre(sse) maison | 134           | 26,2        | 511         | 645   |                  |
| Retraité           | 30            | 26,3        | 84          | 114   |                  |
| Chômeur            | 7             | 14,3        | 42          | 49    |                  |
| Invalide           | 17            | 32,1        | 36          | 53    |                  |
| <b>Ethnie</b>      |               |             |             | 1050  | 10 <sup>-4</sup> |
| Adja et apparentés | 202           | 19,2        | 848         |       |                  |
| Fon et apparentés  | 584           | 21,1        | 2185        | 2769  |                  |
| Bariba             | 183           | 20,2        | 721         | 904   |                  |
| <b>Dendi</b>       | 80            | <b>23,9</b> | 255         | 335   |                  |
| Yom                | 35            | 14,0        | 215         | 250   |                  |
| Peuhl              | 34            | 12,4        | 241         | 275   |                  |
| Otamari            | 32            | 13,2        | 211         | 243   |                  |
| Yoruba             | 209           | 21,4        | 769         | 978   |                  |
| Autres             | 16            | 16,0        | 84          | 100   |                  |
| <b>Total</b>       | 1415          | 20,5        | 5489        | 6904  |                  |

### 5.7.3 Répartition des sujets enquêtés en fonction de l'indice de masse corporelle au Bénin en 2008

La figure 3 montre la répartition des sujets enquêtés en fonction de leur indice masse corporelle.

Plus d'un sujet sur 5 (20,5%) avaient une surcharge pondérale et moins d'un sujet sur dix (8,10%) était maigre.

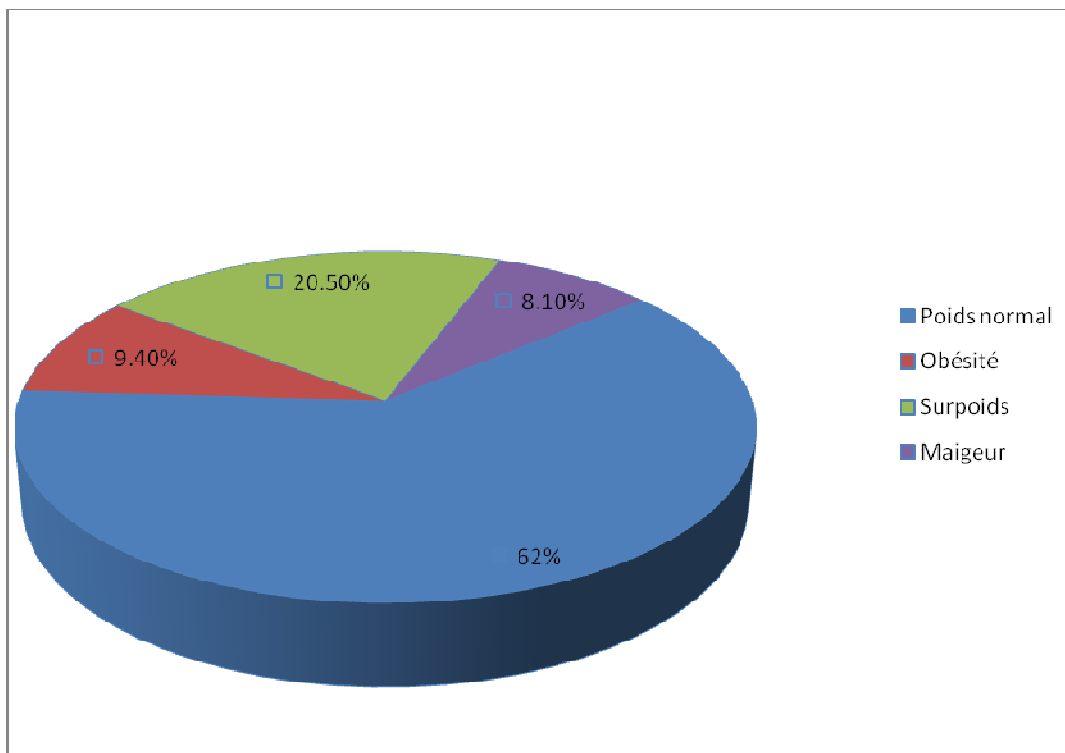

**Figure 3:** Répartition des sujets enquêtés en fonction de l'indice de masse corporelle au Bénin en 2008

**STEP III**



## 5.8 Prévalence de l'hyperglycémie

Sur les 3822 sujets prélevés, 101 avaient une hyperglycémie de type diabétique soit une prévalence de 2,6% [IC 95% = 2,2-3,2].

Parmi ces derniers, 74 soit 73,27% ne se savaient pas diabétiques. La glycémie à jeun anormale avait été retrouvée chez 110 sujets soit 2,9% [IC 95% ; 2,4-3,4].

Sur 1854 sujets de sexe masculin, 61 avaient une hyperglycémie de type diabétique soit 3,3% versus 2,0% (40 /1968) chez les sujets de sexe féminin ( $p < 0,05$ ).

Sur 1332 sujets résidant en milieu urbain ; 51 avaient une hyperglycémie soit une prévalence de 3,8% versus 2,0% en milieu rural (50 sujets sur 2490) ;( $p < 10^{-3}$ ).

Le Tableau XLIII montre la prévalence de la glycémie anormale à jeun et de l'hyperglycémie de type diabétique en fonction de l'âge. La prévalence de l'hyperglycémie de type diabétique est significativement plus élevée chez les sujets de 45 à 54 ans ( $p < 10^{-3}$ ). En ce qui concerne la glycémie anormale à jeun, il n'a pas pu être mis en évidence une différence significative entre le taux de glycémie et l'âge des patients ( $p=0,4$ )

**Tableau XLIII:** Prévalence de l'hyperglycémie et de la glycémie anormale a jeun en fonction de l'âge au Bénin en 2008.

| Tranche d'âge<br>(ans) | Hyperglycémie jeun<br>anormale |            | Hyperglycémie de<br>type diabétique |            | Total |
|------------------------|--------------------------------|------------|-------------------------------------|------------|-------|
|                        | n                              | %          | n                                   | %          |       |
| 25 – 34                | 28                             | 2,5        | 19                                  | 1,7        | 1112  |
| 35 – 44                | 34                             | 3,6        | 15                                  | 1,6        | 935   |
| 45 – 54                | 18                             | 2,6        | 27                                  | 3,9        | 699   |
| <b>55 – 64</b>         | 30                             | <b>2,8</b> | 40                                  | <b>3,7</b> | 1076  |
| <b>Total</b>           | 110                            | 2,9        | 101                                 | 2,6        | 3822  |

## Prévalence de l'hyperglycémie de type diabétique et de la glycémie anormale à jeun en fonction du département au Bénin en 2008

Le Tableau XLIV résume la prévalence de la glycémie à jeun anormale et de l'hyperglycémie de type diabétique dans les douze départements. La prévalence la plus élevée a été observée dans le département du Borgou (4,6%) et la plus faible a été retrouvée dans les départements de l'Ouémé (0,9%).

**Tableau XLIV :** Prévalence de la glycémie à jeun anormale et de l'hyperglycémie de type diabétique en fonction du département au Bénin en 2008.

| Départements   | Hyperglycémie à jeun anormale |            | Hyperglycémie de type diabétique |            | Total |
|----------------|-------------------------------|------------|----------------------------------|------------|-------|
|                | n                             | %          | n                                | %          |       |
| <b>Alibori</b> | 26                            | <b>7,9</b> | 8                                | 2,4        | 330   |
| Atacora        | 19                            | 6,0        | 12                               | 3,8        | 316   |
| Atlantique     | 9                             | 1,7        | 15                               | 2,9        | 514   |
| <b>Borgou</b>  | 17                            | 4,6        | 17                               | <b>4,6</b> | 373   |
| Collines       | 8                             | 2,2        | 9                                | 2,5        | 358   |
| Couffo         | 9                             | 2,7        | 8                                | 2,4        | 333   |
| Donga          | 4                             | 2,5        | 5                                | 3,1        | 162   |
| Littoral       | 26                            | 7,9        | 8                                | 2,4        | 330   |
| Mono           | 2                             | 1,2        | 2                                | 1,2        | 172   |
| Ouémé          | 5                             | 1,2        | 4                                | 0,9        | 422   |
| Plateau        | 1                             | 0,4        | 6                                | 2,6        | 227   |
| Zou            | 3                             | 0,8        | 10                               | 2,7        | 371   |
| Total          | 110                           | 2,9        | 101                              | 2,6        | 3822  |

## Prévalence de l'hyperglycémie au Bénin selon l'ethnie

Le tableau LII résume la prévalence de la glycémie à jeun anormale et de l'hyperglycémie selon l'ethnie. La prévalence d'hyperglycémie la plus forte a été observée chez les sujets d'ethnie Otamari (6,8%).

**Tableau XLV:** Prévalence de la glycémie anormale à jeun et de l'hyperglycémie de type diabétique au Bénin en 2008

| Ethnie              | Glycémie à jeun anormale |            | Hyperglycémie de type diabétique |            | Total |
|---------------------|--------------------------|------------|----------------------------------|------------|-------|
|                     | n                        | %          | n                                | %          |       |
| Adja                | 15                       | 2,6        | 12                               | 2,1        | 581   |
| Fon                 | 41                       | 2,6        | 35                               | 2,2        | 1582  |
| Bariba              | 27                       | <b>5,6</b> | 15                               | 3,1        | 483   |
| Dendi               | 5                        | 2,9        | 6                                | 3,4        | 173   |
| Yom                 | 4                        | 3,3        | 4                                | 3,3        | 120   |
| Peulh               | 4                        | 2,6        | 3                                | 2,0        | 151   |
| <b>Otamari</b>      | 7                        | 5,2        | 8                                | <b>6,8</b> | 133   |
| Yoruba              | 7                        | 1,2        | 13                               | 2,3        | 558   |
| Africain de l'ouest | 0                        | 0          | 0                                | 0          | 41    |
| <b>Total</b>        | 110                      | 2,9        | 101                              | 2,6        | 3822  |

#### **Prévalence l'hyperglycémie selon le niveau d'instruction**

Sur les 92 sujets de niveau universitaire, 6 avaient une hyperglycémie, soit 6,5% versus 1,8% chez les sujets n'ayant aucune instruction officielle. La prévalence de l'hyperglycémie croît significativement avec le niveau d'instruction

( $p < 0,05$ ). La prévalence de l'hyperglycémie de type diabétique et de la glycémie anormale à jeun selon le niveau d'instruction est présentée dans le Tableau XLVI.



**Tableau XLVI:** Prévalence de la glycémie à jeun anormale et de l'hyperglycémie de type diabétique selon le niveau d'instruction au Bénin en 2008.

| Niveau d'instruction | Glycémie à jeun anormal |            | Hyperglycémie de type diabétique |            | Total |
|----------------------|-------------------------|------------|----------------------------------|------------|-------|
|                      | n                       | %          | n                                | %          |       |
| Aucune               | 56                      | 2,4        | 43                               | 1,8        | 2350  |
| primaire             | 29                      | 3,0        | 30                               | 3,0        | 983   |
| <b>Secondaire</b>    | 21                      | <b>4,8</b> | 22                               | 5,5        | 397   |
| Université           | 4                       | 4,3        | 6                                | <b>6,5</b> | 92    |
| <b>Total</b>         | 110                     | 2,9        | 101                              | 2,6        | 3822  |

**Prévalence de l'hyperglycémie de type diabétique et de la glycémie anormale à jeun selon l'activité professionnelle**

Le Tableau XLVII résume la prévalence de la glycémie à jeun anormale et de l'hyperglycémie de type diabétique selon l'activité professionnelle. Parmi les 34 sujets invalides sur le plan professionnel, 3 avaient une hyperglycémie ; soit une prévalence de 8,8% versus 0% chez les sujets bénévoles. La différence observée est significative ( $p < 10^{-3}$ ).

**Tableau XLVII:** Prévalence de la glycémie à jeun anormale et de l'hyperglycémie de type diabétique selon l'activité professionnelle au Bénin en 2008.

| Activité professionnelle | Glycémie anormale à jeun |            | Hyperglycémie de type diabétique |            | Total |
|--------------------------|--------------------------|------------|----------------------------------|------------|-------|
|                          | n                        | %          | n                                | %          |       |
| Employé(e) de l'état     | 7                        | 5,1        | 10                               | 7,2        | 138   |
| Employé(e) du privé      | 1                        | 0,8        | 4                                | 3,1        | 130   |
| Indépendant(e)           | 86                       | 2,9        | 74                               | 2,5        | 2984  |
| Bénévole                 | 0                        | 0          | 0                                | 0          | 13    |
| Etudiant(e)              | 1                        | 1,9        | 2                                | 3,8        | 52    |
| Maitre(sse)de maison     | 11                       | 3,1        | 3                                | 0,8        | 358   |
| Retraité(e)              | 0                        | 0          | 3                                | 3,8        | 79    |
| <b>Chômeur</b>           | 2                        | <b>5,9</b> | 2                                | 5,9        | 34    |
| <b>Invalide</b>          | 1                        | 2,9        | 3                                | <b>8,8</b> | 34    |
| <b>Total</b>             | 110                      | 2,9        | 101                              | 2,6        | 3822  |

## 5.9 Prévalence de l'hypercholestérolémie

Sur 3822 sujets prélevés, 68 sujets ont une hypercholestérolémie soit 1,8% [IC 95% =1,4-2,2]. La cholestérolémie totale élevée a été retrouvée chez 233sujets soit 6,1% [IC 95% =5,4-6,9].

Parmi les 1968 sujets de sexe féminin, 38 avaient une hypercholestérolémie soit 1,9% versus 1,6% chez les sujets de sexe masculin, (p=0,46).

Sur 1332 sujets résidant en zone urbaine, 26 avaient une hypercholestérolémie soit une prévalence de 1,9% versus 1,7% en zone rurale (42sujets sur 2490) p<10-3.

### Prévalence de l'hypercholestérolémie et de la cholestérolémie totale élevée en fonction de l'âge au Bénin en 2008.

Sur 935 sujets de la tranche d'âge de 35 à 44 ans, 15 avaient une l'hypercholestérolémie soit une prévalence de 1,6%. La prévalence croît significativement avec l'âge (P= 0,02). Le Tableau XLVIII résume Prévalence de l'hypercholestérolémie et de la cholestérolémie totale en fonction de l'âge

**Tableau XLVIII:** Prévalence de l'hypercholestérolémie et de cholestérolémie totale élevée en fonction de l'âge au Bénin en 2008

| Tranches d'âges (ans) | CT élevé |            | hypercholestérolémie |            | Total |
|-----------------------|----------|------------|----------------------|------------|-------|
|                       | n        | %          | n                    | %          |       |
| 25-34                 | 30       | 2,7        | 10                   | 0,9        | 1112  |
| 35-44                 | 65       | 7,0        | 15                   | 1,6        | 935   |
| 45-54                 | 48       | 6,9        | 15                   | 2,1        | 699   |
| 55-64                 | 90       | <b>8,4</b> | 28                   | <b>2,6</b> | 1076  |
| <b>Total</b>          | 233      | 6,1        | 68                   | 1,8        | 3822  |

### Prévalence de l'hypercholestérolémie et de cholestérolémie totale élevée en fonction du département au Bénin en 2008

Le Tableau XLIX résume la prévalence de l'hypercholestérolémie en fonction du département. La prévalence la plus élevée a été observée dans le département du Zou (3,0 %).

**Tableau XLIX:** Prévalence l'hypercholestérolémie par département au Bénin en 2008

| Département  | CT élevé |            | Hypercholestérolémie |            | Total |
|--------------|----------|------------|----------------------|------------|-------|
|              | n        | %          | n                    | %          |       |
| Plateau      | 8        | 3,5        | 4                    | 1,8        | 227   |
| Atlantique   | 44       | 8,6        | 9                    | 1,7        | 514   |
| Alibori      | 4        | 1,6        | 5                    | 2,0        | 244   |
| <b>Zou</b>   | 12       | 3,2        | 11                   | <b>3,0</b> | 371   |
| Littoral     | 31       | 9,4        | 5                    | 1,5        | 330   |
| Mono         | 16       | 9,3        | 2                    | 1,2        | 172   |
| <b>Ouémé</b> | 40       | <b>9,5</b> | 8                    | 1,9        | 422   |
| Couffo       | 24       | 7,2        | 6                    | 1,8        | 333   |
| Collines     | 18       | 5,0        | 9                    | 2,5        | 358   |
| Borgou       | 22       | 5,9        | 3                    | 0,8        | 373   |
| Atacora      | 5        | 1,6        | 2                    | 0,6        | 316   |
| Donga        | 9        | 5,6        | 4                    | 2,5        | 162   |
| <b>Total</b> | 233      | 6,1        | 68                   | 1,8        | 3822  |

### Prévalence de l'hypercholestérolémie selon l'ethnie au Bénin en 2008

La prévalence de l'hypercholestérolémie selon l'ethnie est présentée dans le Tableau L . La prévalence la plus forte est observée chez les sujets d'ethnie Dendi.

**Tableau L:** Prévalence de l'hypercholestérolémie au Bénin selon l'ethnie

| Ethnie         | CT élevée |            | hypercholestérolémie |            | Total |
|----------------|-----------|------------|----------------------|------------|-------|
|                | n         | %          | N                    | %          |       |
| Adja           | 41        | 7,1        | 8                    | 1,4        | 581   |
| <b>Fon</b>     | 115       | <b>7,3</b> | 31                   | 2,0        | 1582  |
| Bariba         | 20        | 4,1        | 5                    | 1,0        | 483   |
| Dendi          | 9         | 5,2        | 4                    | 2,3        | 173   |
| Yom            | 3         | 2,5        | 1                    | 0,8        | 120   |
| Peulh          | 2         | 1,3        | 2                    | 1,3        | 151   |
| Otamari        | 2         | 1,5        | 2                    | 1,5        | 133   |
| <b>Yorouba</b> | 38        | 6,8        | 15                   | <b>2,7</b> | 558   |
| Ouest-africain | 3         | <b>7,3</b> | 0                    | 0          | 41    |
| Autres         | 0         | 0          | 0                    | 0          | 0     |
| <b>Total</b>   | 233       | 6,1        | 68                   | 1,8        | 3822  |

**Prévalence selon le niveau d'instruction au Bénin en 2008**

La prévalence de l'hypercholestérolémie est de 1,6% chez les sujets sans instruction officielle. Cette prévalence croissait avec le niveau d'instruction mais une inflexion a été observée chez les sujets de niveau universitaire  $p= 0,5$ .

Le Tableau LI résume la prévalence de l'hypercholestérolémie selon le niveau d'instruction.

**Tableau LI:** Prévalence de l'hypercholestérolémie selon le niveau d'instruction au Bénin en 2008

| Niveau d'instruction | CT élevé |             | Hypercholestérolémie |            | Total |
|----------------------|----------|-------------|----------------------|------------|-------|
|                      | n        | %           | n                    | %          |       |
| Aucune               | 125      | 5,3         | 38                   | 1,6        | 2350  |
| Primaire             | 63       | 6,4         | 19                   | 1,9        | 983   |
| <b>Secondaire</b>    | 35       | 8,8         | 10                   | <b>2,5</b> | 397   |
| <b>Université</b>    | 10       | <b>10,9</b> | 1                    | 1,1        | 92    |
| <b>Total</b>         | 233      | 6,1         | 68                   | 1,8        | 3822  |

### Prévalence selon l'activité professionnelle

La prévalence est plus élevée chez les invalides (5,9 %) suivie par les retraités (3,8 %). Le Tableau LII résume la prévalence de l'hypercholestérolémie selon l'activité professionnelle (p=0,13).

**Tableau LII:** Prévalence de l'hypercholestérolémie selon l'activité professionnelle

| Activité professionnelle | CT élevé |             | Hypercholestérolémie |            | Total |
|--------------------------|----------|-------------|----------------------|------------|-------|
|                          | n        | %           | n                    | %          |       |
| Employé de l'état        | 12       | 8,7         | 4                    | 2,9        | 138   |
| Employé du privé         | 7        | 5,4         | 2                    | 1,5        | 130   |
| Indépendant              | 172      | 5,8         | 46                   | 1,5        | 2984  |
| Bénévole                 | 0        | 0           | 0                    | 0          | 13    |
| Etudiant                 | 1        | 1,9         | 0                    | 0          | 52    |
| Maitre de maison         | 24       | 6,7         | 11                   | 3,1        | 358   |
| Retraité                 | 8        | 10,1        | 3                    | 3,8        | 79    |
| <b>Chômeur</b>           | 5        | <b>14,7</b> | 0                    | 0          | 34    |
| <b>Invalide</b>          | 3        | 8,8         | 2                    | <b>5,9</b> | 34    |
| <b>Total</b>             | 233      | 6,1         | 68                   | 1,8        | 3822  |

## Conclusion

Au terme de notre étude, les conclusions suivantes peuvent être dégagées:

- Une proportion non négligeable de la population béninoise est exposée au tabagisme et à la consommation nocive d'alcool.
- Le sexe masculin, l'âge, le niveau d'instruction bas, le milieu rural et le milieu socioculturel sont des facteurs favorisant le tabagisme et la consommation nocive d'alcool au Bénin.
- Le tabagisme favorise la consommation nocive d'alcool et inversement, la consommation nocive d'alcool favorise le tabagisme.
- La prévalence de l'inactivité physique était de 8,3% et celle de la consommation insuffisante de fruits et légumes était de 78,05%.
- Un adulte sur quatre a une tension artérielle élevée et environ un sujet sur dix est obèse.

Le système sanitaire devra faire face au fardeau grandissant lié à ces facteurs de risque, en s'impliquant effectivement dans leur prévention qui constitue la 1<sup>ère</sup> arme contre les MNT. Il s'avère donc important de suivre l'évolution de ces FDR et d'élaborer des plans stratégiques pour les réduire.

## **Recommandations**

A l'issue de notre étude nous formulons les suggestions suivantes :

### **A l'endroit des autorités politico-administratives**

- **Ministère de la santé**
  - ✓ Introduire le dépistage des 8 principaux facteurs de risque des maladies non transmissibles dans les visites médicales chez les enseignants, les étudiants et les élèves.
  - ✓ Investir dans la formation des médecins spécialisés dans les maladies non transmissibles.
  - ✓ Créer des centres de sevrage pour les personnes ayant une dépendance alcool-tabagique et veiller à leur réinsertion socioprofessionnelle.
  - ✓ Sensibiliser la population sur les bienfaits de la consommation de fruits et de légumes et le caractère peu coûteux de l'activité physique.
  - ✓ Créer des environnements favorables à la pratique de l'activité physique de loisir ;
  - ✓ Associer les médecins nutritionnistes dans un proche avenir à la prévention des MNT ;
  - ✓ promouvoir des jardins scolaires pour la production des légumes ;
  - ✓ Veiller à l'accessibilité géographique et financière des fruits et légumes à tous.
- **Ministères de l'intérieur et de la santé**



- ✓ Œuvrer pour la mise en application de l'article 8 de la loi cadre antitabac portant création de lieux non fumeurs.

- **Ministères de l'intérieur et du commerce**

- ✓ Créer des lois qui régularisent la production, la commercialisation et la consommation des boissons alcoolisées.
- ✓ Amener les fabricants de boissons alcoolisées locales à rentrer dans le secteur formel.

- **Ministères de l'enseignement**

- ✓ Sensibiliser par des modules de formation les élèves et étudiants sur les méfaits du tabagisme et de la consommation abusive d'alcool.
- ✓ Initier une recherche pour déterminer les facteurs favorisant la faible prévalence de la TA élevée et de l'obésité chez Peuhls.

- **A l'endroit des agents socio-sanitaires**

- ✓ Introduire la surveillance des 8 principaux facteurs de risque des maladies non transmissibles dans leur pratique quotidienne.
- ✓ Sensibiliser les patients sur les facteurs de risque des MNT en général et sur la consommation de fruits et légumes et l'activité physique en particulier.
- ✓ d'insister sur les aspects bénéfiques de la perte de poids (mieux-être physique, harmonisation du corps sans perdre ses courbes, meilleure image de soi)
- ✓ d'apporter des informations nutritionnelles claires (repas riches en fruits et légumes, pauvres en sel, sucre et graisses). Les spécialistes en

nutrition peuvent être mis à contribution pour élaborer des types de menu en tenant compte des ressources locales.

- ✓ Prendre systématiquement la TA, le poids, la taille, le tour de taille à chaque première consultation.
- ✓ Conseiller aux patients de contrôler leur TA au moins une fois tous les trois mois.
- ✓ Créer un modèle qui promeut la lutte contre l'obésité ;
- ✓ Organiser des séances de dépistage des FDR en population générale ;
- ✓ Inscrire la lutte contre les MNT dans les priorités en matière de Santé ;
- ✓ Doter le PNLMT de ressources nécessaires pour assurer une lutte efficace contre ces FDR.

- **A l'endroit de la population**

- ✓ Pratiquer une activité physique d'intensité modérée au moins 30 minutes 3 fois par semaine. Cette habitude ne doit pas être abandonnée après les 2 premiers niveaux scolaires (primaire, secondaire) ou avec l'âge ;
- ✓ Dédramatiser l'effort lié à l'activité physique au quotidien et mettre en évidence son caractère naturel, facile et ludique ;
- ✓ Réduire les comportements sédentaires ;
- ✓ Avoir un régime alimentaire sain et riche en fruits et légumes (au moins 5 portions par jour) ;
- ✓ Eduquer dès le jeune âge les enfants à la consommation quotidienne de fruits et légumes et à la pratique régulière de l'activité physique.
- ✓ Prendre la TA au moins une fois tous les trois mois, surtout les sujets menant une activité professionnelle indépendante ;
- ✓ Eviter le plus possible les situations de stress ;

- ✓ Consommer des aliments pauvres en graisses, sucre et sel, mais riches en fruits et légumes ;
- ✓ Pratiquer des activités physiques de 30 minutes par jour, trois fois dans la semaine ;
- ✓ Doser la glycémie au moins une fois par an ;
  
- ✓ Réduire de moitié, la consommation de l'alcool et du tabac.

- **A l'endroit du PNLMT**

- ✓ Elaborer des stratégies pour la prévention de la TA élevée et de l'obésité ;
- ✓ Renforcer les compétences en matière de prévention (formation pratique des médecins et paramédicaux pour la prévention et la prise en charge de la TA élevée et l'obésité) ;
- ✓ Organiser des séances de CCC à travers des interviews, des sketches radio ou télédiffusés pour informer la population sur les complications de l'HTA et l'obésité et les facteurs associés ;
- ✓ Promouvoir de façon active, les modes de vie favorables à la santé ;
- ✓ Promouvoir la médecine scolaire, intégrer aux programmes scolaires des modules d'éducation nutritionnelle dès le niveau primaire, promouvoir l'activité physique dans les écoles en collaboration avec les autorités en charge de l'éducation.

## **6 Références bibliographiques**

### **1. The World Health Report**

Global Strategy on Diet, Physical activity  
Geneva, World Health Organisation, 2003

### **2. Report of WHO meeting**

Integrate Management of Cardiovascular Risk.  
Geneva, World Health Organisation, 2002

### **3. LE PEN.C.**

Prévention des maladies cardiovasculaires : une approche médico-économique. *Thérapie* 2001, 56, 125 – 13.

### **4. MS / DNPS / PNLMT**

Rapport de l'enquête STEPS dans le Littoral : Bénin 2007

### **5. OMS.**

Stratégie de Coopération de l'OMS avec les Pays : Bénin : 2004-2008 : 11

### **6. ANCELLE.T.**

Statistique en Epidémiologie. Edit Maloine : Paris : 2002 : 78.

### **7. INSAE**

3ème Recensement Général de la Population et de l'Habitat : 2002

### **8. OMS**

Manuel STEPS : partie 2 : 2-2-18



## Table des matières

|                                                                         |            |
|-------------------------------------------------------------------------|------------|
| <b>Sommaire.....</b>                                                    | <b>ii</b>  |
| <b>LISTE DES TABLEAUX .....</b>                                         | <b>iii</b> |
| <b>LISTE DES FIGURES.....</b>                                           | <b>vi</b>  |
| <b>RESUME .....</b>                                                     | <b>1</b>   |
| <b>1 INTRODUCTION .....</b>                                             | <b>2</b>   |
| <b>2 OBJECTIFS.....</b>                                                 | <b>5</b>   |
| 2.1 Objectif général .....                                              | 5          |
| 2.2 Objectifs spécifiques.....                                          | 5          |
| <b>CADRE DE L'ETUDE.....</b>                                            | <b>6</b>   |
| <b>3 CADRE DE L'ETUDE: (étendue géographique) .....</b>                 | <b>7</b>   |
| 3.1 Description et caractéristique du département de l'Atacora .....    | 7          |
| 3.1.1 Présentation du département .....                                 | 7          |
| 3.1.2 Les infrastructures sociocommunautaires.....                      | 7          |
| 3.2 Description et caractéristique du département de la Donga.....      | 7          |
| 3.2.1 Présentation du département de la Donga.....                      | 7          |
| 3.2.2 Infrastructures sociocommunautaires .....                         | 8          |
| 3.3 Description et caractéristique du département de l'Atlantique ..... | 8          |
| 3.3.1 Présentation du département .....                                 | 8          |
| 3.3.2 Infrastructures socio- communautaires.....                        | 8          |
| 3.4 Description et caractéristique du département du Littoral .....     | 9          |
| 3.4.1 Présentation du département .....                                 | 9          |
| 3.4.2 Infrastructures sociocommunautaires .....                         | 9          |
| 3.5 Description et caractéristique du département du Mono.....          | 9          |
| 3.5.1 Présentation du département .....                                 | 9          |
| 3.5.2 Infrastructures sociocommunautaires .....                         | 10         |
| 3.6 Description et caractéristique du département du Couffo.....        | 10         |
| 3.6.1 Présentation du département .....                                 | 10         |
| 3.6.2 Infrastructures sociocommunautaires .....                         | 10         |

|          |                                                                  |           |
|----------|------------------------------------------------------------------|-----------|
| 3.7      | Description et caractéristique du département du Zou.....        | 10        |
| 3.7.1    | Présentation du département .....                                | 10        |
| 3.7.2    | Infrastructures sociocommunautaires .....                        | 11        |
| 3.8      | Description et caractéristique du département des collines ..... | 11        |
| 3.8.1    | Présentation du département .....                                | 11        |
| 3.8.2    | Infrastructures sociocommunautaires .....                        | 11        |
| 3.9      | Description et caractéristique du département de l'Alibori ..... | 12        |
| 3.9.1    | Présentation du département .....                                | 12        |
| 3.9.2    | Infrastructures sociocommunautaires .....                        | 12        |
| 3.10     | Description et caractéristique du département du Borgou .....    | 12        |
| 3.10.1   | Présentation du département .....                                | 12        |
| 3.10.2   | Infrastructures sociocommunautaires.....                         | 13        |
| 3.11     | Description et caractéristique du département du Plateau .....   | 13        |
| 3.11.1   | Présentation du département .....                                | 13        |
| 3.11.2   | Infrastructures sociocommunautaires .....                        | 13        |
| 3.12     | Description et caractéristique du département de l'Ouémé .....   | 13        |
| 3.12.1   | Présentation du département .....                                | 13        |
| 3.12.2   | Infrastructures sociocommunautaires.....                         | 14        |
|          | <b>METHODE DE L'ETUDE .....</b>                                  | <b>15</b> |
| <b>4</b> | <b>METHODE.....</b>                                              | <b>16</b> |
| 4.1      | Type d'étude.....                                                | 16        |
| 4.2      | Population d'étude.....                                          | 16        |
| 4.3      | Echantillonnage .....                                            | 16        |
| 4.3.1    | Taille échantillon .....                                         | 16        |
|          | <b>La taille obtenue est de : 6853.....</b>                      | <b>16</b> |
| 4.3.2    | Technique d'échantillonnage .....                                | 17        |
| 4.4      | Collecte des données .....                                       | 18        |
| 4.4.1    | L'outil de collecte .....                                        | 18        |
| 4.4.2    | Le matériel.....                                                 | 19        |
| 4.4.3    | Equipe de collecte.....                                          | 19        |
| 4.4.4    | Durée de la collecte.....                                        | 19        |
| 4.4.5    | Déroulement de l'enquête .....                                   | 19        |
| 4.4.6    | Technique de collecte .....                                      | 20        |

|          |                                                                                      |           |
|----------|--------------------------------------------------------------------------------------|-----------|
| 4.4.7    | Difficultés rencontrées .....                                                        | 20        |
| 4.4.8    | Considérations éthiques et consentement éclairé.....                                 | 20        |
| 4.5      | Analyse des données et test statistiques .....                                       | 20        |
|          | <b>RESULTATS .....</b>                                                               | <b>22</b> |
| <b>5</b> | <b>RESULTATS .....</b>                                                               | <b>23</b> |
| 5.1      | Description de la population d'étude.....                                            | 23        |
|          | <b>STEP 1 .....</b>                                                                  | <b>25</b> |
| 5.2      | Prévalence du tabagisme.....                                                         | 26        |
| 5.2.1    | Prévalence de la consommation quotidienne de tabac .....                             | 26        |
| 5.2.2    | Prévalence de la consommation de tabac fumé .....                                    | 27        |
| 5.2.3    | Prévalence de la consommation de tabac non fumé.....                                 | 28        |
| 5.2.4    | Prévalence du tabagisme et facteurs socioculturels .....                             | 30        |
| 5.3      | Prévalence de la consommation d'alcool .....                                         | 32        |
| 5.3.1    | Consommation d'alcool au cours des douze derniers mois.....                          | 32        |
| 5.3.2    | Consommation d'alcool au cours des trente derniers jours.....                        | 34        |
| 5.4      | Prévalence de l'inactivité physique.....                                             | 42        |
| 5.4.1    | Prévalence de l'activité physique selon le niveau d'activité .....                   | 42        |
| 5.4.2    | Prévalence de l'inactivité physique selon le type d'activité.....                    | 43        |
| 5.4.3    | Nombre moyen de minutes consacrées chaque jour à une activité physique .....         | 46        |
| 5.4.4    | Nombre moyen de minutes consacrées chaque jour à des comportements sédentaires ..... | 47        |
| 5.5      | Prévalence de la consommation insuffisante de fruits et légumes                      | 50        |
| 5.5.1    | Nombre moyen de portions de fruits ou de légumes consommées par jour .....           | 53        |
| 5.5.2    | Nombre moyen de jours de consommation de fruits ou de légumes                        | 54        |
|          | <b>STEP II .....</b>                                                                 | <b>55</b> |
| 5.6      | Prévalence de la tension artérielle élevée au Bénin en 2008.....                     | 55        |
| 5.7      | Prévalence de la surcharge pondérale et de l'obésité au Bénin en 2008                | 61        |
| 5.7.1    | Prévalence de l'obésité .....                                                        | 61        |
|          | <b>Prévalence de l'obésité en fonction des départements au Bénin en 2008 ....</b>    | <b>63</b> |
| 5.7.2    | Prévalence de la surcharge pondérale.....                                            | 64        |



|                                                                                                          |           |
|----------------------------------------------------------------------------------------------------------|-----------|
| 5.7.3 Répartition des sujets enquêtés en fonction de l'indice de masse corporelle au Bénin en 2008 ..... | 66        |
| <b>STEP III .....</b>                                                                                    | <b>68</b> |
| 5.8 Prévalence de l'hyperglycémie .....                                                                  | 69        |
| <b>Prévalence de l'hyperglycémie au Bénin selon l'ethnie.....</b>                                        | <b>70</b> |
| <b>Prévalence l'hyperglycémie selon le niveau d'instruction .....</b>                                    | <b>71</b> |
| 5.9 Prévalence de l'hypercholestérolémie.....                                                            | 74        |
| <b>Prévalence de l'hypercholestérolémie selon l'ethnie au Bénin en 2008.....</b>                         | <b>75</b> |
| <b>Prévalence selon le niveau d'instruction au Bénin en 2008.....</b>                                    | <b>76</b> |
| <b>Prévalence selon l'activité professionnelle .....</b>                                                 | <b>77</b> |
| • A l'endroit de la population .....                                                                     | 81        |
| <b>6 Références bibliographiques .....</b>                                                               | <b>83</b> |
| <b>Table des matières.....</b>                                                                           | <b>85</b> |
| <b>ANNEXES .....</b>                                                                                     | <b>a</b>  |
| <b>7 Annexes .....</b>                                                                                   | <b>a</b>  |
| Annexe 1 La méthode Kish [8].....                                                                        | a         |
| Annexe 2.....                                                                                            | d         |
| Annexe 3.....                                                                                            | q         |
| Annexe 4.....                                                                                            | w         |



**ANNEXES**

## 7 Annexes

### Annexe 1 La méthode Kish [8]

#### Introduction

La méthode Kish fournit un procédé d'échantillonnage aléatoire pour sélectionner un individu de chaque ménage.

La méthode Kish peut être utilisée pour la sélection des individus à l'intérieur des ménages quelle que soit la méthode d'échantillonnage choisie pour sélectionner ces ménages.

Echantillonnage supplémentaire pour la tranche d'âge 55-64 ans.

En fonction de la structure de la population dans votre site, il peut se révéler difficile de remplir le quota pour la tranche d'âge 55-64 ans. Pour y remédier, il est possible d'élargir l'échantillonnage pour cette tranche d'âge. Si vous décidez d'utiliser cette technique, vous incluez dans l'échantillon tous les membres des ménages sélectionnés qui ont entre 55 et 64 ans.

|                                                  |                           |
|--------------------------------------------------|---------------------------|
| Si le ménage sélectionné                         | Alors vous sélectionnerez |
| A un adulte dans la tranche d'âge 55-64 ans      | 2 participants            |
| N'a pas d'adulte dans la tranche d'âge 55-64 ans | 1 participant             |

**Note :** Si vous décidez d'élargir l'échantillonnage, veuillez le mettre en évidence en ajustant la taille du ménage. S'il y a cinq personnes dans un ménage et que l'une d'elles entre dans la tranche 55-64 ans, la taille du ménage prise en compte pour l'échantillonnage est maintenant de quatre personnes, et l'autre membre considéré a une chance sur quatre d'être sélectionné.

## Feuille de couverture Kish des ménages

|                                                                                          |                          |
|------------------------------------------------------------------------------------------|--------------------------|
| • Synthèse Kish des huit tableaux                                                        | • Liste Kish des ménages |
| Note : Tous ces documents sont disponibles dans la Partie 6 Section 2 du présent Manuel. |                          |
| Suite à la page suivante                                                                 |                          |

|           |                                                                                                                                               |
|-----------|-----------------------------------------------------------------------------------------------------------------------------------------------|
| Procédure | Le tableau ci-dessous établit une liste des étapes-clé pour utiliser la méthode Kish pour l'échantillonnage individuel au niveau des ménages. |
|-----------|-----------------------------------------------------------------------------------------------------------------------------------------------|

| Étape | Description                                                                                                        |
|-------|--------------------------------------------------------------------------------------------------------------------|
| 1     | Enregistrez les informations relatives aux ménages sur la Feuille de couverture Kish des ménages.                  |
| 2     | Utilisez la Liste Kish des ménages pour identifier quel tableau devrait être utilisé pour ce ménage en particulier |
| 3     | Utilisez la Synthèse Kish des huit tableaux pour faire apparaître quel individu devrait être sélectionné.          |

### Feuilles de couvertures Kish des ménages

Les Feuilles de couverture Kish des ménages rassemblent les informations sur les ménages nécessaires à la sélection aléatoire des participants issus de ces

ménages. La feuille de couverture contient des informations sur :

- le nombre d'individus au sein du ménage
- leur âge et
- leur âge

### Liste Kish des ménages

La Liste Kish des ménages permet de choisir quel tableau Kish utiliser pour chaque ménage.

Le numéro du ménage est son code ou son numéro d'ordre au sein de la grappe.

| Ménage | Tableau Kish |
|--------|--------------|
| 1      | A            |
| 2      | A            |
| 3      | B1           |
| 4      | B1           |
| 5      | C            |
| 6      | C            |
| 7      | D            |

| Ménage | Tableau Kish |
|--------|--------------|
| 8      | D            |
| 9      | E1           |
| 10     | E2           |
| 11     | F            |
| 12     | F            |
| 13     | A            |
| Etc.   |              |

| Tableau | Si le nombre d'adultes dans le ménage est de : |   |   |   |   |        |
|---------|------------------------------------------------|---|---|---|---|--------|
|         | 1                                              | 2 | 3 | 4 | 5 | 6 et + |
|         | Sélectionnez l'adulte portant le numéro :      |   |   |   |   |        |
| A       | 1                                              | 1 | 1 | 1 | 1 | 1      |
| B1      | 1                                              | 1 | 1 | 1 | 2 | 2      |
| B2      | 1                                              | 1 | 1 | 2 | 2 | 2      |
| C       | 1                                              | 1 | 2 | 2 | 3 | 3      |
| D       | 1                                              | 2 | 2 | 3 | 4 | 4      |
| E1      | 1                                              | 2 | 3 | 3 | 3 | 5      |
| E2      | 1                                              | 2 | 3 | 4 | 5 | 5      |
| F       | 1                                              | 2 | 3 | 4 | 5 | 6      |

De plus amples détails pour remplir la feuille de couverture sont disponibles dans l'exemple de la partie 6 Section 2

**Note :** Si vous pratiquez l'échantillonnage supplémentaire des 55 – 64, ces derniers ne devraient pas figurer sur la feuille de couverture du ménage car ils ne font pas partie du processus de sélection aléatoire. Leur participation sera alors de 100%.



## Step 1 Informations démographiques

| <b>MODULE DE BASE : Informations démographiques</b> |                                                                                                                               |                                                                                                                                                                                                                                   |                                                             |             |           |      |      |       |  |    |
|-----------------------------------------------------|-------------------------------------------------------------------------------------------------------------------------------|-----------------------------------------------------------------------------------------------------------------------------------------------------------------------------------------------------------------------------------|-------------------------------------------------------------|-------------|-----------|------|------|-------|--|----|
| 14                                                  | Sexe (entourer le numéro correspondant)                                                                                       | Homme<br>Femme                                                                                                                                                                                                                    | 1<br>2                                                      | C1          |           |      |      |       |  |    |
| 15                                                  | Quelle est votre date de naissance ?<br>Ne sait pas 77 777 7777                                                               | <table border="1"> <tr> <td>_ _ _ </td> <td>_ _ </td> <td>_ _ _ _ _ </td> </tr> <tr> <td>Jour</td> <td>Mois</td> <td>Année</td> </tr> </table>                                                                                    | _ _ _                                                       | _ _         | _ _ _ _ _ | Jour | Mois | Année |  | C2 |
| _ _ _                                               | _ _                                                                                                                           | _ _ _ _ _                                                                                                                                                                                                                         |                                                             |             |           |      |      |       |  |    |
| Jour                                                | Mois                                                                                                                          | Année                                                                                                                                                                                                                             |                                                             |             |           |      |      |       |  |    |
|                                                     |                                                                                                                               | Si réponse connue, aller à C4                                                                                                                                                                                                     |                                                             |             |           |      |      |       |  |    |
| 16                                                  | Quel âge avez-vous ?                                                                                                          | Années                                                                                                                                                                                                                            | _ _ _                                                       | C3          |           |      |      |       |  |    |
| 17                                                  | En tout, combien d'années avez-vous passé à l'école ou à suivre une formation à plein temps (sans compter la pré-scolarité) ? | Années                                                                                                                                                                                                                            | _ _ _                                                       | C4          |           |      |      |       |  |    |
| <b>ELARGI : Informations démographiques</b>         |                                                                                                                               | <b>Réponse</b>                                                                                                                                                                                                                    |                                                             | <b>Code</b> |           |      |      |       |  |    |
| 18                                                  | A quel milieu socioculturel appartenez-vous ?                                                                                 | Adja et apparentés<br>Fon et apparentés<br>Bariba et apparentés<br>Dendi et apparentés<br>Yom et apparentés<br>Peulh<br>Otamari<br>Yorouba<br>Africain de l'ouest<br>Autre africain<br>Non africain<br>Refuse                     | 1<br>2<br>3<br>4<br>5<br>6<br>7<br>8<br>9<br>10<br>11<br>88 | C5          |           |      |      |       |  |    |
| 19                                                  | Quel est le <u>plus haut niveau</u> d'instruction que vous ayez atteint ?                                                     | Aucune instruction officielle<br>Moins que l'école primaire<br>Fin de l'école primaire<br>Fin du secondaire niveau 1<br>Fin du secondaire niveau 2<br>École supérieure, Université<br>Diplôme post-universitaire obtenu<br>Refuse | 1<br>2<br>3<br>4<br>5<br>6<br>7<br>88                       | C6          |           |      |      |       |  |    |
| 20                                                  | Laquelle des catégories suivantes décrit le mieux votre activité professionnelle <u>principale</u> ces douze derniers mois ?  | Employé(e) de l'État<br>Employé(e) dans le privé<br>Indépendant(e)<br>Bénévole<br>Étudiant(e)<br>Maître (sse) de maison<br>Retraité(e)                                                                                            | 1<br>2<br>3<br>4<br>5<br>6<br>7                             | C7          |           |      |      |       |  |    |

|    |                                                                                                                                                                                     |                     |           |                   |     |
|----|-------------------------------------------------------------------------------------------------------------------------------------------------------------------------------------|---------------------|-----------|-------------------|-----|
|    |                                                                                                                                                                                     | Chômeur (se)        | 8         |                   |     |
|    |                                                                                                                                                                                     | Invalide            | 9         |                   |     |
|    |                                                                                                                                                                                     | Refuse              | 88        |                   |     |
| 21 | Combien de personnes âgées de <u>plus de dix-huit ans</u> , y compris vous-même, habitent dans votre maison ?                                                                       | Nombre de personnes | _ _       | C8                |     |
| 22 | En prenant comme <u>référence l'année passée</u> , pouvez-vous me dire quels ont été les revenus moyens du ménage ?<br>( <i>NOTER SEULEMENT POUR UNE PERIODE ET PAS LES TROIS</i> ) | Par semaine         | _ _   _ _ | <i>Aller à T1</i> | C9a |
|    |                                                                                                                                                                                     | Ou par mois         | _ _   _ _ | <i>Aller à T1</i> | C9b |
|    |                                                                                                                                                                                     | Ou par année        | _ _   _ _ | <i>Aller à T1</i> | C9c |
|    |                                                                                                                                                                                     | Refuse              | 8         |                   | C9d |
| 23 | Si vous ne connaissez pas le montant, pouvez-vous me donner une estimation du revenu annuel du ménage si je vous lis quelques montants ? Est-ce...                                  | ≤ 66 000F           | 1         | C10               |     |
|    |                                                                                                                                                                                     | [67 000 - 132 000]  | 2         |                   |     |
|    |                                                                                                                                                                                     | [133 000 - 198 000] | 3         |                   |     |
|    |                                                                                                                                                                                     | [199 000 - 264 000] | 4         |                   |     |
|    |                                                                                                                                                                                     | > 264 000           | 5         |                   |     |
|    |                                                                                                                                                                                     | Ne sait pas         | 7         |                   |     |
|    |                                                                                                                                                                                     | Refuse              | 8         |                   |     |



## Step 1 Mesures comportementales

| MODULE DE BASE : Consommation de tabac |                                                                                                                                                                                                              |                          |               |                                       |         |
|----------------------------------------|--------------------------------------------------------------------------------------------------------------------------------------------------------------------------------------------------------------|--------------------------|---------------|---------------------------------------|---------|
| Question                               |                                                                                                                                                                                                              | Réponse                  |               |                                       | Code    |
| 24                                     | Fumez-vous actuellement des produits à base de tabac tels que cigarettes, cigares ou pipes ?                                                                                                                 | Oui                      | 1             |                                       | T1      |
|                                        |                                                                                                                                                                                                              | Non                      | 2             | <i>Si Non, aller à T6</i>             |         |
| 25                                     | <u>Si Oui</u> , Fumez-vous quotidiennement ?                                                                                                                                                                 | Oui                      | 1             |                                       | T2      |
|                                        |                                                                                                                                                                                                              | Non                      | 2             | <i>Si Non, aller à T6</i>             |         |
| 26                                     | A quel âge avez-vous commencé à fumer quotidiennement ?                                                                                                                                                      | Age (années)             | _ _ _         | <i>Si réponse connue aller à T5a</i>  | T3      |
|                                        |                                                                                                                                                                                                              | Ne se souvient pas       |               | 777                                   |         |
| 27                                     | Si vous ne vous rappelez pas de votre âge, vous souvenez-vous depuis quand vous avez commencé à fumer quotidiennement ?<br>(NOTER SEULEMENT POUR UNE PERIODE ET PAS LES TROIS)<br><br>Ne se souvient pas 777 | En nombre d'années       | _ _ _         | <i>Si réponse connue, aller à T5a</i> | T4a     |
|                                        |                                                                                                                                                                                                              | Ou en Mois               | _ _ _         | <i>Si réponse connue, aller à T5a</i> | T4b     |
|                                        |                                                                                                                                                                                                              | Ou en Semaines           | _ _ _         |                                       | T4c     |
| 28                                     | Quelle quantité des produits suivants fumez-vous en moyenne chaque jour ?<br><br>(INSCRIRE LA QUANTITE POUR CHAQUE TYPE DE PRODUIT)<br><br>Ne se souvient pas 777                                            | Cigarettes industrielles |               | _ _ _                                 | T5a     |
|                                        |                                                                                                                                                                                                              | Cigarettes roulées       |               | _ _ _                                 | T5b     |
|                                        |                                                                                                                                                                                                              | Pipes                    |               | _ _ _                                 | T5c     |
|                                        |                                                                                                                                                                                                              | Cigares, cigarillos      |               | _ _ _                                 | T5d     |
|                                        |                                                                                                                                                                                                              | Autres                   | _ _ _         | <i>Si Autres, aller à T5 other</i>    | T5e     |
|                                        |                                                                                                                                                                                                              | Autres (à spécifier)     | _ _ _ _ _ _ _ |                                       | T5other |

| <b>ELARGI : Consommation de tabac</b>        |                                                                                                                                                                                                               |                              |                 |                                      |             |
|----------------------------------------------|---------------------------------------------------------------------------------------------------------------------------------------------------------------------------------------------------------------|------------------------------|-----------------|--------------------------------------|-------------|
| <b>Question</b>                              |                                                                                                                                                                                                               | <b>Réponse</b>               |                 |                                      | <b>Code</b> |
| 29                                           | Dans le passé, avez-vous déjà fumé quotidiennement ?                                                                                                                                                          | Oui                          | 1               | <i>Si Non, aller à T6</i>            | T6          |
|                                              |                                                                                                                                                                                                               | Non                          | 2               |                                      |             |
| 30                                           | <u>Si Oui</u> , Quel âge aviez-vous quand vous avez arrêté de fumer quotidiennement ?                                                                                                                         | Age (années)                 | _ _   _         | <i>Si réponse connue aller à T9</i>  | T7          |
|                                              |                                                                                                                                                                                                               | Ne se souvient pas           |                 | 777                                  |             |
| 31                                           | Si vous ne vous rappelez pas de votre âge, souvenez-vous depuis quand vous avez arrêté de fumer quotidiennement ?<br><i>(NOTER SEULEMENT POUR UNE PERIODE ET PAS LES TROIS)</i><br><br>Ne se souvient pas 777 | En nombre d'années           | _ _   _         | <i>Si réponse connue, aller à T9</i> | T8a         |
|                                              |                                                                                                                                                                                                               | Ou Nombre de Mois            | _ _   _         | <i>Si réponse connue, aller à T9</i> | T8b         |
|                                              |                                                                                                                                                                                                               | Ou Nombre de Semaines        | _ _   _         |                                      | T8c         |
| 32                                           | Consommez-vous actuellement du tabac non fumé sous forme de tabac à priser, de tabac à mâcher, de feuilles de bétel ?                                                                                         | Oui                          | 1               | <i>Si Non, aller à T12</i>           | T9          |
|                                              |                                                                                                                                                                                                               | Non                          | 2               |                                      |             |
| 33                                           | <u>Si Oui</u> , En consommez-vous quotidiennement ?                                                                                                                                                           | Oui                          | 1               | <i>Si Non, aller à T12</i>           | T10         |
|                                              |                                                                                                                                                                                                               | Non                          | 2               |                                      |             |
| <b>ELARGI : Consommation de tabac, suite</b> |                                                                                                                                                                                                               |                              |                 |                                      |             |
| 34                                           | En moyenne, combien de fois par jour consommez-vous les produits suivants ?<br><br><i>(INSCRIRE POUR CHAQUE TYPE)</i><br><br>Ne sait pas 777                                                                  | Tabac à priser (voie orale)  | _ _   _         |                                      | T11a        |
|                                              |                                                                                                                                                                                                               | Tabac à chiquer (voie orale) | _ _   _         |                                      | T11b        |
|                                              |                                                                                                                                                                                                               | Tabac à mâcher               | _ _   _         |                                      | T11c        |
|                                              |                                                                                                                                                                                                               | Feuilles de bétel            | _ _   _         |                                      | T11d        |
|                                              |                                                                                                                                                                                                               | Autres                       | _ _   _         | <i>Si Autres, Aller à T11 other</i>  | T11e        |
|                                              |                                                                                                                                                                                                               | Autres (Spécifier)           | _ _   _ _ _ _ _ |                                      | T11other    |
| 35                                           | Dans le passé, avez-vous déjà consommé quotidiennement du tabac non fumé tel que [tabac à priser, tabac à mâcher, feuilles de bétel] ?                                                                        | Oui                          | 1               |                                      | T12         |

|  |     |   |
|--|-----|---|
|  | Non | 2 |
|--|-----|---|

**MODULE DE BASE : Consommation d'alcool**

| Question |                                                                                                                                                                                                                         | Réponse                 |                                | Code |
|----------|-------------------------------------------------------------------------------------------------------------------------------------------------------------------------------------------------------------------------|-------------------------|--------------------------------|------|
| 36       | Avez-vous consommé une boisson alcoolisée comme de la bière, du vin, de la liqueur, du cidre ou des boissons alcoolisées locales ces <u>douze derniers mois</u> ?<br><i>UTILISER LES CARTES OU MONTRER DES EXEMPLES</i> | Oui                     |                                | A1   |
|          |                                                                                                                                                                                                                         | Non                     | 2<br><i>Si Non, aller à D1</i> |      |
| 37       | Durant les douze derniers mois, à quelle fréquence avez-vous bu au moins une boisson alcoolisée ?                                                                                                                       | Quotidiennement         | 1                              | A2   |
|          |                                                                                                                                                                                                                         | 5-6 jours par semaine   | 2                              |      |
|          |                                                                                                                                                                                                                         | 1-4 jours par semaine   | 3                              |      |
|          |                                                                                                                                                                                                                         | 1-3 jours par mois      | 4                              |      |
|          |                                                                                                                                                                                                                         | Moins d'1 fois par mois | 5                              |      |
| 38       | Quand vous buvez de l'alcool, combien de verres prenez-vous en moyenne par jour ?                                                                                                                                       | Nombre                  | _ _                            | A3   |
|          |                                                                                                                                                                                                                         | Ne sait pas             | 77                             |      |
| 39       | Avez-vous consommé une boisson alcoolisée comme de la bière, du vin, de la liqueur, du cidre, <u>ces trente derniers jours</u> ?                                                                                        | Oui                     | 1                              | A4   |
|          |                                                                                                                                                                                                                         | Non                     | 2<br><i>Si Non, aller à A6</i> |      |
| 40       | Au cours des 7 derniers jours, combien de verres standards d'alcool avez-vous pris (quelle que soit la boisson alcoolisée) ?                                                                                            | Lundi                   | _ _                            | A5a  |
|          |                                                                                                                                                                                                                         | Mardi                   | _ _                            | A5b  |
|          |                                                                                                                                                                                                                         | Mercredi                | _ _                            | A5c  |
|          |                                                                                                                                                                                                                         | Jeudi                   | _ _                            | A5d  |
|          |                                                                                                                                                                                                                         | Vendredi                | _ _                            | A5e  |
|          |                                                                                                                                                                                                                         | Samedi                  | _ _                            | A5f  |
|          |                                                                                                                                                                                                                         | Dimanche                | _ _                            | A5g  |

**ELARGI : Consommation d'alcool**

| Question |                                                                                                                                                     | Réponse                        |         | Code |
|----------|-----------------------------------------------------------------------------------------------------------------------------------------------------|--------------------------------|---------|------|
| 41       | Au cours des 12 derniers mois, quel a été le plus grand nombre de verres que vous ayez bu en une seule fois, en comptant tous les verres standard ? | Le plus grand nombre de verres | _ _     | A6   |
| 42       | <u>Pour les hommes uniquement</u> :<br>Combien de jours avez-vous bu cinq verres standard ou plus en un seul jour                                   | Nombre de jours                | _ _   _ | A7   |

|    |                                                                                                                                                 |                 |         |    |
|----|-------------------------------------------------------------------------------------------------------------------------------------------------|-----------------|---------|----|
|    | au cours des 12 derniers mois ?                                                                                                                 |                 |         |    |
| 43 | <u>Pour les femmes seulement</u> : Combien de jours avez-vous bu quatre verres standard ou plus en un seul jour au cours des 12 derniers mois ? | Nombre de jours | _ _   _ | A8 |

| <b>MODULE DE BASE : Hygiène alimentaire</b> |                                                                                                                             |                         |     |                                       |    |
|---------------------------------------------|-----------------------------------------------------------------------------------------------------------------------------|-------------------------|-----|---------------------------------------|----|
| 44                                          | Habituellement, combien de jours par semaine consommez-vous des fruits ?                                                    | Nombre de jours         | _ _ | Si aucun jour, aller à D3             | D1 |
|                                             |                                                                                                                             | Ne sait pas 77          |     |                                       |    |
| 45                                          | Combien de portions de fruits mangez-vous lors d'une de ces journées ?                                                      | Nombre de portions      | _ _ |                                       | D2 |
|                                             |                                                                                                                             | Ne sait pas 77          |     |                                       |    |
| 46                                          | Habituellement, combien de jours par semaine consommez-vous des légumes ?                                                   | Nombre de jours         | _ _ | Si aucun jour, aller à D5             | D3 |
|                                             |                                                                                                                             | Ne sait pas 77          |     |                                       |    |
| 47                                          | Combien de portions de légumes mangez-vous lors d'une de ces journées ?                                                     | Nombre de portions      | _ _ |                                       | D4 |
|                                             |                                                                                                                             | Ne sait pas 77          |     |                                       |    |
| <b>ELARGI : Hygiène alimentaire</b>         |                                                                                                                             |                         |     |                                       |    |
| 48                                          | Quelle sorte de matière grasse (huile, beurre...) utilisez-vous le plus souvent pour la préparation des repas à la maison ? | Huile végétale          | 1   | Si Autres, aller à D5<br><i>other</i> | D5 |
|                                             |                                                                                                                             | Lard ou graisse         | 2   |                                       |    |
|                                             |                                                                                                                             | Beurre ou beurre allégé | 3   |                                       |    |
|                                             |                                                                                                                             | Margarine               | 4   |                                       |    |
|                                             |                                                                                                                             | Autres 5                |     |                                       |    |
|                                             |                                                                                                                             | Aucune en particulier   | 6   |                                       |    |
|                                             |                                                                                                                             | Aucune utilisée         | 7   |                                       |    |
| Ne sait pas                                 | 77                                                                                                                          |                         |     |                                       |    |
|                                             | Autres                                                                                                                      | _ _   _                 |     | D5<br><i>other</i>                    |    |

| <b>MODULE DE BASE : Activité physique</b> |                                                                                                                                                                                                                                                                                                                  |                    |               |                            |             |
|-------------------------------------------|------------------------------------------------------------------------------------------------------------------------------------------------------------------------------------------------------------------------------------------------------------------------------------------------------------------|--------------------|---------------|----------------------------|-------------|
| <b>Question</b>                           |                                                                                                                                                                                                                                                                                                                  | <b>Réponses</b>    |               |                            | <b>Code</b> |
| <b>Activités au travail</b>               |                                                                                                                                                                                                                                                                                                                  |                    |               |                            |             |
| 49                                        | Est-ce que votre travail implique des activités physiques de forte intensité qui nécessitent une augmentation conséquente de la respiration ou du rythme cardiaque, comme [soulever des charges lourdes, travailler sur un chantier, effectuer du travail de maçonnerie] pendant au moins 10 minutes d'affilée ? | Oui                | 1             |                            | P1          |
|                                           |                                                                                                                                                                                                                                                                                                                  | Non                | 2             | <i>Si Non, aller à P4</i>  |             |
| 50                                        | Habituellement, combien de jours par semaine effectuez-vous des activités physiques de forte intensité dans le cadre de votre travail ?                                                                                                                                                                          | Nombre de jours    |               | _                          | P2          |
| 51                                        | Lors d'une journée habituelle durant laquelle vous effectuez des activités physiques de forte intensité, combien de temps consacrez-vous à ces activités ?                                                                                                                                                       | Heure :<br>Minutes | _ _ <br>Heure | _ _ <br>Minutes            | P3<br>(a-b) |
| 52                                        | Est-ce que votre travail implique des activités physiques d'intensité modérée, comme une marche rapide ou [soulever une charge légère] durant au moins 10 minutes d'affilée ?                                                                                                                                    | Oui                | 1             |                            | P4          |
|                                           |                                                                                                                                                                                                                                                                                                                  | Non                | 2             | <i>Si Non, aller à P7</i>  |             |
| 53                                        | Habituellement, combien de jours par semaine effectuez-vous des activités physiques d'intensité modérée dans le cadre de votre travail ?                                                                                                                                                                         | Nombre de jours    |               | _                          | P5          |
| 54                                        | Lors d'une journée habituelle durant laquelle vous effectuez des activités physiques d'intensité modérée, combien de temps consacrez-vous à ces activités ?                                                                                                                                                      | Heure :<br>Minutes | _ _ <br>Heure | _ _ <br>Minutes            | P6<br>(a-b) |
| <b>Se déplacer d'un endroit à l'autre</b> |                                                                                                                                                                                                                                                                                                                  |                    |               |                            |             |
| 55                                        | Est-ce que vous effectuez des trajets d'au moins 10 minutes à pied ou à vélo ?                                                                                                                                                                                                                                   | Oui                | 1             |                            | P7          |
|                                           |                                                                                                                                                                                                                                                                                                                  | Non                | 2             | <i>Si Non, aller à P10</i> |             |
| 56                                        | Habituellement, combien de jours par semaine effectuez-vous des trajets d'au moins 10 minutes à pied ou à vélo ?                                                                                                                                                                                                 | Nombre de jours    |               | _                          | P8          |
| 57                                        | Lors d'une journée habituelle, combien de temps consacrez-vous à vos déplacements à pied ou à vélo ?                                                                                                                                                                                                             | Heure :<br>Minutes | _ _ <br>Heure | _ _ <br>Minutes            | P9<br>(a-b) |

| <b>Activités de loisirs</b>    |                                                                                                                                                                                                                                                                                           |                    |               |                             |              |
|--------------------------------|-------------------------------------------------------------------------------------------------------------------------------------------------------------------------------------------------------------------------------------------------------------------------------------------|--------------------|---------------|-----------------------------|--------------|
| 58                             | Est-ce que vous pratiquez des sports, du fitness ou des activités de loisirs de forte intensité qui nécessitent une augmentation importante de la respiration ou du rythme cardiaque comme [courir ou jouer au football] pendant au moins dix minutes d'affilée ?                         | Oui                | 1             |                             |              |
|                                |                                                                                                                                                                                                                                                                                           | Non                | 2             | <i>Si Non, aller à P 13</i> | P10          |
| 59                             | Habituellement, combien de jours par semaine pratiquez-vous une activité sportive, du fitness ou d'autres activités de loisirs de forte intensité ?                                                                                                                                       | Nombre de jours    |               | _ _                         | P11          |
| 60                             | Lors d'une journée habituelle, combien de temps y consacrez-vous ?                                                                                                                                                                                                                        | Heure :<br>Minutes | _ _ <br>Heure | _ _ <br>Minutes             | P12<br>(a-b) |
| 61                             | Est-ce que vous pratiquez des sports, du fitness ou des activités de loisirs d'intensité modérée qui nécessitent une petite augmentation de la respiration ou du rythme cardiaque comme la marche rapide [faire du vélo, nager, jouer au volley] pendant au moins dix minutes d'affilée ? | Oui                | 1             |                             |              |
|                                |                                                                                                                                                                                                                                                                                           | Non                | 2             | <i>Si Non, aller à P 16</i> | P13          |
| 62                             | Habituellement, combien de jours par semaine pratiquez-vous une activité sportive, du fitness ou d'autres activités de loisirs d'intensité modérée ?                                                                                                                                      | Nombre de jours    |               | _ _                         | P14          |
| 63                             | Lors d'une journée habituelle, combien de temps y consacrez-vous ?                                                                                                                                                                                                                        | Heure :<br>Minutes | _ _ <br>Heure | _ _ <br>Minutes             | P15<br>(a-b) |
| <b>Comportement sédentaire</b> |                                                                                                                                                                                                                                                                                           |                    |               |                             |              |
| 64                             | Combien de temps passez-vous en position assise ou couchée lors d'une journée habituelle ?                                                                                                                                                                                                | Heure :<br>Minutes | _ _ <br>Heure | _ _ <br>Minutes             | P16<br>(a-b) |

| <b>ELARGI : Antécédents de tension artérielle élevée</b> |                                                                                                                                                                   |                               |   |             |
|----------------------------------------------------------|-------------------------------------------------------------------------------------------------------------------------------------------------------------------|-------------------------------|---|-------------|
| <b>Questions</b>                                         |                                                                                                                                                                   | <b>Réponses</b>               |   | <b>Code</b> |
| 65                                                       | Quand est-ce que votre tension artérielle a été prise pour la dernière fois par un professionnel de santé ?                                                       | Au cours des 12 derniers mois | 1 | H1          |
|                                                          |                                                                                                                                                                   | Entre 1-5 années              | 2 |             |
|                                                          |                                                                                                                                                                   | Pas ces 5 dernières années    | 3 |             |
| 66                                                       | Au cours des 12 derniers mois, est-ce qu'un professionnel de santé vous a dit que vous aviez une tension artérielle élevée ou que vous souffriez d'hypertension ? | Oui                           | 1 | H2          |
|                                                          |                                                                                                                                                                   | Non                           | 2 |             |
| 67                                                       | Recevez-vous actuellement les traitements suivants prescrits par un professionnel de santé pour une tension artérielle élevée, et/ou les conseils suivants ?      |                               |   |             |
|                                                          | Médicaments pris ces deux dernières semaines                                                                                                                      | Oui                           | 1 | H3a         |
|                                                          |                                                                                                                                                                   | Non                           | 2 |             |
|                                                          | Régime spécial prescrit                                                                                                                                           | Oui                           | 1 | H3b         |
|                                                          |                                                                                                                                                                   | Non                           | 2 |             |
|                                                          | Conseil ou traitement pour perdre du poids                                                                                                                        | Oui                           | 1 | H3c         |
|                                                          |                                                                                                                                                                   | Non                           | 2 |             |
|                                                          | Conseil ou traitement pour arrêter de fumer                                                                                                                       | Oui                           | 1 | H3d         |
|                                                          |                                                                                                                                                                   | Non                           | 2 |             |
|                                                          | Conseil pour commencer une activité physique ou en augmenter la fréquence                                                                                         | Oui                           | 1 | H3e         |
| Non                                                      |                                                                                                                                                                   | 2                             |   |             |
| 68                                                       | Au cours des 12 derniers mois avez-vous vu un guérisseur traditionnel pour une tension artérielle élevée ou pour de l'hypertension ?                              | Oui                           | 1 | H4          |
|                                                          |                                                                                                                                                                   | Non                           | 2 |             |
| 69                                                       | Prenez-vous actuellement un remède traditionnel ou à base d'herbes pour votre tension artérielle élevée ?                                                         | Oui                           | 1 | H5          |
|                                                          |                                                                                                                                                                   | Non                           | 2 |             |

| <b>ELARGI : Antécédents de diabète</b> |                                                                                                                                           |          |   |      |
|----------------------------------------|-------------------------------------------------------------------------------------------------------------------------------------------|----------|---|------|
| Questions                              |                                                                                                                                           | Réponses |   | Code |
| 70                                     | A-t-on mesuré votre glycémie ces 12 derniers mois ?                                                                                       | Oui      | 1 | H6   |
|                                        |                                                                                                                                           | Non      | 2 |      |
| 71                                     | Est-ce qu'un professionnel de santé vous a déjà dit que vous aviez du diabète au cours de ces 12 derniers mois ?                          | Oui      | 1 | H7   |
|                                        |                                                                                                                                           | Non      | 2 |      |
| 72                                     | Recevez-vous actuellement les traitements suivants prescrits par un professionnel de santé pour le diabète, et/ou les conseils suivants ? |          |   |      |
|                                        | Insuline                                                                                                                                  | Oui      | 1 | H8a  |
|                                        |                                                                                                                                           | Non      | 2 |      |
|                                        | Médicaments par voie orale que vous avez pris ces 2 dernières semaines                                                                    | Oui      | 1 | H8b  |
|                                        |                                                                                                                                           | Non      | 2 |      |
|                                        | Régime spécial prescrit                                                                                                                   | Oui      | 1 | H8c  |
|                                        |                                                                                                                                           | Non      | 2 |      |
|                                        | Conseil ou traitement pour perdre du poids                                                                                                | Oui      | 1 | H8d  |
|                                        |                                                                                                                                           | Non      | 2 |      |
|                                        | Conseil ou traitement pour arrêter de fumer                                                                                               | Oui      | 1 | H8e  |
|                                        |                                                                                                                                           | Non      | 2 |      |
|                                        | Conseil pour commencer une activité physique ou en augmenter la fréquence                                                                 | Oui      | 1 | H8f  |
| Non                                    |                                                                                                                                           | 2        |   |      |
| 73                                     | Au cours des 12 derniers mois avez-vous vu un guérisseur traditionnel pour le diabète ?                                                   | Oui      | 1 | H9   |
|                                        |                                                                                                                                           | Non      | 2 |      |
| 74                                     | Prenez-vous actuellement un remède traditionnel ou à base d'herbes pour votre diabète ?                                                   | Oui      | 1 | H10  |
|                                        |                                                                                                                                           | Non      | 2 |      |



## Step 2 Mesures physiques

| <b>MODULE DE BASE : Taille et poids</b>             |                                                                                                                                                   |                         |             |                    |
|-----------------------------------------------------|---------------------------------------------------------------------------------------------------------------------------------------------------|-------------------------|-------------|--------------------|
| Questions                                           |                                                                                                                                                   | Réponses                |             | Code               |
| 75                                                  | Code ID de l'enquêteur                                                                                                                            | _ _ _ _                 |             | M1                 |
| 76                                                  | Code de la toise et du pèse-personne                                                                                                              | Taille                  | _ _         | M2a                |
|                                                     |                                                                                                                                                   | Poids                   | _ _         | M2b                |
| 77                                                  | Taille                                                                                                                                            | en Centimètres (cm)     | _ _ _ _     | M3                 |
| 78                                                  | Poids<br><i>Si trop lourd pour le pèse-personne, codez 666.6</i>                                                                                  | en Kilogrammes (kg)     | _ _ _ _     | M4                 |
| 79                                                  | <i>(Pour les femmes) Êtes-vous enceinte ?</i>                                                                                                     | Oui                     | 1           | Si Oui, aller à M8 |
|                                                     |                                                                                                                                                   | Non                     | 2           |                    |
| <b>BASE : Tour de Taille</b>                        |                                                                                                                                                   |                         |             |                    |
| 80                                                  | Code ID pour la taille                                                                                                                            | _ _                     |             | M6                 |
| 81                                                  | Tour de taille                                                                                                                                    | en Centimètres (cm)     | _ _ _ _     | M7                 |
| <b>BASE : Tension artérielle</b>                    |                                                                                                                                                   |                         |             |                    |
| 82                                                  | Code ID de l'enquêteur                                                                                                                            | _ _                     |             | M8                 |
| 83                                                  | Code ID pour la tension artérielle                                                                                                                | _ _                     |             | M9                 |
| 84                                                  | Largeur du brassard                                                                                                                               | Petit<br>Moyen<br>Large | 1<br>2<br>3 | M10                |
| 85                                                  | Mesure 1                                                                                                                                          | Systolique (mmHg)       | _ _ _       | M11a               |
|                                                     |                                                                                                                                                   | Diastolique (mmHg)      | _ _ _       | M11b               |
| 86                                                  | Mesure 2                                                                                                                                          | Systolique (mmHg)       | _ _ _       | M12a               |
|                                                     |                                                                                                                                                   | Diastolique (mmHg)      | _ _ _       | M12b               |
| 87                                                  | Mesure 3                                                                                                                                          | Systolique (mmHg)       | _ _ _       | M13a               |
|                                                     |                                                                                                                                                   | Diastolique (mmHg)      | _ _ _       | M13b               |
| 88                                                  | Au cours des deux dernières semaines, avez-vous suivi un traitement, prescrit par un professionnel de santé, pour une tension artérielle élevée ? | Oui                     | 1           | M14                |
|                                                     |                                                                                                                                                   | Non                     | 2           |                    |
| <b>ELARGI : Tour de hanches et Rythme cardiaque</b> |                                                                                                                                                   |                         |             |                    |
| 89                                                  | Tour de hanches                                                                                                                                   | en Centimètres (cm)     | _ _ _ _     | M15                |
| 90                                                  | Rythme cardiaque (Indiquez si un appareil automatique de tension artérielle est utilisé)                                                          |                         |             |                    |
|                                                     | Mesure 1                                                                                                                                          | Battements par minute   | _ _ _       | M16a               |

|  |          |                       |       |      |
|--|----------|-----------------------|-------|------|
|  | Mesure 2 | Battements par minute | _ _ _ | M16b |
|  | Mesure 3 | Battements par minute | _ _ _ | M16c |

### Step 3 Mesures biochimiques

| <b>BASE : Glycémie</b>                           |                                                                                             |                    |               |                 |             |
|--------------------------------------------------|---------------------------------------------------------------------------------------------|--------------------|---------------|-----------------|-------------|
| <b>Questions</b>                                 |                                                                                             | <b>Réponses</b>    |               |                 | <b>Code</b> |
| 91                                               | Au cours des 12 dernières heures, avez-vous bu ou mangé quelque chose, autre que de l'eau ? | Oui                | 1             |                 | B1          |
|                                                  |                                                                                             | Non                | 2             |                 |             |
| 92                                               | Code ID du technicien                                                                       | _ _ _              |               |                 | B2          |
| 93                                               | Code ID de l'appareil                                                                       | _ _ _              |               |                 | B3          |
| 94                                               | Heure de la prise de sang (0-24 heures)                                                     | Heure :<br>Minutes | _ _ <br>Heure | _ _ <br>Minutes | B4          |
| 95                                               | Glycémie à jeun                                                                             | mmol/l             | _ _           | _ _             | B5          |
| <b>BASE : Lipides sanguins</b>                   |                                                                                             |                    |               |                 |             |
| 96                                               | Code ID de l'appareil                                                                       | _ _ _              |               |                 | B6          |
| 97                                               | Cholestérol total                                                                           | mmol/l             | _ _           | _ _             | B7          |
| <b>ELARGI : Triglycérides et Cholestérol HDL</b> |                                                                                             |                    |               |                 |             |
| 98                                               | Triglycérides                                                                               | mmol/l             | _ _           | _ _             | B8          |
| 99                                               | Cholestérol HDL                                                                             | mmol/l             | _ _           | _ _             | B9          |

### Annexe 3

#### Evaluation de la consommation d'alcool

La consommation d'alcool a porté sur la fréquence de consommation et la quantité consommée.

La quantification de la consommation d'alcool s'est faite en nombre de verres standards. Les verres standards diffèrent d'une boisson à une autre en fonction de leur titre alcoolique. Le titre alcoolique des bières varient entre 4,5° et 7,5° (Annexe VII). Nous avons considéré dans cette étude 5° pour toutes les bières. Les boissons alcoolisées locales telles que le TCHOUKOUTOU (shukutu), le ATAN et le SODABI titrent respectivement 8°,5° et 45° [54]. Nous avons considéré dans cette étude un titre alcoolique de 5° pour le TCHOUKOUTOU.

Les volumes des verres standards des boissons figurent à l'annexe V. [55]. Les volumes des verres standards des boissons variant en fonction de leur degré alcoolique, les enquêteurs étaient munis d'une table de conversion (Voir Annexe V). Le nombre de verre standard d'alcool consommé par un sujet a été obtenu en divisant le volume de la boisson consommée par le volume de son verre standard.

Pour les bières, le volume consommé a été obtenu en multipliant le nombre de bouteille consommé (½ bouteille, 1 bouteille, 2 bouteilles, etc.) par le volume de la bouteille (Annexe VII). Le nombre de verres standards a été obtenu en divisant le volume ainsi calculé (en ml) par 250.

Pour le SODABI, le volume consommé a été déterminé à partir du volume du TALOKPEMI. Les TALOKPEMI ont une capacité de 40 à 45ml. Nous avons considéré la moyenne de 42,5ml.

$$1 \text{ TALOPKPEMI de SODABI} = 42, \frac{5}{25} = 1,7 \text{ verre standard}$$

Le nombre de verres standards consommé est obtenu en multipliant le nombre de TALOKPEMI consommé par 1,7.

Pour les boissons autres que les bières ou celles qui ne sont pas consommées par le TALOKPEMI (TCHOUKOUTOU, ATAN etc.), le volume consommé par le sujet a été déterminé à partir du bol gradué. Il a été demandé pour ce faire au sujet d'estimer le volume consommé à partir du gradué (1 bol gradué, 2 bols gradués, etc.).

Lorsque le sujet a un bol ou un verre fixe qu'il utilise habituellement, le volume de ce bol ou verre est déterminé sur place par l'enquêteur à l'aide du bol gradué. Le nombre de verres standards est obtenu en divisant le volume consommé ainsi calculé (en ml) par 25 pour les boissons titrant 45° et par 30 pour celles titrant 40°.

## Annexe 4

### GRAPPES SELECTIONNEES/STRATIFICATION

| N°      | DEPARTEMENTS | ARRONDISSEMENTS | GRAPPES | POP. ARR | QUARTIERS/ VILLAGES | POP. VILLAGE | NOMBRE PERS |
|---------|--------------|-----------------|---------|----------|---------------------|--------------|-------------|
| 1       | PLATEAU      | IKPINLE         | 1       | 16 372   | ATAN-EWE            | 1 288        | 12          |
|         |              |                 |         |          | IGBO-IROKO          | 641          | 7           |
|         |              |                 |         |          | IKPINLE             | 7 348        | 68          |
|         |              |                 |         |          | ITABOLARINWA        | 3325         | 30          |
|         |              | LAGBE           | 2       | 9 138    | HOUMBODJEDJE        | 1285         | 35          |
|         |              |                 |         |          | KOUYE               | 664          | 18          |
|         |              |                 |         |          | LAGBE               | 863          | 23          |
|         |              |                 |         |          | SOKOU               | 1 472        | 40          |
|         |              | KETOUE          | 3       | 25102    | ATCHOUBI            | 4642         | 38          |
|         |              |                 |         |          | IDJABO              | 1299         | 11          |
|         |              |                 |         |          | MASSAFE             | 6957         | 58          |
|         |              |                 |         |          | ODIARO              | 705          | 6           |
|         |              |                 |         |          | OGUIDIGBO           | 185          | 2           |
|         |              | AGUIDI          | 4       | 12 739   | AGADA-HOUNME        | 1015         | 22          |
|         |              |                 |         |          | ASSAIDIOTCHE        | 1967         | 24          |
|         |              |                 |         |          | ILAKOIDIORO         | 1102         | 25          |
|         |              |                 |         |          | KOBEDJO             | 955          | 22          |
| MODOGAN | 994          |                 |         |          | 22                  |              |             |
| 2       | ATLANTIQUE   | GODOMEY         | 5 / 6   | 153 447  | COCOCODJI           | 14856        | 31          |
|         |              |                 |         |          | GODOMEY-N'GBEHO     | 1223         | 3           |
|         |              |                 |         |          | SALAMEY             | 23219        | 50          |
|         |              |                 |         |          | GODOMEY TOGOUDO     | 21468        | 93          |

| N° | DEPARTEMENTS | ARRONDISSEMENTS | GRAPPES    | POP. ARR | QUARTIERS/ VILLAGES | POP. VILLAGE | NOMBRE PERS |
|----|--------------|-----------------|------------|----------|---------------------|--------------|-------------|
|    |              |                 |            |          | YLOMAHOUTO          | 24396        | 53          |
|    |              | ABOMEY- CALAVI  | 7          | 61450    | AGORI               | 28534        | 73          |
|    |              |                 |            |          | KANSOUKPA           | 2412         | 7           |
|    |              |                 |            |          | SEME                | 13695        | 35          |
|    |              | SEKOU           | 8          | 16 124   | HOUINDJANAWA        | 1431         | 16          |
|    |              |                 |            |          | DODJI ALIHO         | 2390         | 28          |
|    |              |                 |            |          | HOUNDADJA           | 758          | 8           |
|    |              |                 |            |          | SEKOU CENTRE        | 4392         | 50          |
|    |              |                 |            |          | SOHON               | 561          | 7           |
|    |              |                 |            |          | VEHOUI              | 432          | 5           |
|    |              | GAKPE           | 9          | 4776     | AMOULEHOUE          | 680          | 40          |
|    |              |                 |            |          | FONKOUNME           | 1286         | 75          |
|    |              | HOUEDO-AGUEKON  | 10         | 10610    | GANVIECOMEY         | 1704         | 34          |
|    |              |                 |            |          | GBEGODO             | 2322         | 47          |
|    |              |                 |            |          | GBESSOU             | 1611         | 33          |
|    |              | SEHOUE          | 11         | 12081    | ACLONME             | 2512         | 52          |
|    |              |                 |            |          | AKLISSA             | 1026         | 22          |
|    |              |                 |            |          | SOME                | 1969         | 41          |
|    |              | TANGBODJEVIE    | 12         | 9604     | ANAVIE              | 537          | 12          |
|    |              |                 |            |          | GLEGBODJI II        | 1086         | 25          |
|    |              |                 |            |          | HOUZE               | 861          | 19          |
|    |              |                 | TANGBO AGA | 1842     | 42                  |              |             |
|    |              |                 | YEVI       | 680      | 15                  |              |             |
| 3  | ALIBORI      | OUNET           | 13         | 11897    | OUNET A             | 1832         | 30          |
|    |              |                 |            |          | OUNETB              | 2317         | 37          |
|    |              |                 |            |          | SENNOU PEULH        | 2934         | 48          |
|    |              | SORI            | 14         | 21735    | GAMAGOU             | 1761         | 21          |
|    |              |                 |            |          | OUESSENE PEULH      | 1229         | 16          |
|    |              |                 |            |          | PIGOUROU            | 2402         | 30          |

| N° | DEPARTEMENTS | ARRONDISSEMENTS | GRAPPES | POP. ARR | QUARTIERS/ VILLAGES | POP. VILLAGE | NOMBRE PERS |
|----|--------------|-----------------|---------|----------|---------------------|--------------|-------------|
|    |              |                 |         |          | SORI PEULH          | 3969         | 49          |
|    |              | KANDI 1         | 15      | 8172     | DAMADI              | 1401         | 39          |
|    |              |                 |         |          | GANDO KOSSIKANA     | 1283         | 35          |
|    |              |                 |         |          | GANSOSSO            | 1497         | 41          |
|    |              | MADECALI        | 16      | 14105    | KASSA               | 3507         | 42          |
|    |              |                 |         |          | MADECALI            | 6202         | 74          |
| 4  | ZOU          | AGBOKPA         | 17      | 5042     | DOKON               | 1457         | 45          |
|    |              |                 |         |          | GNANSATA            | 1147         | 36          |
|    |              |                 |         |          | SONOUAKOUTA         | 1091         | 34          |
|    |              | TANVE           | 18      | 8034     | DEKANME             | 1324         | 28          |
|    |              |                 |         |          | HOUALA              | 1229         | 27          |
|    |              |                 |         |          | KPODJI-AGA          | 1161         | 25          |
|    |              |                 |         |          | TANVE               | 1684         | 36          |
|    |              | BOHICON 2       | 19      | 37546    | AGONVEZOUN          | 3733         | 25          |
|    |              |                 |         |          | GANKONPONSA         | 3018         | 20          |
|    |              |                 |         |          | GBANHICON           | 4683         | 31          |
|    |              |                 |         |          | KPOKON              | 5507         | 38          |
|    |              | DJIDJA          | 20      | 15549    | AGONHOHOUN          | 692          | 13          |
|    |              |                 |         |          | DONA                | 803          | 15          |
|    |              |                 |         |          | KOME                | 960          | 18          |
|    |              |                 |         |          | SOVLENI             | 1510         | 29          |
|    |              |                 |         |          | WOGBAYE             | 869          | 16          |
|    |              |                 |         |          | ZINKANME            | 1229         | 23          |
|    |              | KPAKPAME        | 21      | 10254    | AFFOSSOWOGBA        | 907          | 19          |
|    |              |                 |         |          | DRAME               | 1985         | 42          |
|    |              |                 |         |          | GUINGNIN-MLINKPIN   | 730          | 16          |
|    |              |                 |         |          | SOME                | 1805         | 38          |
|    |              | ZOUKOU          | 22      | 6108     | AGRIMEY             | 842          | 36          |

| N° | DEPARTEMENTS | ARRONDISSEMENTS                     | GRAPPES | POP. ARR | QUARTIERS/ VILLAGES | POP. VILLAGE | NOMBRE PERS |
|----|--------------|-------------------------------------|---------|----------|---------------------|--------------|-------------|
|    |              |                                     |         |          | BOGNONGON           | 969          | 40          |
|    |              |                                     |         |          | KOTOAYIVEDJI        | 915          | 38          |
| 5  | LITTORAL     | 3 <sup>ème</sup><br>ARRONDISSEMENT  | 23      | 59830    | ADOLETA             | 5500         | 19          |
|    |              |                                     |         |          | GBENONKPO           | 3171         | 10          |
|    |              |                                     |         |          | KPANKPAN            | 5637         | 20          |
|    |              |                                     |         |          | SEGBEYA SUD         | 2133         | 7           |
|    |              |                                     |         |          | AGBATO              | 6143         | 21          |
|    |              |                                     |         |          | AGBODJEDO           | 4930         | 16          |
|    |              |                                     |         |          | AYELAWADJE I        | 7181         | 24          |
|    |              | 5 <sup>ème</sup><br>ARRONDISSEMENT  | 24      | 32864    | TOKPA HOHO          | 1899         | 14          |
|    |              |                                     |         |          | GBETO               | 914          | 7           |
|    |              |                                     |         |          | MIFONGOU            | 2001         | 15          |
|    |              |                                     |         |          | JONQUET             | 2167         | 16          |
|    |              |                                     |         |          | BOCOSSI TOKPA       | 1799         | 13          |
|    |              |                                     |         |          | GBEDOKPO            | 2606         | 19          |
|    |              |                                     |         |          | MISSEBO             | 1539         | 11          |
|    |              |                                     |         |          | MISSITE             | 2483         | 19          |
|    |              | 8 <sup>ème</sup><br>ARRONDISSEMENT  | 25      | 37631    | AGONTIKON           | 4558         | 25          |
|    |              |                                     |         |          | HOUEHOUN            | 5017         | 27          |
|    |              |                                     |         |          | HOUENOUSSOU         | 6095         | 34          |
|    |              |                                     |         |          | MINONKPO            | 5160         | 29          |
|    |              | 10 <sup>ème</sup><br>ARRONDISSEMENT | 26      | 41806    | KOUHOUNOU           | 11670        | 48          |
|    |              |                                     |         |          | MISSEPLE            | 4336         | 18          |
|    |              |                                     |         |          | MISSOGBE            | 3129         | 13          |
|    |              |                                     |         |          | YENAWA              | 8911         | 37          |
|    |              | 13 <sup>ème</sup><br>ARRONDISSEMENT | 27      | 63572    | AGLA                | 37880        | 86          |
|    |              |                                     |         |          | AIBATIN II          | 10128        | 23          |
|    |              |                                     |         |          | HOUENOUSSOU         | 3209         | 7           |
| 6  | MONO         | LOBOGO                              | 28      | 17622    | ADJAME              | 415          | 6           |



| N° | DEPARTEMENTS | ARRONDISSEMENTS                                 | GRAPPES | POP. ARR | QUARTIERS/ VILLAGES       | POP. VILLAGE | NOMBRE PERS |
|----|--------------|-------------------------------------------------|---------|----------|---------------------------|--------------|-------------|
|    |              |                                                 |         |          | DJOFOUN                   | 898          | 14          |
|    |              |                                                 |         |          | LABOGO GBETOCOME          | 4059         | 60          |
|    |              |                                                 |         |          | HANGNANME                 | 924          | 14          |
|    |              |                                                 |         |          | ATOHOUE                   | 444          | 7           |
|    |              |                                                 |         |          | YONOUHOUE                 | 914          | 14          |
|    |              | AVLOH                                           | 29      | 3416     | AVLOH PLAGES              | 590          | 27          |
|    |              |                                                 |         |          | HOOHOUE                   | 1129         | 50          |
|    |              |                                                 |         |          | KOENTA                    | 861          | 38          |
|    |              | KOUDO                                           | 30      | 12427    | KOUDO                     | 2761         | 42          |
|    |              |                                                 |         |          | TINOUE                    | 1425         | 22          |
|    |              |                                                 |         |          | TOZOUME                   | 3385         | 51          |
| 7  | OUEME        | AKPADANOU                                       | 31      | 6158     | ALLANDOHOU I              | 395          | 16          |
|    |              |                                                 |         |          | ALLANDOHOU II             | 630          | 27          |
|    |              |                                                 |         |          | HOUEDO-AGUE               | 332          | 14          |
|    |              |                                                 |         |          | KPATINSA                  | 694          | 29          |
|    |              |                                                 |         |          | SOKPETINKON               | 677          | 29          |
|    |              | VAKON                                           | 32      | 20541    | GOUAKO, KOTOCLOME         | 2290         | 23          |
|    |              |                                                 |         |          | VAAKON, AZOHOUE           | 4719         | 48          |
|    |              |                                                 |         |          | VAKON, GBO                | 4299         | 44          |
|    |              | AVRANKOU                                        | 33      | 13734    | AVALIGBO                  | 950          | 16          |
|    |              |                                                 |         |          | DANGBODJI                 | 939          | 16          |
|    |              |                                                 |         |          | HOUZE                     | 2314         | 40          |
|    |              |                                                 |         |          | KOGBOME                   | 802          | 14          |
|    |              |                                                 |         |          | LATCHE OUEZOUNME          | 1659         | 29          |
|    |              | 1 <sup>er</sup><br>ARRONDISSEMENT<br>PORTO-NOVO | 34      | 33830    | ACCRON GOGANKOME          | 3855         | 18          |
|    |              |                                                 |         |          | ADJEGOUNLE                | 2205         | 10          |
|    |              |                                                 |         |          | AHOUEANTINKOMEY           | 2381         | 11          |
|    |              |                                                 |         |          | AVASSA BAGORO<br>AGBOKOME | 1239         | 5           |

| N°        | DEPARTEMENTS | ARRONDISSEMENTS                                  | GRAPPES | POP. ARR | QUARTIERS/ VILLAGES | POP. VILLAGE | NOMBRE PERS |
|-----------|--------------|--------------------------------------------------|---------|----------|---------------------|--------------|-------------|
|           |              |                                                  |         |          | FLEKOMEY-ILEFIE     | 946          | 4           |
|           |              |                                                  |         |          | GBEKON              | 3170         | 15          |
|           |              |                                                  |         |          | HONDJI HONNOU FILLA | 1002         | 4           |
|           |              |                                                  |         |          | HOUEGBO HLINKOMEY   | 1400         | 7           |
|           |              |                                                  |         |          | HOUEYOGBE GBEDJI    | 1183         | 5           |
|           |              |                                                  |         |          | KPOTA SANDODO       | 951          | 4           |
|           |              |                                                  |         |          | OGANLA GARE EST     | 3643         | 17          |
|           |              |                                                  |         |          | SADOGNON ADJEGOUNLE | 1362         | 7           |
|           |              |                                                  |         |          | SADOGNON WOUSSA     | 1363         | 7           |
|           |              | 4 <sup>ème</sup><br>ARRONDISSEMENT<br>PORTO-NOVO | 35      | 57311    | ANAVIE              | 6449         | 21          |
|           |              | DJEGAN KPEVI                                     | 5234    | 18       |                     |              |             |
|           |              | DODJI                                            | 5097    | 17       |                     |              |             |
|           |              | GBEDJROMEDE                                      | 6612    | 21       |                     |              |             |
|           |              | GUEVIE                                           | 3653    | 12       |                     |              |             |
|           |              | HLOMGOU                                          | 3108    | 10       |                     |              |             |
|           |              | KANDEVIE-MISSOGBE                                | 4759    | 16       |                     |              |             |
|           |              | AGBLANGANDAN                                     | 36      | 30716    | AGBALILAME          | 5242         | 32          |
|           |              | AGLANGANDAN                                      | 6164    | 37       |                     |              |             |
|           |              | DAVATIN                                          | 613     | 3        |                     |              |             |
|           |              | LOKOKOUCOUME                                     | 5921    | 36       |                     |              |             |
| MOUDOKOME | 1055         | 7                                                |         |          |                     |              |             |
| 8         | COUFFO       | AZOVE                                            | 37      | 22853    | AVEGODOUI           | 3084         | 22          |
|           |              |                                                  |         |          | AZOVE               | 5031         | 35          |
|           |              |                                                  |         |          | DJIMADOHOUE         | 2094         | 15          |
|           |              |                                                  |         |          | EKINHOUE            | 3173         | 23          |
|           |              |                                                  |         |          | YEHOUEMEY           | 2693         | 20          |
|           |              | ADJINTINMEY                                      | 38      | 10691    | AGOHOUE-BALLIMEY    | 2140         | 44          |
|           |              |                                                  |         |          | GBOTOHOUE           | 1331         | 26          |
|           |              |                                                  |         |          | HEKPE               | 2349         | 44          |

| N°  | DEPARTEMENTS | ARRONDISSEMENTS | GRAPPES  | POP. ARR | QUARTIERS/ VILLAGES | POP. VILLAGE | NOMBRE PERS |
|-----|--------------|-----------------|----------|----------|---------------------|--------------|-------------|
|     |              | HONTON          | 39       | 5814     | ATCHANHOUE          | 1262         | 47          |
|     |              |                 |          |          | KOETIME             | 871          | 32          |
|     |              |                 |          |          | KPOHA               | 979          | 36          |
|     |              | HONDJI          | 40       | 6873     | HONDJIN<br>AKPAHOUE | 2342         | 63          |
|     |              |                 |          |          | KOGBETOHOUE         | 1324         | 35          |
|     |              |                 |          |          | KOME                | 597          | 16          |
|     |              | LALO            | 41       | 10038    | LALO CENTRE         | 4286         | 66          |
|     |              |                 |          |          | GOULOKO             | 1442         | 22          |
|     |              |                 |          |          | ZONMONDJI           | 1768         | 27          |
| 9   | COLLINES     | GOUKA           | 42       | 13765    | GALATA              | 2083         | 26          |
|     |              |                 |          |          | GOUKA               | 3448         | 44          |
|     |              |                 |          |          | MAMATCHOKPE         | 1179         | 15          |
|     |              | DASSA1          | 43       |          | MAYAMON             | 2420         | 30          |
|     |              |                 |          |          | ESSEBRE             | 928          | 23          |
|     |              |                 |          |          | ESSEKPA             | 1784         | 43          |
|     |              |                 |          |          | LATIN               | 1973         | 48          |
|     |              | GLAZOUE         | 44       | 12822    | AFFECIA             | 3550         | 47          |
|     |              |                 |          |          | OROKOTO             | 1140         | 14          |
|     |              |                 |          |          | ZONGO               | 4119         | 54          |
|     |              | DOUME           | 45       | 13592    | ABALA               | 1258         | 18          |
|     |              |                 |          |          | AFE-ZOUNGO          | 2596         | 37          |
|     |              |                 |          |          | DOUME-LAKOUN        | 1882         | 26          |
|     |              |                 |          |          | KANAOUN             | 1565         | 22          |
|     |              |                 |          |          | KOFFE AGBALA        | 858          | 12          |
| OFE | 46           | 9926            | AYEDJOKO | 2153     | 34                  |              |             |
|     |              |                 | DANI     | 2689     | 42                  |              |             |
|     |              |                 | GOBE     | 2420     | 38                  |              |             |
| 10  | BORGOU       | INA             | 47       | 16558    | GUESSOU-SUD         | 4613         | 45          |

| N° | DEPARTEMENTS | ARRONDISSEMENTS                               | GRAPPES | POP. ARR | QUARTIERS/ VILLAGES    | POP. VILLAGE | NOMBRE PERS |
|----|--------------|-----------------------------------------------|---------|----------|------------------------|--------------|-------------|
|    |              |                                               |         |          | INA I                  | 3188         | 31          |
|    |              |                                               |         |          | INA II                 | 1973         | 20          |
|    |              |                                               |         |          | INA PEULH              | 1231         | 13          |
|    |              |                                               |         |          | KONOU                  | 618          | 6           |
|    |              | N'DALI                                        | 48      | 15314    | SAKAROU                | 928          | 8           |
|    |              |                                               |         |          | SUANIN                 | 4943         | 42          |
|    |              |                                               |         |          | WOBK KAROU             | 7767         | 65          |
|    |              | GNONKOURAKALI                                 | 49      | 9130     | GBARI                  | 2054         | 34          |
|    |              |                                               |         |          | GNONKOURAKALI          | 2304         | 38          |
|    |              |                                               |         |          | GUINROU PEULH          | 1082         | 18          |
|    |              |                                               |         |          | SOUBO                  | 1530         | 25          |
|    |              | 1 <sup>er</sup><br>ARRONDISSEMENT<br>PARAKOU  | 50      | 66994    | ALAGA                  | 5042         | 12          |
|    |              |                                               |         |          | ALBARIKA               | 6817         | 16          |
|    |              |                                               |         |          | TOUROU I               | 2081         | 5           |
|    |              |                                               |         |          | TOUROU IV              | 4076         | 10          |
|    |              |                                               |         |          | TOUROU V               | 2668         | 7           |
|    |              |                                               |         |          | BAPEROU                | 2441         | 6           |
|    |              |                                               |         |          | KADERA                 | 1010         | 3           |
|    |              |                                               |         |          | MADINA                 | 3612         | 9           |
|    |              |                                               |         |          | SAWARAROU              | 189          | 0           |
|    |              |                                               |         |          | SINAGOUROU             | 5290         | 13          |
|    |              |                                               |         |          | TITIROU                | 9066         | 23          |
|    |              |                                               |         |          | ZAZIRA                 | 3437         | 9           |
|    |              | 3 <sup>eme</sup><br>ARRONDISSEMENT<br>PARAKOU | 51      | 37060    | AMAOUIGNON<br>DEKPAROU | 3589         | 28          |
|    |              |                                               |         |          | GAH CENTRE             | 3878         | 31          |
|    |              |                                               |         |          | TRANZA                 | 3861         | 31          |
|    |              |                                               |         |          | SWINROU                | 3076         | 25          |
|    |              | SINENDE                                       | 52      | 25984    | DIADIA                 | 2147         | 15          |

| N° | DEPARTEMENTS | ARRONDISSEMENTS | GRAPPES | POP. ARR | QUARTIERS/ VILLAGES | POP. VILLAGE | NOMBRE PERS |
|----|--------------|-----------------|---------|----------|---------------------|--------------|-------------|
|    |              |                 |         |          | GNANRO-BARIBA       | 4331         | 28          |
|    |              |                 |         |          | GOUROU              | 3717         | 24          |
|    |              |                 |         |          | GUESSOU BANI        | 3939         | 25          |
|    |              |                 |         |          | LEMANOU             | 3381         | 22          |
| 11 | ATACORA      | MANTA           | 53      | 10683    | DIKON HEIN          | 1385         | 23          |
|    |              |                 |         |          | DIPOKOR I           | 1223         | 20          |
|    |              |                 |         |          | KOUHINGOU           | 592          | 9           |
|    |              |                 |         |          | KOUKOUANGOU         | 1580         | 26          |
|    |              |                 |         |          | KOUTANGOU           | 1161         | 18          |
|    |              |                 |         |          | TATCHADIETA         | 1083         | 18          |
|    |              | COBLY           | 54      | 17809    | COBLY               | 4646         | 43          |
|    |              |                 |         |          | KOUKONTOUGA         | 946          | 9           |
|    |              |                 |         |          | NANAGADE            | 4036         | 37          |
|    |              |                 |         |          | OUOROU              | 1642         | 16          |
|    |              |                 |         |          | TOUGA               | 1220         | 11          |
|    |              | OROUKAYO        | 55      | 15832    | BOROUKOU-PEULH      | 237          | 4           |
|    |              |                 |         |          | DEKEROU             | 1427         | 20          |
|    |              |                 |         |          | GANIKPEROU          | 1800         | 26          |
|    |              |                 |         |          | NIARO-GNINON        | 1302         | 19          |
|    |              |                 |         |          | NIEKENE BANSOU      | 3171         | 46          |
|    |              | MATERI          | 56      | 17887    | KANKINI-SER         | 1898         | 19          |
|    |              |                 |         |          | MATERI              | 4255         | 44          |
|    |              |                 |         |          | NAGASSEGA-KANI      | 1523         | 16          |
|    |              |                 |         |          | SOMOU               | 1840         | 19          |
|    |              |                 |         |          | YONDISSERI          | 1570         | 16          |
|    |              | PEHUNCO         | 57      | 27101    | PEHUNCO I           | 4045         | 30          |
|    |              |                 |         |          | PEHUNCO II          | 3194         | 24          |
|    |              |                 |         |          | SINAOURAROU         | 3462         | 26          |
|    |              |                 |         |          | SOAODOU             | 2790         | 21          |

| N°        | DEPARTEMENTS | ARRONDISSEMENTS | GRAPPES | POP. ARR   | QUARTIERS/ VILLAGES | POP. VILLAGE | NOMBRE PERS |
|-----------|--------------|-----------------|---------|------------|---------------------|--------------|-------------|
|           |              |                 |         |            | SOASSARAROU         | 956          | 7           |
|           |              |                 |         |            | SOMPAREROU-GAH      | 964          | 7           |
|           |              |                 |         |            |                     |              |             |
| 12        | DONGA        | ALEDJO          | 58      | 11988      | ALEDJO              | 4499         | 58          |
| BOUTOU    |              |                 |         |            | 971                 | 12           |             |
| PARTAGO   |              |                 |         |            | 2763                | 37           |             |
| TCHIMBERI |              |                 |         |            | 583                 | 8            |             |
| COPARGO   |              | 59              | 19020   | GALORA     | 3537                | 38           |             |
|           |              |                 |         | PASSABIA   | 3246                | 35           |             |
|           |              |                 |         | SATIEKA    | 3901                | 42           |             |
| SEROU     |              | 60              | 10382   | ALFA-KPARA | 2866                | 49           |             |
|           |              |                 |         | BOUNVARI   | 1854                | 32           |             |
|           |              |                 |         | SEROU      | 2026                | 34           |             |
