# Supplementary material for: Magnitude of Cardiovascular Risk Factors in Rural and Urban Areas in Benin: Findings from a Nationwide Steps Survey
Source: PLoS One. 2015 May 6;10(5):e0126441. doi: 10.1371/journal.pone.0126441 (PMC4422555; doi:10.1371/journal.pone.0126441)
Supplement: S1 Text — (PDF) [file pone.0126441.s001.pdf]

Organisation Mondiale de la Santé

L'approche STEPwise sur les facteurs de risque des MNT  
Instrument de saisie des données STEPS v2.0, STEPS BENIN 2008

ID : Numéro d'Identification du répondant #####

-----  
Section I: Information sur le lieu et la date  
-----

I1 Code du district ###  
I2 Nom du centre/village \_\_\_\_\_  
I3 Code du centre/village (1. urbain/2. rural) #  
Depart : département

-----  
STEP 1: QUESTIONNAIRE  
-----

INFORMATION DEMOGRAPHIQUE

C1 Sexe (1. Masculin, 2. Féminin) #  
C2 Quelle est votre date de naissance ?  
<dd/mm/yyyy>  
C3 Quel âge avez-vous ? ##  
C4 En tout, combien d'années passé à l'école ou à suivre formation ? ##  
C6 Quel est le plus haut niveau d'instruction que vous ayez atteint ? ##  
1 "Aucune instruction officielle"  
2 "Moins que l'école primaire"  
3 "Fin de l'école primaire"  
4 "Fin de l'école secondaire"  
5 "Fin du lycée ou équivalent"  
6 "École supérieure, Université"  
7 "Diplôme post-universitaire obten"  
77 "ne sait pas"  
88 refuse  
99 "réponse manquante"  
  
C7 Laquelle des catégories suivantes décrit le mieux votre activité prof. ? ##  
1 "Employé(e) de l'État"  
2 "Employé(e) dans le privé"  
3 Indépendant(e)  
4 Bénévole  
5 Étudiant(e)  
6 "Maître(sse de maison"  
7 Retraité(e)  
8 Chômeur(se)  
9 Invalide  
10 Autres  
77 "ne sait pas"  
88 refuse  
99 "réponse manquante"  
  
C9(a-d) En prenant comme référence l'année passée, pouvez dire revenus moyens ?  
C9a Par semaine #####  
C9b ou par mois #####  
C9c ou par an #####  
C9d Refuse ##  
  
C10 Si vous ne connaissez pas le montant, pouvez donner estimation revenu ##  
1 "<= 66.000"  
2 [67.000-132.000]  
3 [133.000-198.000]  
4 [199.000-264.000]  
5 "> 264.000"  
77 "ne sait pas"  
88 refuse  
99 "réponse manquante"

-----  
 CONSOMMATION DE TABAC

T1 Fumez-vous actuellement des produits à base du tabac? ##  
 T2 Si oui, fumez-vous quotidiennement ? ##  
 T3 A quel âge avez-vous commencé à fumer quotidiennement ? ##  
 Si vous ne vous rappelez pas à quel âge, souvenez-vous depuis quand vous  
 avez commencé à fumer quotidiennement ?  
 T4a En années ##  
 T4b En mois ##  
 T4c En semaines ##  
 Quelle quantité des produits suivants fumez-vous en moyenne chaque jour ?  
 T5a Cigarettes industrielles ##  
 T5b Cigarettes roulées ##  
 T5c Pipes ##  
 T5d Cigares/cheroots ##  
 T5e Autre ##  
 T5other \_\_\_\_\_  
 T6 Dans le passé, avez-vous déjà fumé quotidiennement ? ##  
 T7 Quel âge aviez-vous quand vous avez arrêté de fumer quotidiennement ? ##  
 Si vous ne vous rappelez pas de l'âge, souvenez-vous depuis quand vous  
 avez arrêté de fumer quotidiennement ?  
 T8a En années ##  
 T8b En mois ##  
 T8c En semaines ##  
 T9 Consommez-vous actuellement du tabac non fumé ? ##  
 T10 Si Oui: En consommez-vous quotidiennement ? ##  
 En moyenne, combien de fois par jour prenez-vous les produits indiqués:  
 T11a Tabac à priser (voie orale) ##  
 T11b Tabac à priser (voie nasale) ##  
 T11c Tabac à mâcher ##  
 T11d Feuilles de bétel ##  
 T11e Autre ##  
 T11other \_\_\_\_\_  
 T12 Dans le passé, avez-vous déjà pris quotidiennement du tabac non fumé ? ##

-----  
 CONSOMMATION D'ALCOOL

A1 Avez-vous consommé une boisson alcoolisée dans les 12 derniers mois ? ##  
 A2 Durant les douze derniers mois, à quelle fréquence boisson alcoolisée ? ##  
 1 Quotidiennement  
 2 "5-6 jours par semaine"  
 3 "1-4 jours par semaine"  
 4 "1-3 jours par mois"  
 5 "Moins d'1 fois par mois"  
 7 "ne sait pas"  
 8 refuse  
 9 "réponse manquante"  
 A3 Quand vous buvez de l'alcool, combien de verres en moyenne par jour ? ##  
 A4 Avez-vous consommé une boisson alcoolisée ces trente derniers jours ? ##  
 A5(a-g) Au cours des 7 derniers jours, combien de verres standard d'alcool?  
 A5a Lundi ##  
 A5b Mardi ##  
 A5c Mercredi ##  
 A5d Jeudi ##  
 A5e Vendredi ##  
 A5f Samedi ##  
 A5g Dimanche ##  
 A6 Dans les 12 derniers mois, le plus grand nombre de verres ? ##  
 A7 Homme: Combien de jours avez-vous consommé 5 verres ou + ? ###  
 A8 Femme: Combien de jours avez vous consommé 4 verres ou + ? ###

-----  
HYGIENE ALIMENTAIRE

D1 Habituellement, au cours d'une semaine, combien de jours consommer fruits ? ##  
D2 Combien de portions de fruits mangez-vous lors d'une de ces journées ? ##  
D3 Habituellement, au cours d'une semaine, combien de jours consommer légumes ? ##  
D4 Combien de portions de légumes mangez-vous lors d'une de ces journées ? ##  
-----

SEDENTARITE

Combien de temps passez-vous en position assise lors d'une journée habituelle ?

P16a heures ##

P16b minutes ##  
-----

ANTECEDENTS DE LA TENSION ARTERIELLE (TA)

H2 Est-ce qu'un professionnel vous a dit que vous aviez TA élevée ? ##

H3(a-e) Suivez-vous actuellement les traitements suivants ?

H3a Médicaments ##

H3b Régime spécial prescrit ##

H3c Conseil pour perdre du poids ##

H3d Conseil pour arrêter de fumer ##

H3e Conseil pour activité physique ##  
-----

ANTECEDENTS DE DIABETE

H6 A-t-on mesuré votre glycémie ces 12 derniers mois ? ##

H7 Est-ce qu'un professionnel vous a déjà dit que avez du diabète ? ##

H8(a-f) Suivez-vous actuellement les traitements suivants ?

H8a Insuline ##

H8b Traitement oral ##

H8c Régime spécial prescrit ##

H8d Conseil pour perdre du poids ##

H8e Conseil pour arrêter de fumer ##

H8f Conseil pour activité physique ##  
-----

STEP 2: MESURES PHYSIQUES

POIDS ET TAILLE

M3 Taille ###.#

M4 Poids ###.#

TOUR DE TAILLE

M7 Tour de taille ###.#

PRESSION ARTERIELLE

M11a Mesure systolique 1 ###

M11b Mesure diastolique 1 ###

M12a Mesure systolique 2 ###

M12b Mesure diastolique 2 ###

M13a Mesure systolique 3 ###

M13b Mesure diastolique 3 ###

M14 Suivi d'un traitement? ##  
-----

TOUR DE HANCHE

M15 Tour de hanche ###.#

RYTHME CARDIAQUE

M16a Mesure 1 ###

M16b Mesure 2 ###

M16c Mesure 3 ###  
-----

STEP 3: MESURES BIOCHIMIQUES

B5 Glycémie à jeun ##.##

B7 Cholesterol Total ##.##
